# Supplementary material for: Congenital anomalies and associated risk factors in a Saudi population: a cohort study from pregnancy to age 2 years
Source: PubMed Central journal article supplement — BMJ Open. 2019 Sep 5;9(9):e026351. doi: 10.1136/bmjopen-2018-026351 (PMC6731804; doi:10.1136/bmjopen-2018-026351), 2019-09-05
Supplement: bmjopen-2018-026351.draft_revisions.pdf [file bmjopen-2018-026351.draft_revisions.pdf]

# BMJ Open

BMJ Open is committed to open peer review. As part of this commitment we make the peer review history of every article we publish publicly available.

When an article is published we post the peer reviewers' comments and the authors' responses online. We also post the versions of the paper that were used during peer review. These are the versions that the peer review comments apply to.

The versions of the paper that follow are the versions that were submitted during the peer review process. They are not the versions of record or the final published versions. They should not be cited or distributed as the published version of this manuscript.

BMJ Open is an open access journal and the full, final, typeset and author-corrected version of record of the manuscript is available on our site with no access controls, subscription charges or pay-per-view fees (<http://bmjopen.bmj.com>).

If you have any questions on BMJ Open's open peer review process please email [editorial.bmjopen@bmj.com](mailto:editorial.bmjopen@bmj.com)

# BMJ Open

## Birth defects and associated risk factors in a Saudi population: a cohort study from pregnancy to age 2 years

|                               |                                                                                                                                                                                                                                                                                                                                                                                                                                  |
|-------------------------------|----------------------------------------------------------------------------------------------------------------------------------------------------------------------------------------------------------------------------------------------------------------------------------------------------------------------------------------------------------------------------------------------------------------------------------|
| Journal:                      | <i>BMJ Open</i>                                                                                                                                                                                                                                                                                                                                                                                                                  |
| Manuscript ID                 | bmjopen-2018-026351                                                                                                                                                                                                                                                                                                                                                                                                              |
| Article Type:                 | Research                                                                                                                                                                                                                                                                                                                                                                                                                         |
| Date Submitted by the Author: | 28-Aug-2018                                                                                                                                                                                                                                                                                                                                                                                                                      |
| Complete List of Authors:     | Kurdi, Ahmed; Prince Sultan Military Medical City, Majeed-Saidan, Muhammad Ali; Prince Sultan Military Medical City, Paediatrics<br>Al Rakaf, Maha; Prince Sultan Military Medical City, Obstetrics & Gynecology<br>AlHashem, Amal; Prince Sultan Military Medical City<br>Botto, Lorenzo; University of Utah, Pediatrics<br>Baageel, Hassan; King Saud bin Abdulaziz University for Health Sciences<br>Ammari, Amer; Pediatrics |
| Keywords:                     | Birth defects, Prevalence, Risk factors, Prevention, Outcome                                                                                                                                                                                                                                                                                                                                                                     |
|                               |                                                                                                                                                                                                                                                                                                                                                                                                                                  |

SCHOLARONE™  
Manuscripts

1  
2  
3  
4 **Birth defects and associated risk factors in a Saudi population: a**  
5 **cohort study from pregnancy to age 2 years**  
6  
7  
8  
9

10 Ahmed M Kurdi<sup>1</sup>, Muhammad A Majeed-Saidan<sup>2</sup>, Maha S Al Rakaf<sup>1</sup>,  
11 Amal M AlHashem<sup>2</sup>, Lorenzo D Botto<sup>3</sup>, Hassan S Baaqeel<sup>4</sup>, Amer N  
12 Ammari<sup>2</sup>.  
13  
14  
15

16  
17  
18  
19 <sup>1</sup> Division of Maternal and Fetal Medicine, Department of Obstetrics  
20 and Gynaecology, Prince Sultan Military Medical City (PSMMC), P.O.  
21 Box 7897, Riyadh, 11159, Saudi Arabia.  
22  
23  
24

25  
26  
27 <sup>2</sup> Department of Paediatric, Division of neonatal medicine, PSMMC.  
28  
29

30  
31 <sup>2</sup> Department of Paediatric, Division of medical genetics, PSMMC  
32  
33  
34

35  
36 <sup>3</sup> Department of Paediatric, Division of medical Genetics, 295 Chipeta  
37 way, Suite 25010, University of Utah school of medicine, Salt Lake  
38 City, UT, USA,  
39  
40  
41  
42  
43

44  
45 <sup>4</sup> Department of Obstetrics and Gynaecology, King Saud Bin  
46 AbdulAziz University for Health Sciences, Jeddah, Saudi Arabia,  
47  
48  
49

50  
51 **Running title:** Birth Defects and Risk Factors in a Saudi population  
52  
53

54 **Corresponding author:**  
55  
56  
57  
58  
59  
60

1  
2  
3 **Dr. Ahmed M. Kurdi, MD, German Board, DFM**

4  
5 Consultant Maternal and Fetal Medicine

6  
7 Avenue Medical Center

8  
9 Kingdom of Saudi Arabia

10  
11 Telephone: work +966-112000099 Ext. 158

12  
13 Mobile: +966505451701

14  
15 Fax: 0096611-4500185

16  
17 Email: [ahmedkurdi1950@gmail.com](mailto:ahmedkurdi1950@gmail.com)

18  
19  
20  
21  
22  
23  
24  
25  
26  
27  
28  
29 **Abstract**

30  
31  
32  
33  
34 **Background:** Birth defects (BD) are a recognized global health priority  
35 because of their increasing impact on childhood survival and health  
36 worldwide. However, information on the three key areas of risk factor  
37 prevalence, BD occurrence, and BD-related outcomes are limited in  
38 low and middle-income countries, where most BD occurs.

39  
40  
41  
42  
43 **Objective:** To assess the three key issues for birth defect prevention  
44 and care, namely risk factor prevalence, birth defects occurrence, and  
45 survival, in a well-defined longitudinal cohort in Riyadh, Saudi Arabia.

46  
47  
48  
49  
50 **Design:** Longitudinal, prospective cohort study with a nested case-  
51 control study.

52  
53  
54 **Setting:** Prince Sultan Military Medical City, Riyadh Saudi Arabia.

1  
2  
3  
4 **Participants:** Pregnant Saudi women enrolled over three years, and  
5  
6 their 28646 eligible births. The nested case-control study evaluated  
7  
8 the underlying cohort's birth defects risk factor profile. All cases (1  
9  
10 179) and the unaffected controls (1 262) were followed through age 2  
11  
12 years.

13  
14 **Main outcome measures:** Frequency of birth defects related risk  
15  
16 factor, the prevalence and pattern of major birth defects, and survival  
17  
18 through age 2 years.

19  
20  
21 **Results:** In this cohort of women, the burden of potentially modifiable  
22  
23 risk factors included high rates of diabetes (7.3%), maternal age >40  
24  
25 years (7.0%), consanguinity (54.5%), and lack of periconceptional folic  
26  
27 acid use (90.8%). The birth prevalence of birth defects was 41.2/1,000  
28  
29 births, driven mainly by congenital heart disease (14.8 per 1000), renal  
30  
31 malformations (11.3), neural tube defects (1.9), and chromosomal  
32  
33 anomalies (2.7). Mortality for live births with BD at 2 years of age was  
34  
35 15.8%.

36  
37  
38 **Conclusions:** This study documented specific opportunities for  
39  
40 primary prevention and for better care. Folic acid fortification (the rate  
41  
42 of neural tube defect was more than 3 times higher than what might  
43  
44 be achieved with full fortification), preconception diabetes screening  
45  
46 and consanguinity-related counseling could have significant health  
47  
48 benefits, in this cohort and arguably in the larger Saudi population.  
49  
50  
51  
52  
53  
54

55 **Article summary:**  
56  
57  
58  
59  
60

### Strengths and limitations of this study

- Babies with birth defects are diagnosed prospectively; prenatally, postnatally, and followed up to 2 years of age.
- Involvement of multidisciplinary teams in establishing the final diagnosis.
- Inclusion of elective termination of pregnancies with lethal birth defects and stillbirth.
- Single center study. The pregnancy cohort was mainly from families of Saudi army personnel dependents. could present a limiting factor.

**The original protocol of the study:** See supplementary file.

**Funding statement:** This project was supported by a generous grant from King Abdul-Aziz City for Science and Technology (KACST) through the National Science, Technology and Innovation Plan (NSTIP). Project No: 09-MED748-21.

**Disclaimer:** The funding institution has no role in the study design, data collections, analysis, interpretation of data and the writing of the various reports or the decision for submission for publications. All authors have full independence from the funder and have full access to the data in the study and take full responsibility for the integrity of the data and the accuracy of the analysis.

**Competing interests statement:**

All authors have completed the ICMJE uniform disclosure form at [www.icmje.org-coi\\_disclosure.pdf](http://www.icmje.org-coi_disclosure.pdf) and declare: no support from any organization for the submitted research article; no financial relationship with any organization that might have an interest in the submitted work in the previous three years; no other relationships or activities that could appear to have influenced the submitted work.

**Key Words:** Birth defects, Prevalence, Risk factors, Prevention, and outcome

**Birth defects and associated risk factors in a Saudi population:  
a cohort study from pregnancy to age 2 years****Introduction**

Birth defects (BD) are increasingly recognized as a global health priority because of their lifelong impact on health and survival<sup>1,2</sup>. As causes of early mortality such as infections are being brought under control, BD are becoming increasingly important drivers of child survival and health also in low- and middle-income countries<sup>1,3</sup>. BD affect approximately an estimated 1 in 33 newborns, contribute each year to 300,000 deaths in the first month of life, and are associated with 3.2 million birth-related disabilities<sup>3</sup>. Accordingly, the World

1  
2  
3 Health Assembly has emphasized the urgent need for action to help  
4 prevent, diagnose, and provide timely intervention <sup>1</sup>.  
5  
6  
7  
8  
9

10 However, local action, whether focused on primary prevention or on  
11 improving care, is most effective when based on by reliable  
12 information on key indicators on causes and outcomes of BD in the  
13 underlying population. These data are typically scarce outside a few  
14 high-resource countries. In this study, we implemented an integrated  
15 approach to generate these data in well-defined cohort of women,  
16 tracked from mid-gestation through the second year of life of their  
17 children, to assess concurrently the burden of potentially modifiable  
18 risk factors, the occurrence of BD, and survival of affected children, as  
19 a basis for better prevention and care <sup>4</sup>.  
20  
21  
22  
23  
24  
25  
26  
27  
28  
29  
30  
31  
32  
33

## 34 **Methods**

35  
36  
37  
38 **Setting.** The Prince Sultan Military Medical City (PSMMC) is a tertiary  
39 teaching institution with 1250 beds and approximately 10,000 annual  
40 deliveries. PSMMC primarily serves Saudi army personnel and their  
41 families and is a referral center for the other 16 military hospitals in  
42 the Kingdom of Saudi Arabia. The fetal medicine unit includes  
43 advanced imaging facilities, including 3D and 4D scanning. The  
44 paediatric department includes all major subspecialties, including  
45 medical genetics, paediatric surgery, and paediatric cardiology.  
46  
47  
48  
49  
50  
51  
52  
53  
54  
55  
56  
57  
58  
59  
60



1  
2  
3  
4 **Study Design** (Figure 1). Observational, prospective cohort design  
5  
6 with a nested case-control study. The eligible cohort included  
7  
8 pregnancies of women who had their antenatal care and their routine  
9  
10 antenatal anomaly ultrasound scan examination (USS) between 18  
11  
12 weeks and 22 weeks of gestation at PSMMC from 1 July 2010  
13  
14 through 30 June 2013.

15  
16 In addition, Saudi women who are eligible for their antenatal care at  
17  
18 PSMMC but did not have antenatal screening ultrasound examination  
19  
20 and later delivered at PSMMC are included in the study.  
21  
22  
23  
24  
25

26 **Inclusions and Exclusions.** Pregnancy outcomes included in the study  
27  
28 were live births, stillbirths (fetal deaths at 20 weeks' gestation or  
29  
30 later), and pregnancies electively terminated because of fetal  
31  
32 anomalies (ETOPFA). The study excluded spontaneous abortions,  
33  
34 pregnancies referred from other hospitals because of a diagnosis of a  
35  
36 fetal anomaly, and babies with BD delivered elsewhere and referred  
37  
38 to PSMMC for evaluation and management.  
39  
40  
41  
42

43 **Evaluations.** Initial antenatal screening tests included a complete  
44  
45 blood count, liver and kidney function tests, blood group and  
46  
47 antibodies screening, rubella and toxoplasma status, hepatitis B  
48  
49 screen, random blood sugar and HbA1c level, VDRL, sickle cell screen  
50  
51 and urine analysis. A glucose tolerance test was done at 24-28 weeks  
52  
53 of gestation.  
54  
55  
56  
57  
58  
59  
60

1  
2  
3  
4  
5  
6 When a structural birth defect was diagnosed or suspected  
7  
8 antenatally, mothers were counseled by one of the investigators  
9  
10 (MSR, AMK), demographic and exposure information was gathered,  
11  
12 and both parents were scheduled within 2-4 weeks in a dedicated  
13  
14 clinic developed for the study. At that time, a detailed diagnostic and  
15  
16 care plan was developed, which may have included further blood  
17  
18 tests and fetal imaging, or amniocentesis, chorionic villous and/or  
19  
20 fetal blood sampling for genetic studies. Consent was requested for  
21  
22 cord blood collection for future molecular testing.  
23  
24  
25

26  
27 On the first day of life, all newborns in the cohort (with and without  
28  
29 birth defects) were examined by a pediatrician as part of the first  
30  
31 clinical screening examination. Babies with BD, whether identified  
32  
33 antenatally or postnatally, underwent diagnostic investigations as  
34  
35 clinically indicated (e.g., echocardiogram, cardiac catheterization, or  
36  
37 other imaging studies; metabolic and molecular testing) and were  
38  
39 referred to the appropriate subspecialists. A clinical geneticist  
40  
41 evaluated all babies with suspected syndromes or multiple birth  
42  
43 defects. A letter was distributed to all clinical departments describing  
44  
45 the study and requesting that they inform the study team about all  
46  
47 infants and children with BD born at PSMCC.  
48  
49  
50  
51

52  
53  
54 **Evaluations for specific BD.** If congenital heart disease (CHD) was  
55  
56 detected or suspected antenatally on USS examination, the mother  
57  
58  
59

1  
2  
3 was referred to the paediatric cardiologist for a fetal echocardiogram.  
4  
5 All these infants were also re-evaluated after birth by a pediatric  
6  
7 cardiologist. Isolated atrial septal defects (ASD II) were reevaluated at  
8  
9 6 to 12 months of age, and if at that time the echocardiogram  
10  
11 showed no evidence of ASD II at the time, the infant was not  
12  
13 considered a case. Congenital hydronephrosis (HN) was graded using  
14  
15 the Society of Fetal Urology grading system <sup>5</sup>. Babies with grade one  
16  
17 HN was given a repeat US examination within the first year of life; if it  
18  
19 had resolved, the baby was not considered a case. Chromosomal  
20  
21 analysis was done according to standard procedures, and a minimum  
22  
23 of 20 metaphases was analyzed (Applied imaging CytoVision  
24  
25 Karyotyping System). Reports followed the International System of  
26  
27 Human Cytogenetic Nomenclature (ISCN 2013). Molecular studies  
28  
29 were performed at Biocenthia health group in Germany  
30  
31 (<http://www.bioscientia.de/en/>), Mayo medical laboratories in the  
32  
33 United States, and Developmental Genetic laboratory at King Faisal  
34  
35 specialist hospital and research center in Saudi Arabia.  
36  
37  
38  
39  
40  
41  
42

43 **Nested Case-Control Study.** The nested case-control study included  
44  
45 as cases all women in the cohort with a pregnancy diagnosed with a  
46  
47 birth defect, and as controls a random sample of women in the  
48  
49 cohort with a normal USS. The random sample was generated daily  
50  
51 by taking the morning list of scheduled USS and using a random  
52  
53 number generator (<http://www.random.org>) to select potential  
54  
55 controls, so that the control sample would be eventually at least as  
56  
57  
58  
59  
60

1  
2  
3 large as the estimated total number of cases. If a woman initially  
4 selected as a control had a pregnancy diagnosed with a birth defect  
5 at the initial or later date, she was then included in the case group.  
6  
7 Investigators administered an in-person structured interview to case  
8 and control mothers. The interview included information on age (for  
9 both parents); weight before pregnancy; height; parity; family income  
10 (father's income or combined parental income if the mother worked);  
11 maternal education level (illiterate, primary school graduate,  
12 secondary school graduate, or university graduate); parental  
13 occupation (mother; housewife, teacher, student and others, father;  
14 soldier, officer or civilian employee); folic acid (FA) supplement use  
15 (regular use before and during 1<sup>st</sup> trimester of pregnancy; irregular or  
16 only post-conception use; no use or uncertain use per mother report);  
17 parental smoking (one or both parents smoking during current  
18 pregnancy); maternal radiation exposure during first trimester;  
19 maternal diabetes (overt or gestational) as defined by the  
20 International association of diabetes and pregnancy study groups <sup>6</sup>,  
21 and HbA1c level; family history of BD (in previous pregnancies and in  
22 maternal or paternal lineages); drug and medication use during the  
23 first trimester; chronic maternal systemic illnesses (hypothyroidism,  
24 epilepsy, depression, essential hypertension, and bronchial asthma).  
25 Consanguinity was defined as women being first or second cousins to  
26 their husbands.  
27  
28  
29  
30  
31  
32  
33  
34  
35  
36  
37  
38  
39  
40  
41  
42  
43  
44  
45  
46  
47  
48  
49  
50  
51  
52  
53  
54  
55  
56  
57  
58  
59  
60

1  
2  
3 **Follow up.** Case-infants (with BD) and control-infants were examined  
4 in the dedicated study clinic at 1, 6, 12, 18 and 24 months of age.  
5  
6 Two neonatologists and a clinical geneticist supervised the clinic.  
7  
8 Babies with BD also continued to be followed by the relevant  
9 subspecialty clinics. The remaining cohort (babies without birth  
10 defects not selected as controls) was re-examined at 4-8 weeks by  
11 the pediatrician for a second screening examination. A head  
12 ultrasound and a postductal pulse oximetry reading were completed  
13 in all babies attending the clinics. If the O<sub>2</sub> saturation was below 95%,  
14 the baby was referred to the pediatric cardiologist for evaluation. If  
15 any BD were detected at the second screening examination, the  
16 babies were referred to the genetics clinic for further evaluation and  
17 diagnosis. If the second screening examination proved to be normal,  
18 then no further follow up was arranged. However, if BD were  
19 discovered later in babies up to 2 years of age, they were included in  
20 the study.  
21  
22  
23  
24  
25  
26  
27  
28  
29  
30  
31  
32  
33  
34  
35  
36  
37  
38  
39  
40

41 **Case review, coding, classification.** BD were coded following the  
42 International Statistical Classification of Diseases and Related Health  
43 Problems, 10<sup>th</sup> revision, (ICD10, WHO-2010) according to EUROCAT  
44 recommended procedures <sup>7</sup>. We did not include isolated minor  
45 anomalies or prematurity-related conditions such as patent ductus  
46 arteriosus or hydrocephalus complicating intraventricular hemorrhage  
47 diagnosed in preterm babies (<37 completed weeks of gestation).  
48  
49 Data were entered in a version of EUROCAT Data Management  
50  
51  
52  
53  
54  
55  
56  
57  
58  
59  
60

1  
2  
3 Program (EDMP) modified to include control records and the  
4 additional variables generated by the case-control study and the  
5 follow up.  
6  
7  
8  
9

10  
11  
12 **Patient and public involvement:** Our long-time experience with the  
13 families and their offspring has helped us to shape the research  
14 question and the study design. All the families recruited were  
15 informed about the study objectives. None of the parents were  
16 involved in the study. The study results were disseminated to the  
17 community and professional health care provider through social  
18 media interviews, newspapers, presentation at various conference, and  
19 scientific publications.  
20  
21  
22  
23  
24  
25  
26  
27  
28  
29

30  
31  
32 **Institutional Ethics Review.** The study approved by the Ethical  
33 Committee of the PSMCC (Project No. 366, series of 2009).  
34  
35  
36  
37

38  
39 **Statistical analysis.** Proportions were compared with Chi-square or  
40 Fisher's exact tests. Odd ratios for BD were computed first via  
41 univariate logistic regression, then with a multiple logistic model. The  
42 latter was developed by first including uncorrelated significant factors  
43 ( $p < 0.05$ ) from the univariate analysis, then reducing the number of  
44 variables by stepwise backward elimination for a more parsimonious  
45 model. The final model included as covariates consanguinity,  
46 maternal age group, education level, diabetes and history of sib with  
47 congenital anomaly. Model fit was assessed with Hosmer and  
48  
49  
50  
51  
52  
53  
54  
55  
56  
57  
58  
59  
60

1  
2  
3 Lemeshow goodness of fit ( $p=0.08$ ). The Nagelkerke  $R^2$  was 0.055  
4 (explaining 6% of the effect on BD). Statistical analysis was done with  
5 SPSS for Windows, version 15 (SPSS Inc., Chicago, Illinois).  
6  
7  
8  
9

## 10 11 12 **Results**

13  
14 Of the 31 032 birth outcomes of the 30351 women followed since  
15 pregnancy, 30753 (99.1%) occurred at PSMHC (Figure 2). Of these,  
16 2107 were spontaneous abortions (6.9%) and were not included in  
17 the study, leaving 28646 eligible births (27726 singleton births and  
18 920 multiple births). The overall stillbirth rate was slightly less than 1  
19 percent (Figure 2).  
20  
21  
22  
23  
24  
25  
26  
27  
28  
29

30 **Birth defect occurrence, detection, and mortality** (Table 1). Of the  
31 28 646 eligible pregnancy outcomes, 1179 were diagnosed with a BD,  
32 for an overall prevalence of 412/10000 total births, or 1 in 24 births.  
33 Of these 1179 cases, 38 (3.2%) were stillbirths and 18 (1.5%) were  
34 electively terminated because of lethal malformations (13 with  
35 anencephaly, 3 with severe hydrops fetalis and cystic hygroma, 1 with  
36 Meckel-Gruber syndrome and 1 with bilateral renal agenesis). The  
37 antenatal detection rate among women who has had antenatal  
38 ultrasound screening examination was 70.6%(561/795), and in 90% of  
39 these (505/561) the diagnosis was made by ultrasound scan at 22  
40 weeks of gestation or later. Of the 618 babies diagnosed postnatally,  
41 296 (47.9%) were diagnosed at birth; 239 (38.7%) between 1-7 days,  
42 29 (4.7%) between 1-4 weeks, 52 (8.4%) between 1-12 months, and 2  
43  
44  
45  
46  
47  
48  
49  
50  
51  
52  
53  
54  
55  
56  
57  
58  
59  
60

1  
2  
3 (0.3%) after one year of age. Mortality among livebirths with BD  
4 (Table 1) was 14.1% in the first year, nearly half of which occurred in  
5 the first week of life, with a total mortality of 15.8% by the end of the  
6 second year of life. Mortality at two years was 0.9% in the unaffected  
7 cohort.  
8  
9  
10  
11  
12  
13  
14  
15

16 **Contribution of specific BD (Table 2).** Approximately half of the  
17 overall birth prevalence was due to congenital heart disease and  
18 central nervous system anomalies. Neural tube defects occurred at a  
19 rate of 1.9 per 1000 (1 in 526 births). Severe CHD occurred at a rate  
20 of 3.2 per 1000 (1 in 313 births) and accounted for 21.4% of all CHD  
21 cases. Chromosomal conditions whose risk is associated with  
22 increased maternal age (trisomies 21, 18, and 13) occurred at  
23 combined prevalence of 2.5 per 1000 (1 in 392 births), with trisomy  
24 21 accounting for most of the cases (2.2 per 1000 or 1 in 456 births).  
25  
26  
27  
28  
29  
30  
31  
32  
33  
34  
35  
36  
37

38 **Risk factors.** Figure 3 summarizes the frequency of selected maternal  
39 or parental risk factors for BD among controls in the nested case-  
40 control study. Among potentially modifiable factors, lack of  
41 periconceptional folic acid supplement use, consanguinity, high body  
42 mass index, advanced maternal age, smoking (first or second-hand)  
43 and maternal diabetes were particularly frequent. Nearly 6% of non-  
44 primiparous women had one prior child with a major BD. The nested  
45 case-control study (Table 3) detected overall increased odds ratios for  
46 all BD combined for consanguinity, advanced maternal age, high  
47  
48  
49  
50  
51  
52  
53  
54  
55  
56  
57  
58  
59  
60



1  
2  
3 parity, maternal diabetes, and positive family history of BD in a sib.  
4  
5 Increased odds ratios with confidence intervals including unity were  
6  
7 also found for maternal depression and hypertension (Table 3).  
8  
9  
10  
11  
12  
13  
14  
15  
16  
17  
18

## 19 **Discussion**

20  
21  
22  
23  
24 This longitudinal study of BD in a pregnancy cohort in Saudi Arabia  
25 followed from mid-gestation through age 2 years had three  
26 integrated aims: describe the population's risk factor profile,  
27 document the associated birth prevalence of BD, and assess survival  
28 as critical health outcome <sup>4</sup>. This information is crucial when planning  
29 and then evaluating policies and interventions, be they aimed at  
30 primary prevention (e.g., folic acid fortification) or at improving care  
31 of those affected.  
32  
33  
34  
35  
36  
37  
38  
39  
40  
41  
42

43  
44 In terms of the burden of BD, the study documented a remarkably  
45 high birth prevalence of 41.2 per 1000, or 1 in 24 total births. This  
46 rate is higher than that in many high-income countries, as reported  
47 by EUROCAT (26.1/1000 births)<sup>8</sup>, BINOCAR (20.6/1000 births)<sup>9</sup> and the  
48 Bradford (BIB) study (30.5/1000)<sup>10</sup>. It is also higher than previously  
49 reported from Saudi Arabia (11.5 to 25.7 per 1000 live births)<sup>11-13</sup>.  
50  
51  
52  
53  
54  
55  
56  
57  
58  
59  
60

1  
2  
3 Sallout and colleagues reported an antenatal BD prevalence of  
4 52.1/1000 pregnancy screened and 46.5/1000 LB<sup>14</sup>. These high  
5 prevalences are biased because of the inclusion of mothers referred  
6 from other institutions, which lead to an imprecise denominator. In  
7 addition, none of their cases discovered postnatally, which reflect an  
8 underestimation. In the current study findings could be related in part  
9 to methodological factors leading to better detection – for example,  
10 the follow-up starting in pregnancy and extending through the  
11 second year of life; the inclusion of stillbirths and elective termination  
12 of pregnancies for fetal anomalies (ETOPFA); and the inclusion of  
13 some genetic conditions that tend to be diagnosed after the newborn  
14 period.  
15

16  
17 However, the high prevalence is likely related also to the high  
18 frequency of adverse risk factors in the underlying population, as  
19 documented in the controls of the nested case-control study.  
20 Focusing on factors that are potentially modifiable, three factors seem  
21 to stand out. The first is insufficient folic acid use in this cohort  
22 (<10% in the periconceptional period). Concurrently, the rate of  
23 neural tube defects was 1.9 per 1000/births (Table 2), approximately  
24 three times higher to the rate of 0.6 per 1000/births that seems  
25 achievable by providing sufficient folic acid to women of childbearing  
26 age <sup>15,16</sup> . Although legislation for mandatory flour fortification had  
27 been in place in Saudi Arabia for years prior to this study (Kingdom  
28 of Saudi Arabia, 2000; Food fortification initiative, 2013)<sup>17,18</sup>, our data  
29 suggests that there are gaps in coverage or effectiveness, which could  
30  
31  
32  
33  
34  
35  
36  
37  
38  
39  
40  
41  
42  
43  
44  
45  
46  
47  
48  
49  
50  
51  
52  
53  
54  
55  
56  
57  
58  
59  
60

1  
2  
3  
4 be better documented with nutrition or blood folate surveys as a first  
5  
6 step for improvement. Because of the inclusion of stillbirths and  
7  
8 pregnancy terminations, this study also provides a fuller estimate of  
9  
10 the potential benefits of primary prevention, compared to if only  
11  
12 livebirths had been identified (representing just over half of all cases,  
13  
14 30/54).  
15

16  
17  
18 The second factor is maternal diabetes (Table 3). Diabetes is an  
19  
20 established risk factor for many BD and whose control before  
21  
22 conception is associated with a near normalization of BD risk <sup>6,19,20</sup>.  
23  
24 Several avenues for preventing diabetes and its health effects are  
25  
26 available, including population screening (many diabetic women are  
27  
28 undiagnosed), health care and counseling, and education on healthy  
29  
30 lifestyle and dietary choices starting from childhood. The current  
31  
32 reported prevalence in Saudi Arabia of overt diabetes in women  
33  
34 above age 40 years range from 7.7% – 21.7% <sup>21-23</sup>. In the study  
35  
36 cohort, overt diabetes was seen in 2% of women, and even higher in  
37  
38 women 30 years old or older. Al-Nozha and colleagues (Al-Nozha et  
39  
40 al., 2004) reported a prevalence of overt diabetes of 11.6% at 30-39  
41  
42 years and >22% at women of  $\geq 40$  years <sup>24</sup> compared to 2.7% and  
43  
44 7.1% in our study respectively. Though lower than these estimates,  
45  
46 the prevalence of overt diabetes in the study cohort is alarmingly  
47  
48 high.  
49  
50  
51  
52  
53  
54  
55  
56  
57  
58  
59  
60

1  
2  
3  
4 Third, we observed a high rate of parental consanguinity (54.5%),  
5 especially first-cousin marriages (48.0%). These marriages are  
6 common in many parts of the Middle East, Africa, and the Indian  
7 subcontinent<sup>25-27</sup>, with one estimate suggesting that “one billion  
8 people live in communities with a preference for consanguineous  
9 marriage” (Hamamy, 2012)<sup>26</sup>. This preference has deep social roots.  
10 Nevertheless, education combined with preconception and premarital  
11 counseling can be important prevention strategies, focusing on  
12 increasing awareness to allow couples to make more informed  
13 choices. Close consanguinity is a known risk factor for BD<sup>26</sup> as well as  
14 Mendelian conditions such as inborn errors of metabolism (occurring  
15 in 1 in 770 births in this study), confirmed prior reports from Saudi  
16 Arabia and the world literature<sup>28,29</sup>.

17  
18  
19  
20  
21  
22  
23  
24  
25  
26  
27  
28  
29  
30  
31  
32  
33  
34 Finally, the impact of BD in this population is reflected not  
35 only in the birth prevalence but also in the associated early  
36 mortality (Table 1), which was 15.8% by the second-year life  
37 (nearly all in the first year). Supporting the high impact of BD in  
38 early mortality is the study by Majeed-Saidan and colleagues,  
39 which showed that 36% of deaths in a large neonatal intensive  
40 care unit in Riyadh was due to lethal BD<sup>30</sup>. These findings  
41 highlight the need to improve care in addition to primary  
42 prevention, in order to improve survival associated with BD.  
43  
44  
45  
46  
47  
48  
49  
50  
51  
52  
53  
54  
55  
56  
57  
58  
59  
60

1  
2  
3 The study has some limitations. Because of the cohort  
4 design, the study sample did not allow a more detailed analysis  
5 of specific BD groups. Some key risk factors such folic acid  
6 insufficiency was based on maternal reports of supplement use  
7 rather than biomarkers. The pregnancy cohort was mainly from  
8 families of Saudi army personnel dependents. Although the  
9 Saudi Army recruits from all sectors of the Saudi society, a more  
10 generalized survey of the Saudi population would be ideal to  
11 assess gaps and opportunities for prevention and care.  
12  
13  
14  
15  
16  
17  
18  
19  
20  
21  
22  
23

24  
25 **Conclusion.** This longitudinal surveillance program that encompassed  
26 the causal chain from risk factors to health outcomes documented  
27 specific opportunities for primary prevention and for better care. Folic  
28 acid fortification, preconception diabetes screening, and  
29 consanguinity-related counseling could have significant health  
30 benefits, in this cohort and arguably in the larger Saudi population,  
31 particularly if associated with a national BD monitoring program to  
32 support and track the impact of interventions.  
33  
34  
35  
36  
37  
38  
39  
40  
41  
42  
43

#### 44 **Acknowledgments**

45 We thank the Medical Services Directorate of the Saudi Armed Forces  
46 and the PSMCC directorate for their support during the initiation and  
47 execution of the study; the study's advisory board (Eduardo Castilla,  
48 Pierpaolo Mastroiacovo, Esther Garne, Fowzan Alkuraya, and Wesam  
49 Kurdi) for advice and guidance throughout the study; and the study  
50  
51  
52  
53  
54  
55  
56  
57  
58  
59  
60

1  
2  
3 secretaries for their commitment and enthusiasm.  
4  
5  
6  
7  
8  
9  
10  
11

12 **Author's statement:**  
13

14  
15 **AMK** study conception and design, revised the manuscript. **MAMS**,  
16 study conception and design, drafting and revising the manuscript.,  
17  
18 **MSR**, study design, data collection. **AMH**, data collection, revised the  
19 manuscript. **LDB**, study design, critically revised the manuscript for  
20 intellectual content. **HSB**, statistical analysis and revised the  
21 manuscript. **ANA**, study design, data collection, revised the  
22 manuscript. All authors approved the submission of the manuscript.  
23  
24  
25  
26  
27  
28  
29  
30  
31  
32  
33

34 **Patient consent form:** n/a  
35  
36  
37

38 **Data sharing statement:**  
39

40 **Dataset can be obtained on request through a third party "King**  
41 **Abdulaziz city for science and technology.**  
42  
43  
44  
45  
46  
47  
48  
49  
50  
51  
52  
53  
54  
55  
56  
57  
58  
59  
60

1  
2  
3  
4  
5  
6  
7  
8  
9  
10  
11  
12  
13  
14  
15  
16  
17  
18  
19  
20  
21  
22  
23  
24  
25  
26  
27  
28  
29  
30  
31  
32  
33  
34  
35  
36  
37  
38  
39  
40  
41  
42  
43  
44  
45  
46  
47  
48  
49  
50  
51  
52  
53  
54  
55  
56  
57  
58  
59  
60

For peer review only

## References

1. World Health Organization. Sixty -Third World Health Assembly. Birth defects Report by the Secretariat, A63/10. Geneva, Switzerland: World Health Organization, 2010.

- 1  
2  
3  
4  
5  
6 2. World Health Organization. Global Health Observatory  
7 (GHO) data. Under-five mortality 2016.  
8 [http://www.who.int/gho/child\\_health/mortality/mortality\\_und](http://www.who.int/gho/child_health/mortality/mortality_under_five_text/en/)  
9 [er\\_five\\_text/en/](http://www.who.int/gho/child_health/mortality/mortality_under_five_text/en/) (accessed 12 December 2017).  
10  
11  
12  
13  
14  
15  
16
- 17 3. Christianson AL, Howson CP, Modell B. Global report on  
18 birth defects: the hidden toll of dying and disabled children.  
19 White Plains (NY): March of Dimes Defects Foundation 2006.  
20  
21  
22  
23  
24  
25
- 26 4. Botto LD, Mastroiacovo P. Triple surveillance: a proposal for  
27 an integrated strategy to support and accelerate birth  
28 defect prevention. *Ann. N. Y. Acad. Sci* 2018; (1414):126-36.  
29  
30  
31  
32  
33  
34
- 35 5. Avni FE, Maugey-Laulom B, Cassart M, *et al.* Fetal  
36 genitourinary tract. In: Callen PW, ed. *Ultrasonography in*  
37 *Obstetrics and Gynecology*. 5th Ed. New York: W.B.  
38 Saunders 2007; 640-75.  
39  
40  
41  
42  
43  
44  
45
- 46 6. Metzger BE, Gabbe SG, Persson B, *et al.* International  
47 association of diabetes and pregnancy study groups  
48 recommendations on the diagnosis and classification of  
49 hyperglycemia in pregnancy. *Diabetes Care* 2010; 33(3):  
50 676–82. doi: 10.2337/dc09-1848.  
51  
52  
53  
54  
55  
56  
57  
58  
59  
60



- 1  
2  
3  
4  
5  
6 7. EUROCAT. Eurocat Guide 1.3. Instructions for registration  
7 and surveillance of congenital anomalies. Belfast, Northern  
8 Ireland University of Ulster 2005. [http://www.eurocat-](http://www.eurocat-network.eu/content/Section%202.4-%2027_Oct2016.pdf)  
9 [network.eu/content/Section%202.4-%2027\\_Oct2016.pdf](http://www.eurocat-network.eu/content/Section%202.4-%2027_Oct2016.pdf)  
10  
11  
12  
13
- 14  
15  
16  
17 8. EUROCAT. Prevalence Tables, 2011-2015.  
18 [http://www.eurocat-](http://www.eurocat-network.eu/newprevdata/showPDF.aspx?winx=1896&winy=940&file=allsubgroups.aspx)  
19 [network.eu/newprevdata/showPDF.aspx?winx=1896&winy=9](http://www.eurocat-network.eu/newprevdata/showPDF.aspx?winx=1896&winy=940&file=allsubgroups.aspx)  
20 [40&file=allsubgroups.aspx](http://www.eurocat-network.eu/newprevdata/showPDF.aspx?winx=1896&winy=940&file=allsubgroups.aspx) 2015. (accessed 12 December  
21 2017).  
22  
23  
24
- 25  
26  
27 9. Springett A, Budd J, Draper ES, *et al.* Congenital Anomaly  
28 Statistics 2012 England and Wales, London 2014.  
29 [www.binocar.org/content/Annual%20report%202012\\_FINAL\\_](http://www.binocar.org/content/Annual%20report%202012_FINAL_nologo.pdf)  
30 [nologo.pdf](http://www.binocar.org/content/Annual%20report%202012_FINAL_nologo.pdf).  
31  
32  
33  
34  
35  
36  
37
- 38  
39 10. Sheridan E, Wright J, Small N, *et al.* Risk factors for  
40 congenital anomaly in a multiethnic birth cohort: an analysis  
41 of the Born in Bradford study. *Lancet* 2013; 382(9901):  
42 1350–9. doi: 10.1016/S0140-6736(13)61132-0.  
43  
44  
45  
46  
47  
48
- 49  
50 11. Al Bu Ali WH, Balaha MH, Al Moghannum MS, *et al.* Risk  
51 factors and birth prevalence of birth defects and inborn  
52 errors of metabolism in Al Ahsa, Saudi Arabia. *Pan Afr Med*  
53 *J* 2011; 8: 14.  
54  
55  
56  
57  
58  
59  
60

- 1  
2  
3  
4  
5  
6 12. Fida NM, Al-Aama J, Nichols W, *et al.* A prospective study  
7 of congenital malformations among live born neonates at a  
8 University Hospital in Western Saudi Arabia. *Saudi Med J*  
9 2007; 28(9): 1367–73.  
10  
11  
12  
13  
14  
15  
16 13. Refat MY, Al-Moghanem M, McDonald, *et al.* Major birth  
17 defects at King Fahd Hofuf Hospital: Prevalence, risk factors  
18 and outcome. *Ann Saudi Med* 1995; 15(4): 339–43.  
19  
20  
21  
22  
23  
24  
25 14. Sallout B, Obedat N, Shakeel F, *et al.* Prevalence of major  
26 congenital anomalies at King Fahad Medical City in Saudi  
27 Arabia: a tertiary care centre-based study. *Ann Saudi Med*  
28 2015; 35(5): 343–51.  
29  
30  
31  
32  
33  
34  
35  
36 15. Kancherla V, Oakley GP Jr, *et al.* Urgent global  
37 opportunities to prevent birth defects. *Semin Fetal Neonatal*  
38 *Med* 2014; 19(3): 153–60.  
39  
40  
41  
42  
43  
44  
45 16. Youngblood ME, Williamson R, Bell KN, *et al.* Update on  
46 global prevention of folic acid-preventable spina bifida and  
47 anencephaly. *Birth Defects Res A Clin Mol Teratol* 2013;  
48 97(10): 658–63. doi: 10.1002/bdra.23166. Epub 2013.  
49  
50  
51  
52  
53  
54  
55  
56  
57  
58  
59  
60

- 1  
2  
3  
4 17. Kingdom of Saudi Arabia, Ministry of health, Nutritional  
5 department directive. Number 652/1/26, 2000; 13/09/2000.  
6  
7  
8  
9  
10 18. Food Fortification Initiative. (2013).  
11 [http://www.ffinetwork.org/country\\_profiles/country.php?reco](http://www.ffinetwork.org/country_profiles/country.php?record=194)  
12 [rd=194](http://www.ffinetwork.org/country_profiles/country.php?record=194) (accessed 12 December 2017).  
13  
14  
15  
16  
17  
18 19. Kitzmiller JL, Wallerstein R, Correa A, *et al*. Preconception  
19 care for women with diabetes and prevention of major  
20 congenital malformations. *Birth Defects Res A Clin Mol*  
21 *Teratol* 2010; 88(10): 791–03. doi: 10.1002/bdra.20734.  
22  
23  
24  
25  
26  
27 20. Simeone RM, Devine OJ, Marcinkevage JA, *et al* Diabetes  
28 and congenital heart defects: a systematic review, meta-  
29 analysis, and modeling project. *Am J Prev Med* 2014; 48(2):  
30 195–204. doi: 10.1016/j.amepre.2014.09.002.  
31  
32  
33  
34  
35  
36  
37  
38 21. Al-Nuaim AR, Al-Rubean K, Al-Mazrou Y, *et al*. Prevalence  
39 of diabetes mellitus, obesity and hypercholesterolemia in  
40 Saudi Arabia: national chronic disease survey. Riyadh (KSA):  
41 Ministry of Health and King Saud University. ISBN: 1995;  
42 9960-603-01-6.  
43  
44  
45  
46  
47  
48  
49  
50 22. El-Hazmi M, Warsy A, Al-Swailem AR, *et al*. Diabetes  
51 mellitus as a health problem in Saudi Arabia. *East Mediterr*  
52 *Health J* 1998 (4): 58–67.  
53  
54  
55  
56  
57  
58  
59  
60

- 1  
2  
3  
4  
5  
6 23. Warsy AS, el-Hazmi MA. Diabetes mellitus, hypertension  
7 and obesity--common multifactorial disorders in Saudis.  
8 East Mediterr Health J 1999; 5(6): 1236–42.  
9  
10  
11  
12  
13  
14 24. Al-Nozha MM, Al-Maatouq M, Al-Mazrou YY.] *et al.*  
15 Diabetes mellitus in Saudi Arabia. Saudi Med J 2004; 25(11):  
16 1603–10.  
17  
18  
19  
20  
21  
22  
23 25. El-Mouzan MI, Al-Salloum AA, Al-Herbish AS, et al.  
24 Regional variations in the prevalence of consanguinity in  
25 Saudi Arabia. Saudi Med J 2007; 28(12): 1881–4.  
26  
27  
28  
29  
30  
31  
32 26. Hamamy H. Consanguineous marriages: Preconception  
33 consultation in primary health care settings. J Community  
34 Genet 2012; 3(3): 185–92.  
35  
36  
37  
38  
39  
40  
41 27. Majeed-Saidan MA, Ammari AN, AlHashem AM, *et al.*  
42 Effect of consanguinity on birth defects in Saudi women:  
43 results from a nested case-control study. Birth Defects Res  
44 A Clin Mol Teratol 2015; 103(2): 100–4. doi:  
45 10.1002/bdra.23331.  
46  
47  
48  
49  
50  
51  
52  
53  
54 28. Mak CM, Lee HC, Chan AY, *et al.* Inborn errors of  
55 metabolism and expanded newborn screening: review and  
56  
57  
58  
59  
60

update. *Crit Rev Clin Lab Sci* 2013; 50(6): 142–62. doi:  
10.3109/10408363.2013.847896.

29. Moammar H, Cheriyan G, Mathew R, *et al*. Incidence and patterns of inborn errors of metabolism in the Eastern Province of Saudi Arabia, 1983-2008. *Ann Saudi Med* 2010; 30(4): 271–7. doi: 10.4103/0256-4947.65254.
30. Majeed-Saidan MA, Kashlan FT, Al-Zahrani AA, *et al*. Pattern of neonatal and postneonatal deaths over a decade (1995--2004) at a Military Hospital in Saudi Arabia. *Saudi Med J* 2008; 29(6):879-83.

## Tables

Legend: Table 1 Distribution and rates of birth defects among the cohort's pregnancy outcomes, and associated mortality.

| Total | With birth defects | Mortality among babies with birth defects |             |                   |
|-------|--------------------|-------------------------------------------|-------------|-------------------|
|       |                    | Overall<br>(0-2<br>years)                 | 1st<br>week | Total 1st<br>year |

| Birth outcome       | No    | %   | No.  | %    | Rate /100 | No. | %    | No. | %    | No. | %   | No. | %    |
|---------------------|-------|-----|------|------|-----------|-----|------|-----|------|-----|-----|-----|------|
| Live births         | 28376 | 99  | 1123 | 95.3 | 4.0       | 505 | 45.0 | 177 | 15.8 | 64  | 5.7 | 158 | 14.1 |
| Stillbirths         | 252   | 0.9 | 38   | 3.2  | 15.1      | 38  | 100  |     |      |     |     |     |      |
| ETOPFA <sup>†</sup> | 18    | 0.1 | 18   | 1.5  | 100       | 18  | 100  |     |      |     |     |     |      |
| Total               | 28646 | 100 | 1179 | 100  | 4.1       | 561 | 47.6 |     |      |     |     |     |      |

Footnote:

<sup>†</sup>ETOPFA, Terminations of Pregnancy for Fetal Anomalies.

Stillbirth (fetal death at 20 weeks of gestation or greater).

Legend: Table 2 Prevalence and distribution of BDs, overall and by pregnancy outcome.

| Birth defects                     | Number† | %    | Prevalence                             |      | Live birth |     | Stillbirth |     | ETOPFA |  |
|-----------------------------------|---------|------|----------------------------------------|------|------------|-----|------------|-----|--------|--|
|                                   |         |      | per 1000 births (total births = 28646) | No.  | (%)        | No. | (%)        | No. | (%)    |  |
| Any                               | 1179    | 100  | 41.2                                   | 1123 | 95.3       | 38  | 3.2        | 18  | 1.5    |  |
| Nervous system                    | 160     | 13.6 | 5.6                                    | 129  | 80.6       | 18  | 11.3       | 13  | 8.1    |  |
| Neural Tube Defects               | 54      | 4.6  | 1.9                                    | 30   | 55.5       | 11  | 20.4       | 13  | 24.1   |  |
| Anencephalus                      | 26      | 2.2  | 0.9                                    | 7    | 26.9       | 8   | 30.8       | 11  | 42.3   |  |
| Encephalocele                     | 11      | 0.9  | 0.4                                    | 9    | 81.8       | 1   | 9.1        | 1   | 9.1    |  |
| Spina Bifida                      | 17      | 1.4  | 0.6                                    | 14   | 82.4       | 2   | 11.8       | 1   | 5.9    |  |
| Hydrocephaly                      | 25      | 2.1  | 0.9                                    | 23   | 92.0       | 2   | 8.0        |     |        |  |
| Microcephaly                      | 28      | 2.4  | 1.0                                    | 24   | 85.7       | 4   | 14.3       |     |        |  |
| Eye                               | 33      | 2.8  | 1.2                                    | 33   | 100        |     |            |     |        |  |
| Anophthalmus/microphthalmus       | 11      | 0.9  | 0.4                                    | 11   | 100        |     |            |     |        |  |
| Congenital cataract               | 5       | 0.4  | 0.2                                    | 5    | 100        |     |            |     |        |  |
| Congenital glaucoma               | 9       | 0.8  | 0.3                                    | 9    | 100        |     |            |     |        |  |
| Ear, face and neck                | 7       | 0.6  | 0.2                                    | 7    | 100        |     |            |     |        |  |
| Anotia/microtia                   | 7       | 0.6  | 0.2                                    | 7    | 100        |     |            |     |        |  |
| Cardiac                           | 425     | 36.0 | 14.8                                   | 420  | 90.9       | 4   | 0.9        |     |        |  |
| Severe congenital heart defects ‡ | 91      | 7.7  | 3.2                                    | 89   | 97.8       | 2   | 2.2        |     |        |  |
| Common arterial truncus           | 3       | 0.3  | 0.1                                    | 3    | 100        |     |            |     |        |  |

|    |                                         |     |      |     |     |      |   |      |       |
|----|-----------------------------------------|-----|------|-----|-----|------|---|------|-------|
| 1  |                                         |     |      |     |     |      |   |      |       |
| 2  |                                         |     |      |     |     |      |   |      |       |
| 3  | Transposition of great vessels          | 13  | 1.1  | 0.5 | 13  | 100  |   |      |       |
| 4  |                                         |     |      |     |     |      |   |      |       |
| 5  | Single ventricle                        | 6   | 0.5  | 0.2 | 6   | 100  |   |      |       |
| 6  |                                         |     |      |     |     |      |   |      |       |
| 7  |                                         |     |      |     |     |      |   |      |       |
| 8  | Atrioventricular septal defect          | 17  | 1.4  | 0.6 | 15  | 88.2 | 2 | 11.8 |       |
| 9  |                                         |     |      |     |     |      |   |      |       |
| 10 | Tetralogy of Fallot                     | 15  | 1.3  | 0.5 | 15  | 100  |   |      |       |
| 11 |                                         |     |      |     |     |      |   |      |       |
| 12 | Tricuspid atresia and stenosis          | 4   | 0.3  | 0.1 | 4   | 100  |   |      |       |
| 13 |                                         |     |      |     |     |      |   |      |       |
| 14 |                                         |     |      |     |     |      |   |      |       |
| 15 | Pulmonary valve stenosis                | 22  | 1.9  | 0.8 | 21  | 95.5 | 1 | 4.5  |       |
| 16 |                                         |     |      |     |     |      |   |      |       |
| 17 | Pulmonary valve atresia                 | 9   | 0.8  | 0.3 | 9   | 100  |   |      |       |
| 18 |                                         |     |      |     |     |      |   |      |       |
| 19 | Aortic valve atresia/stenosis           | 5   | 0.4  | 0.2 | 5   | 100  |   |      |       |
| 20 |                                         |     |      |     |     |      |   |      |       |
| 21 |                                         |     |      |     |     |      |   |      |       |
| 22 | Hypoplastic left heart                  | 15  | 1.3  | 0.5 | 15  | 100  |   |      |       |
| 23 |                                         |     |      |     |     |      |   |      |       |
| 24 | Hypoplastic right heart                 | 5   | 0.4  | 0.2 | 5   | 100  |   |      |       |
| 25 |                                         |     |      |     |     |      |   |      |       |
| 26 | Coarctation of aorta                    | 14  | 1.2  | 0.5 | 14  | 100  |   |      |       |
| 27 |                                         |     |      |     |     |      |   |      |       |
| 28 |                                         |     |      |     |     |      |   |      |       |
| 29 | Total anomalous pulmonary venous        |     | 0.2  |     |     |      |   |      |       |
| 30 | return                                  | 2   |      | 0.1 | 2   | 100  |   |      |       |
| 31 |                                         |     |      |     |     |      |   |      |       |
| 32 |                                         |     |      |     |     |      |   |      |       |
| 33 | Ventricular septal defect               | 171 | 14.5 | 6.0 | 171 | 100  |   |      |       |
| 34 |                                         |     |      |     |     |      |   |      |       |
| 35 | Atrial septal defect                    | 214 | 18.2 | 7.5 | 214 | 100  |   |      |       |
| 36 |                                         |     |      |     |     |      |   |      |       |
| 37 | Oro-facial clefts                       |     |      |     |     |      |   |      |       |
| 38 |                                         |     |      |     |     |      |   |      |       |
| 39 |                                         |     |      |     |     |      |   |      |       |
| 40 | Cleft lip with or without palate        | 42  | 3.6  | 1.5 | 35  | 83.3 | 5 | 11.9 | 2 4.8 |
| 41 |                                         |     |      |     |     |      |   |      |       |
| 42 | Cleft palate only                       | 11  | 0.9  | 0.4 | 11  | 100  |   |      |       |
| 43 |                                         |     |      |     |     |      |   |      |       |
| 44 | Respiratory                             | 33  | 2.8  | 1.2 | 33  | 100  |   |      |       |
| 45 |                                         |     |      |     |     |      |   |      |       |
| 46 | Choanal atresia                         | 5   | 0.4  | 0.2 | 5   | 100  |   |      |       |
| 47 |                                         |     |      |     |     |      |   |      |       |
| 48 |                                         |     |      |     |     |      |   |      |       |
| 49 | Digestive system                        | 74  | 6.3  | 2.6 | 71  | 95.9 | 3 | 4.1  |       |
| 50 |                                         |     |      |     |     |      |   |      |       |
| 51 | Esophageal atresia with/without fistula | 12  | 1.0  | 0.4 | 12  | 100  |   |      |       |
| 52 |                                         |     |      |     |     |      |   |      |       |
| 53 |                                         |     |      |     |     |      |   |      |       |
| 54 | Ano-rectal atresia and stenosis         | 26  | 2.2  | 0.9 | 25  | 96.2 | 1 | 3.8  |       |
| 55 |                                         |     |      |     |     |      |   |      |       |
| 56 |                                         |     |      |     |     |      |   |      |       |
| 57 |                                         |     |      |     |     |      |   |      |       |
| 58 |                                         |     |      |     |     |      |   |      |       |
| 59 |                                         |     |      |     |     |      |   |      |       |
| 60 |                                         |     |      |     |     |      |   |      |       |



|    |                                  |     |      |      |     |      |   |      |   |      |
|----|----------------------------------|-----|------|------|-----|------|---|------|---|------|
| 1  |                                  |     |      |      |     |      |   |      |   |      |
| 2  |                                  |     |      |      |     |      |   |      |   |      |
| 3  | Diaphragmatic hernia             | 18  | 1.5  | 0.6  | 16  | 88.9 | 2 | 11.1 |   |      |
| 4  |                                  |     |      |      |     |      |   |      |   |      |
| 5  | Abdominal wall defects           | 7   | 0.6  | 0.2  | 6   | 85.7 | 1 | 14.3 |   |      |
| 6  |                                  |     |      |      |     |      |   |      |   |      |
| 7  |                                  |     |      |      |     |      |   |      |   |      |
| 8  | Gastroschisis                    | 2   | 0.2  | 0.1  | 1   | 50.0 | 1 | 50.0 |   |      |
| 9  |                                  |     |      |      |     |      |   |      |   |      |
| 10 | Omphalocele                      | 5   | 0.4  | 0.2  | 5   | 100  |   |      |   |      |
| 11 |                                  |     |      |      |     |      |   |      |   |      |
| 12 | Urinary                          | 323 | 27.4 | 11.3 | 318 | 98.5 | 4 | 1.2  | 1 | 0.3  |
| 13 |                                  |     |      |      |     |      |   |      |   |      |
| 14 |                                  |     |      |      |     |      |   |      |   |      |
| 15 | Bilateral renal agenesis         | 18  | 1.5  | 0.6  | 15  | 83.3 | 2 | 11.1 | 1 | 5.6  |
| 16 |                                  |     |      |      |     |      |   |      |   |      |
| 17 | Renal dysplasia                  | 60  | 5.1  | 2.1  | 58  | 96.7 | 2 | 3.3  |   |      |
| 18 |                                  |     |      |      |     |      |   |      |   |      |
| 19 | Congenital hydronephrosis        | 194 | 16.5 | 6.8  | 194 | 100  |   |      |   |      |
| 20 |                                  |     |      |      |     |      |   |      |   |      |
| 21 |                                  |     |      |      |     |      |   |      |   |      |
| 22 | Genital                          | 127 | 10.8 | 4.4  | 126 | 99.2 | 1 | 0.8  |   |      |
| 23 |                                  |     |      |      |     |      |   |      |   |      |
| 24 | Hypospadias                      | 108 | 9.2  | 3.8  | 108 | 100  |   |      |   |      |
| 25 |                                  |     |      |      |     |      |   |      |   |      |
| 26 |                                  |     |      |      |     |      |   |      |   |      |
| 27 | Indeterminate sex                | 3   | 0.3  | 0.1  | 2   | 66.7 | 1 | 33.3 |   |      |
| 28 |                                  |     |      |      |     |      |   |      |   |      |
| 29 | Limb                             | 99  | 8.4  | 3.5  | 92  | 92.9 | 4 | 4.0  | 3 | 3.0  |
| 30 |                                  |     |      |      |     |      |   |      |   |      |
| 31 | Limb deficiencies, all           | 17  | 1.4  | 0.6  | 17  | 100  |   |      |   |      |
| 32 |                                  |     |      |      |     |      |   |      |   |      |
| 33 |                                  |     |      |      |     |      |   |      |   |      |
| 34 | Upper limb deficiency            | 12  | 1.0  | 0.4  | 12  | 100  |   |      |   |      |
| 35 |                                  |     |      |      |     |      |   |      |   |      |
| 36 | Lower limb deficiency            | 7   | 0.6  | 0.2  | 7   | 100  |   |      |   |      |
| 37 |                                  |     |      |      |     |      |   |      |   |      |
| 38 | Club foot - talipes equinovarus  | 19  | 1.6  | 0.7  | 15  | 78.9 | 2 | 10.5 | 2 | 10.5 |
| 39 |                                  |     |      |      |     |      |   |      |   |      |
| 40 | Hip dislocation and/or dysplasia | 24  | 2.0  | 0.8  | 23  | 95.8 |   |      | 1 | 4.2  |
| 41 |                                  |     |      |      |     |      |   |      |   |      |
| 42 |                                  |     |      |      |     |      |   |      |   |      |
| 43 | Polydactyly                      | 23  | 2.0  | 0.8  | 23  | 100  |   |      |   |      |
| 44 |                                  |     |      |      |     |      |   |      |   |      |
| 45 | Syndactyly                       | 9   | 0.8  | 0.3  | 9   | 100  |   |      |   |      |
| 46 |                                  |     |      |      |     |      |   |      |   |      |
| 47 |                                  |     |      |      |     |      |   |      |   |      |
| 48 | Musculo-skeletal                 | 40  | 3.4  | 1.4  | 33  | 82.5 | 7 | 17.5 |   |      |
| 49 |                                  |     |      |      |     |      |   |      |   |      |
| 50 | Craniosynostosis                 | 6   | 0.5  | 0.2  | 6   | 100  |   |      |   |      |
| 51 |                                  |     |      |      |     |      |   |      |   |      |
| 52 | Achondroplasia                   | 3   | 0.3  | 0.1  | 2   | 66.7 | 1 | 33.3 |   |      |
| 53 |                                  |     |      |      |     |      |   |      |   |      |
| 54 |                                  |     |      |      |     |      |   |      |   |      |
| 55 | Thanatophoric dysplasia          | 2   | 0.2  | 0.1  | 2   | 100  |   |      |   |      |
| 56 |                                  |     |      |      |     |      |   |      |   |      |
| 57 |                                  |     |      |      |     |      |   |      |   |      |
| 58 |                                  |     |      |      |     |      |   |      |   |      |
| 59 |                                  |     |      |      |     |      |   |      |   |      |
| 60 |                                  |     |      |      |     |      |   |      |   |      |

|    |                                                                                  |    |     |      |    |      |   |      |   |     |
|----|----------------------------------------------------------------------------------|----|-----|------|----|------|---|------|---|-----|
| 1  |                                                                                  |    |     |      |    |      |   |      |   |     |
| 2  |                                                                                  |    |     |      |    |      |   |      |   |     |
| 3  | Jeune syndrome                                                                   | 2  | 0.2 | 0.1  | 1  | 50.0 | 1 | 50.5 |   |     |
| 4  |                                                                                  |    |     |      |    |      |   |      |   |     |
| 5  | Other malformations                                                              | 42 | 3.6 | 1.5  | 40 | 95.2 | 1 | 2.4  | 1 | 2.4 |
| 6  |                                                                                  |    |     |      |    |      |   |      |   |     |
| 7  |                                                                                  |    |     |      |    |      |   |      |   |     |
| 8  | Situs inversus                                                                   | 10 | 0.8 | 0.3  | 10 | 100  |   |      |   |     |
| 9  |                                                                                  |    |     |      |    |      |   |      |   |     |
| 10 | By underlying cause                                                              |    |     |      |    |      |   |      |   |     |
| 11 |                                                                                  |    |     |      |    |      |   |      |   |     |
| 12 | Chromosomal                                                                      | 82 | 7.0 | 2.9  | 79 | 96.3 | 3 | 3.7  |   |     |
| 13 |                                                                                  |    |     |      |    |      |   |      |   |     |
| 14 |                                                                                  |    |     |      |    |      |   |      |   |     |
| 15 | Down Syndrome/trisomy 21                                                         | 63 | 5.3 | 2.2  | 62 | 98.4 | 1 | 1.6  |   |     |
| 16 |                                                                                  |    |     |      |    |      |   |      |   |     |
| 17 | Edward syndrome/trisomy 18                                                       | 8  | 0.7 | 0.3  | 7  | 87.5 | 1 | 12.5 |   |     |
| 18 |                                                                                  |    |     |      |    |      |   |      |   |     |
| 19 | Patau syndrome/trisomy 13                                                        | 2  | 0.2 | 0.1  | 2  | 100  |   |      |   |     |
| 20 |                                                                                  |    |     |      |    |      |   |      |   |     |
| 21 |                                                                                  |    |     |      |    |      |   |      |   |     |
| 22 | Turner syndrome                                                                  | 3  | 0.3 | 0.1  | 2  | 66.7 | 1 | 33.3 |   |     |
| 23 |                                                                                  |    |     |      |    |      |   |      |   |     |
| 24 | Wolff-Hirschhorn syndrome                                                        | 1  | 0.1 | 0.03 | 1  | 100  |   |      |   |     |
| 25 |                                                                                  |    |     |      |    |      |   |      |   |     |
| 26 |                                                                                  |    |     |      |    |      |   |      |   |     |
| 27 | Genetic syndromes (including                                                     |    |     |      |    |      |   |      |   |     |
| 28 | microdeletions)                                                                  | 38 | 3.2 | 1.3  | 36 | 94.7 | 1 | 2.6  | 1 | 2.6 |
| 29 |                                                                                  |    |     |      |    |      |   |      |   |     |
| 30 | Teratogenic (Carbamazepine                                                       |    |     |      |    |      |   |      |   |     |
| 31 | embryopathy)                                                                     | 1  | 0.1 | 0.1  | 1  | 100  |   |      |   |     |
| 32 |                                                                                  |    |     |      |    |      |   |      |   |     |
| 33 |                                                                                  |    |     |      |    |      |   |      |   |     |
| 34 | Conditions outside Q chapter of ICD-10                                           |    |     |      |    |      |   |      |   |     |
| 35 |                                                                                  |    |     |      |    |      |   |      |   |     |
| 36 |                                                                                  |    |     |      |    |      |   |      |   |     |
| 37 | Inborn error of metabolism                                                       | 37 | 3.1 | 1.3  | 37 | 100  |   |      |   |     |
| 38 |                                                                                  |    |     |      |    |      |   |      |   |     |
| 39 | Endocrine disorders                                                              | 7  | 0.6 | 0.2  | 7  | 100  |   |      |   |     |
| 40 |                                                                                  |    |     |      |    |      |   |      |   |     |
| 41 | Other                                                                            | 11 | 0.9 | 0.4  | 11 | 100  |   |      |   |     |
| 42 |                                                                                  |    |     |      |    |      |   |      |   |     |
| 43 |                                                                                  |    |     |      |    |      |   |      |   |     |
| 44 |                                                                                  |    |     |      |    |      |   |      |   |     |
| 45 |                                                                                  |    |     |      |    |      |   |      |   |     |
| 46 |                                                                                  |    |     |      |    |      |   |      |   |     |
| 47 | Footnote:                                                                        |    |     |      |    |      |   |      |   |     |
| 48 |                                                                                  |    |     |      |    |      |   |      |   |     |
| 49 | † The total number of birth defects is greater than the total number of affected |    |     |      |    |      |   |      |   |     |
| 50 | births because some had more than one major BD.                                  |    |     |      |    |      |   |      |   |     |
| 51 |                                                                                  |    |     |      |    |      |   |      |   |     |
| 52 |                                                                                  |    |     |      |    |      |   |      |   |     |
| 53 |                                                                                  |    |     |      |    |      |   |      |   |     |
| 54 |                                                                                  |    |     |      |    |      |   |      |   |     |
| 55 |                                                                                  |    |     |      |    |      |   |      |   |     |
| 56 |                                                                                  |    |     |      |    |      |   |      |   |     |
| 57 |                                                                                  |    |     |      |    |      |   |      |   |     |
| 58 |                                                                                  |    |     |      |    |      |   |      |   |     |
| 59 |                                                                                  |    |     |      |    |      |   |      |   |     |
| 60 |                                                                                  |    |     |      |    |      |   |      |   |     |

## Footnote:

† The total number of birth defects is greater than the total number of affected births because some had more than one major BD.

1  
2  
3 ‡ Severe congenital heart disease (EUROCAT definition): common arterial trunk  
4 (Q200), double outlet right ventricle (Q201), transposition of great arteries  
5 (Q203), single ventricle (Q204), atrioventricular septal defect (AVSD) (Q212),  
6 tetralogy of Fallot (Q213), pulmonary valve atresia (Q220), Ebstein anomaly  
7 (Q225), hypoplastic right heart (Q226), aortic valve atresia and stenosis (Q230),  
8 mitral valve anomalies (Q232, Q233), hypoplastic left heart (Q234), coarctation of  
9 the aorta (Q251), aortic atresia / interrupted aortic arch (Q252), total anomalous  
10 pulmonary venous return (Q262).  
11  
12  
13  
14  
15  
16  
17  
18  
19  
20  
21  
22  
23  
24  
25  
26  
27  
28  
29  
30  
31  
32  
33  
34  
35  
36  
37  
38  
39  
40  
41  
42  
43  
44  
45  
46  
47  
48  
49  
50  
51  
52  
53  
54  
55  
56  
57  
58  
59  
60

Legend: Table 3 Distribution of parental socio-demographic characteristics and association with birth defect risk.

| Variable             | Cases<br>(total n=1179) |      | Controls<br>(total n=1262) |      | Odds<br>Ratio <sup>†</sup> | 95% CI |       |
|----------------------|-------------------------|------|----------------------------|------|----------------------------|--------|-------|
|                      | No.                     | %    | No.                        | %    |                            | Lower  | Upper |
|                      | Consanguinity           |      |                            |      |                            |        |       |
| Non-consanguineous   | 537                     | 45.5 | 693                        | 54.9 | Ref                        | -      | -     |
| Consanguineous       | 642                     | 54.5 | 569                        | 45.1 | 1.5                        | 1.30   | 1.8   |
| Maternal age (years) |                         |      |                            |      |                            |        |       |
| <20                  | 24                      | 2.0  | 48                         | 3.8  | 0.58                       | 0.35   | 0.96  |
| 20-30                | 599                     | 50.8 | 694                        | 55.0 | Ref                        | -      | -     |
| 31-40                | 473                     | 40.1 | 474                        | 37.6 | 1.16                       | 0.98   | 1.37  |
| >40                  | 83                      | 7.0  | 46                         | 3.6  | 2.09                       | 1.43   | 3.05  |
| Paternal age (years) |                         |      |                            |      |                            |        |       |
| 20-30                | 341                     | 28.9 | 403                        | 31.9 | 0.92                       | 0.76   | 1.10  |
| 31-40                | 548                     | 46.5 | 593                        | 47.0 | Ref                        | -      | -     |
| 41-50                | 240                     | 20.4 | 225                        | 17.8 | 1.15                       | 0.93   | 1.43  |
| > 50                 | 50                      | 4.2  | 41                         | 3.2  | 1.32                       | 0.86   | 2.03  |

|    |                                            |      |      |      |      |      |      |      |
|----|--------------------------------------------|------|------|------|------|------|------|------|
| 1  |                                            |      |      |      |      |      |      |      |
| 2  |                                            |      |      |      |      |      |      |      |
| 3  | Maternal body mass index <sup>†</sup>      |      |      |      |      |      |      |      |
| 4  |                                            |      |      |      |      |      |      |      |
| 5  | <18.5                                      | 24   | 2.1  | 35   | 2.8  | 0.75 | 0.44 | 1.29 |
| 6  |                                            |      |      |      |      |      |      |      |
| 7  | 18.5-24.99                                 | 324  | 27.8 | 388  | 30.8 | 0.91 | 0.74 | 1.12 |
| 8  |                                            |      |      |      |      |      |      |      |
| 9  | 25.0-29.99                                 | 352  | 30.2 | 385  | 30.5 | Ref  | -    | -    |
| 10 |                                            |      |      |      |      |      |      |      |
| 11 | ≥30                                        | 464  | 39.9 | 453  | 35.9 | 1.12 | 0.92 | 1.36 |
| 12 |                                            |      |      |      |      |      |      |      |
| 13 |                                            |      |      |      |      |      |      |      |
| 14 | Previous deliveries (parity)               |      |      |      |      |      |      |      |
| 15 |                                            |      |      |      |      |      |      |      |
| 16 | Nulliparous                                | 216  | 18.3 | 273  | 21.6 | 0.92 | 0.74 | 1.16 |
| 17 |                                            |      |      |      |      |      |      |      |
| 18 | Para 1-2                                   | 374  | 31.7 | 436  | 34.5 | Ref  | -    | -    |
| 19 |                                            |      |      |      |      |      |      |      |
| 20 | Para 3-4                                   | 283  | 24.0 | 273  | 21.6 | 1.21 | 0.97 | 1.50 |
| 21 |                                            |      |      |      |      |      |      |      |
| 22 | Para ≥5                                    | 306  | 26.0 | 280  | 22.2 | 1.27 | 1.03 | 1.58 |
| 23 |                                            |      |      |      |      |      |      |      |
| 24 |                                            |      |      |      |      |      |      |      |
| 25 | Family monthly income Saudi riyals (US \$) |      |      |      |      |      |      |      |
| 26 |                                            |      |      |      |      |      |      |      |
| 27 | <3,000 SR (<800\$)                         | 19   | 1.9  | 12   | 1.0  | 1.87 | 0.89 | 3.92 |
| 28 |                                            |      |      |      |      |      |      |      |
| 29 | 10,000-14,000 SR (2667-3999\$)             | 235  | 23.2 | 277  | 22.3 | Ref  | -    | -    |
| 30 |                                            |      |      |      |      |      |      |      |
| 31 | 3,000-6,999 SR (800-1866\$)                | 232  | 22.9 | 291  | 23.4 | 0.94 | 0.74 | 1.20 |
| 32 |                                            |      |      |      |      |      |      |      |
| 33 | 7,000-9,999 SR (1867-2666\$)               | 367  | 36.3 | 496  | 39.9 | 0.87 | 0.70 | 1.09 |
| 34 |                                            |      |      |      |      |      |      |      |
| 35 | ≥15, 000 (≥4000\$)                         | 158  | 15.6 | 167  | 13.4 | 1.12 | 0.84 | 1.47 |
| 36 |                                            |      |      |      |      |      |      |      |
| 37 | Maternal education                         |      |      |      |      |      |      |      |
| 38 |                                            |      |      |      |      |      |      |      |
| 39 | Illiterate                                 | 391  | 33.2 | 333  | 26.4 | 1.50 | 1.26 | 1.80 |
| 40 |                                            |      |      |      |      |      |      |      |
| 41 | Schooling up to high school                | 671  | 56.9 | 859  | 68.1 | Ref  | -    | -    |
| 42 |                                            |      |      |      |      |      |      |      |
| 43 | University                                 | 117  | 9.9  | 70   | 5.5  | 2.05 | 1.49 | 2.81 |
| 44 |                                            |      |      |      |      |      |      |      |
| 45 | Folic acid intake                          |      |      |      |      |      |      |      |
| 46 |                                            |      |      |      |      |      |      |      |
| 47 | Periconceptual                             | 109  | 9.2  | 128  | 10.1 | Ref  | -    | -    |
| 48 |                                            |      |      |      |      |      |      |      |
| 49 | Improper use <sup>§</sup>                  | 1070 | 90.8 | 1134 | 89.9 | 1.04 | 0.79 | 1.36 |
| 50 |                                            |      |      |      |      |      |      |      |
| 51 |                                            |      |      |      |      |      |      |      |
| 52 |                                            |      |      |      |      |      |      |      |
| 53 |                                            |      |      |      |      |      |      |      |
| 54 |                                            |      |      |      |      |      |      |      |
| 55 |                                            |      |      |      |      |      |      |      |
| 56 |                                            |      |      |      |      |      |      |      |
| 57 |                                            |      |      |      |      |      |      |      |
| 58 |                                            |      |      |      |      |      |      |      |
| 59 |                                            |      |      |      |      |      |      |      |
| 60 |                                            |      |      |      |      |      |      |      |

## Parental Smoking

|                               |     |      |     |      |      |      |      |
|-------------------------------|-----|------|-----|------|------|------|------|
| Neither parent smoked         | 837 | 71.0 | 888 | 70.4 | Ref  | -    | -    |
| One or both parents<br>smoked | 342 | 29.0 | 374 | 29.6 | 0.97 | 0.82 | 1.16 |

## Radiation exposure in pregnancy

|                                    |      |      |      |      |      |      |      |
|------------------------------------|------|------|------|------|------|------|------|
| None                               | 1161 | 98.5 | 1254 | 99.4 | Ref  | -    | -    |
| Radiation exposure in<br>pregnancy | 18   | 1.5  | 8    | 0.6  | 2.43 | 1.05 | 5.61 |

## Diabetes mellitus (DM)

|                                            |     |      |      |      |      |      |      |
|--------------------------------------------|-----|------|------|------|------|------|------|
| No DM                                      | 956 | 81.1 | 1062 | 84.2 | Ref  | -    | -    |
| DM on insulin (all, overt &<br>gestational | 86  | 7.3  | 41   | 3.2  | 2.34 | 1.60 | 3.43 |
| Gestational DM on diet only                | 137 | 11.6 | 157  | 12.6 | 0.91 | 0.62 | 1.16 |

## Sibs of cases and controls (primiparous mothers excluded)

|                            |     |      |     |      |      |      |      |
|----------------------------|-----|------|-----|------|------|------|------|
| No affected sibling        | 757 | 78.6 | 932 | 94.2 | Ref- | -    | -    |
| Sibling with birth defects | 85  | 8.8  | 58  | 5.7  | 1.61 | 1.14 | 2.27 |

## Medication use in pregnancy

|            |     |      |     |      |      |      |      |
|------------|-----|------|-----|------|------|------|------|
| None       | 792 | 67.2 | 951 | 75.3 | -    | -    | -    |
| Thyroxin   | 102 | 8.7  | 106 | 8.4  | 1.03 | 0.78 | 1.37 |
| Insulin    | 86  | 7.3  | 40  | 3.2  | 2.34 | 1.59 | 3.45 |
| Methyldopa | 14  | 1.2  | 14  | 1.1  | 1.07 | 0.51 | 2.26 |

|    |                                                                                          |     |      |     |      |      |      |      |
|----|------------------------------------------------------------------------------------------|-----|------|-----|------|------|------|------|
| 1  |                                                                                          |     |      |     |      |      |      |      |
| 2  |                                                                                          |     |      |     |      |      |      |      |
| 3  | Maternal systemic illnesses                                                              |     |      |     |      |      |      |      |
| 4  |                                                                                          |     |      |     |      |      |      |      |
| 5  | None                                                                                     | 808 | 68.5 | 971 | 76.9 | Ref- | -    | -    |
| 6  |                                                                                          |     |      |     |      |      |      |      |
| 7  | Mothers with Hypothyroidism                                                              | 123 | 10.4 | 128 | 10.1 | 1.03 | 0.80 | 1.34 |
| 8  |                                                                                          |     |      |     |      |      |      |      |
| 9  | Mothers with Bronchial asthma                                                            | 106 | 9.0  | 97  | 7.7  | 1.19 | 0.89 | 1.58 |
| 10 |                                                                                          |     |      |     |      |      |      |      |
| 11 | Mothers with depression                                                                  | 12  | 1.0  | 6   | 0.5  | 2.15 | 0.81 | 5.75 |
| 12 |                                                                                          |     |      |     |      |      |      |      |
| 13 | Mothers with essential                                                                   | 23  | 2.0  | 15  | 1.2  | 1.65 | 0.86 | 3.19 |
| 14 | hypertension                                                                             |     |      |     |      |      |      |      |
| 15 |                                                                                          |     |      |     |      |      |      |      |
| 16 |                                                                                          |     |      |     |      |      |      |      |
| 17 |                                                                                          |     |      |     |      |      |      |      |
| 18 |                                                                                          |     |      |     |      |      |      |      |
| 19 |                                                                                          |     |      |     |      |      |      |      |
| 20 |                                                                                          |     |      |     |      |      |      |      |
| 21 |                                                                                          |     |      |     |      |      |      |      |
| 22 |                                                                                          |     |      |     |      |      |      |      |
| 23 |                                                                                          |     |      |     |      |      |      |      |
| 24 | Footnote:                                                                                |     |      |     |      |      |      |      |
| 25 |                                                                                          |     |      |     |      |      |      |      |
| 26 |                                                                                          |     |      |     |      |      |      |      |
| 27 | <sup>†</sup> Odds ratio adjusted for multiple potential confounders in multiple logistic |     |      |     |      |      |      |      |
| 28 | regression model.                                                                        |     |      |     |      |      |      |      |
| 29 |                                                                                          |     |      |     |      |      |      |      |
| 30 |                                                                                          |     |      |     |      |      |      |      |
| 31 | <sup>*</sup> BMI not available for 15 mothers                                            |     |      |     |      |      |      |      |
| 32 |                                                                                          |     |      |     |      |      |      |      |
| 33 | Some families declined reporting their income.                                           |     |      |     |      |      |      |      |
| 34 |                                                                                          |     |      |     |      |      |      |      |
| 35 |                                                                                          |     |      |     |      |      |      |      |
| 36 | <sup>§</sup> Improper-use includes FA taken post conception and 49 mothers (43 case      |     |      |     |      |      |      |      |
| 37 | mothers and 6 control mothers) who were not sure about their intake.                     |     |      |     |      |      |      |      |
| 38 |                                                                                          |     |      |     |      |      |      |      |
| 39 |                                                                                          |     |      |     |      |      |      |      |
| 40 |                                                                                          |     |      |     |      |      |      |      |
| 41 |                                                                                          |     |      |     |      |      |      |      |
| 42 |                                                                                          |     |      |     |      |      |      |      |
| 43 |                                                                                          |     |      |     |      |      |      |      |
| 44 |                                                                                          |     |      |     |      |      |      |      |
| 45 | <b>Figures legend:</b>                                                                   |     |      |     |      |      |      |      |
| 46 |                                                                                          |     |      |     |      |      |      |      |
| 47 |                                                                                          |     |      |     |      |      |      |      |
| 48 |                                                                                          |     |      |     |      |      |      |      |
| 49 | Legend: Figure _1 Catchment site and the study flow chart.                               |     |      |     |      |      |      |      |
| 50 |                                                                                          |     |      |     |      |      |      |      |
| 51 |                                                                                          |     |      |     |      |      |      |      |
| 52 | Legend: Figure _2 Study population and distribution of pregnancies and their             |     |      |     |      |      |      |      |
| 53 | outcomes.                                                                                |     |      |     |      |      |      |      |
| 54 |                                                                                          |     |      |     |      |      |      |      |
| 55 |                                                                                          |     |      |     |      |      |      |      |
| 56 |                                                                                          |     |      |     |      |      |      |      |
| 57 |                                                                                          |     |      |     |      |      |      |      |
| 58 |                                                                                          |     |      |     |      |      |      |      |
| 59 |                                                                                          |     |      |     |      |      |      |      |
| 60 |                                                                                          |     |      |     |      |      |      |      |

Footnote:

<sup>†</sup>Odds ratio adjusted for multiple potential confounders in multiple logistic regression model.

<sup>\*</sup>BMI not available for 15 mothers

Some families declined reporting their income.

<sup>§</sup>Improper-use includes FA taken post conception and 49 mothers (43 case mothers and 6 control mothers) who were not sure about their intake.

### Figures legend:

Legend: Figure \_1 Catchment site and the study flow chart.

Legend: Figure \_2 Study population and distribution of pregnancies and their outcomes.

1  
2  
3 Legend: Figure \_ 3 Frequency among control subjects of selected risk factors for  
4 birth defects.  
5  
6  
7  
8  
9  
10  
11  
12  
13  
14  
15  
16  
17  
18  
19  
20  
21  
22  
23  
24  
25  
26  
27  
28  
29  
30  
31  
32  
33  
34  
35  
36  
37  
38  
39  
40  
41  
42  
43  
44  
45  
46  
47  
48  
49  
50  
51  
52  
53  
54  
55  
56  
57  
58  
59  
60

For peer review only



Figure 1- Catchment site and the study flow chart.

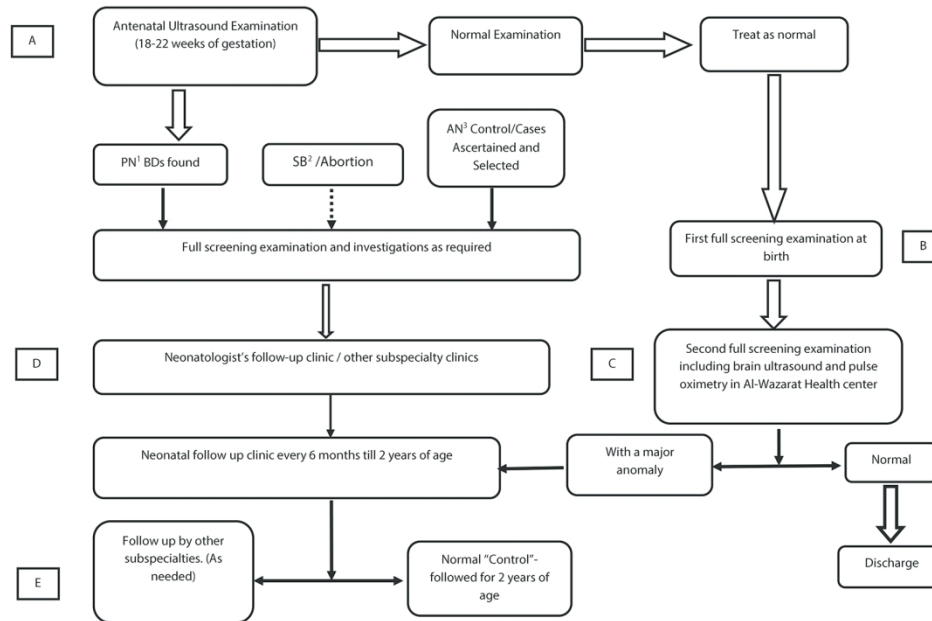

Legend: Case catchment areas (A to E). A: antenatal clinic, B: at birth, C: the "one-month clinic", D: geneticist "one-month clinic", and E: other areas. 1,2,3 are postnatal, stillbirth and antenatal respectively. BD, Birth defect

Legend: Figure \_1 Catchment site and the study flow chart.

150x120mm (300 x 300 DPI)

Figure 2. Study population and distribution of pregnancies and their outcomes.

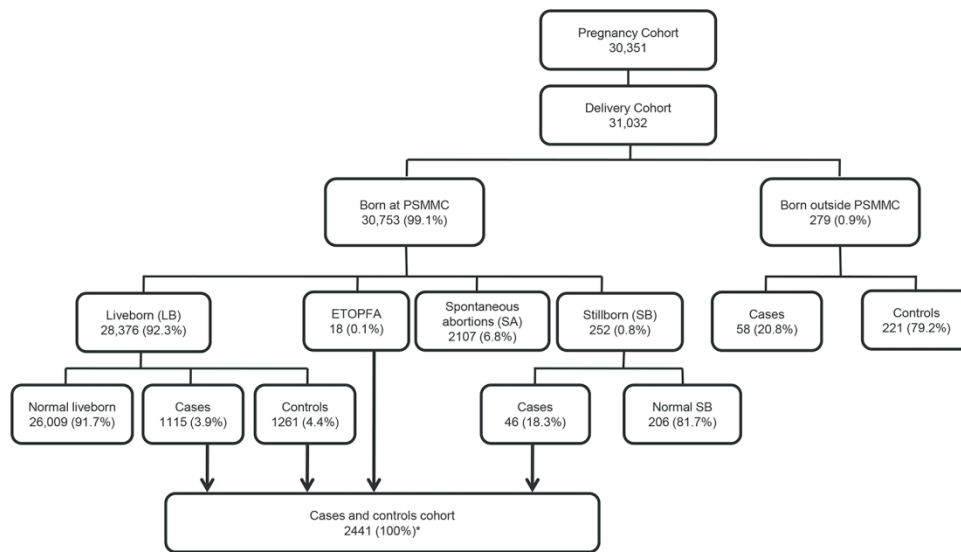

Legend:

PSMMC, Prince Sultan Military Medical City; Sp Ab, Spontaneous abortions; ETOPFA, Elective termination of pregnancy for fetal anomaly.

\*One control fetus was a Stillbirth.

Legend: Figure \_2 Study population and distribution of pregnancies and their outcomes.

150x112mm (300 x 300 DPI)

Figure 3. Frequency among control subjects of selected risk factors for birth defects.

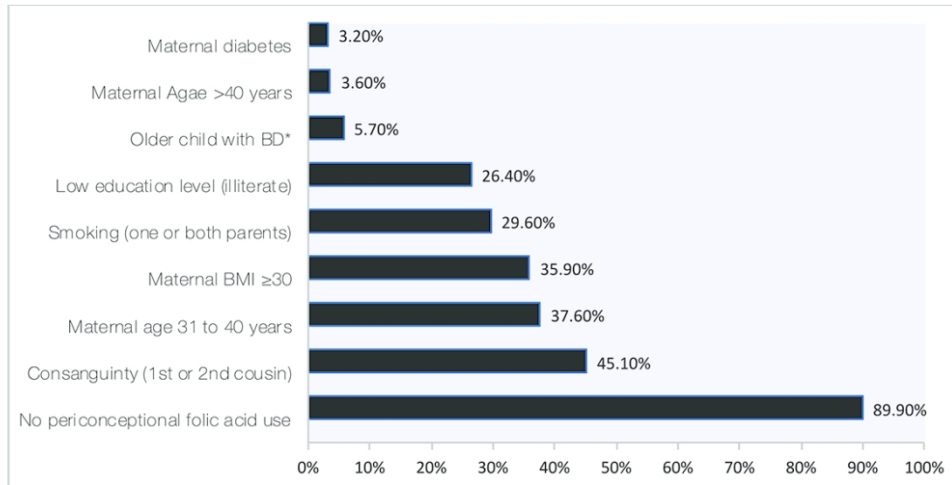

Legend:

BMI, pre-pregnancy maternal body mass index

BD, birth defect

\*Frequency of prior child with BD computed among non-primiparous women

Legend: Figure \_ 3 Frequency among control subjects of selected risk factors for birth defects.

99x79mm (300 x 300 DPI)

Supplement file

Appendix

---

Confidential

---

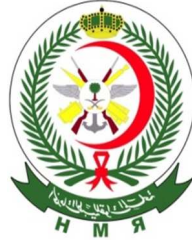

PSMMC

Booklet of

**“Pattern of Fetal Malformations in a Saudi Population”**

Study

Control

Local ID No.: \_\_\_\_\_ / Year 201

Mother’s Name:

---

Mother’s MRN:

---

Baby’s Name:

---

Baby’s MRN:

---

Date of Birth:

---

Contact No: Mobile (husband)

Mobile (wife)

Home

Confidential

Keep in a safe place

**Pattern of Malformations Study – PSMMC**

(Baby and mother)

Local ID No \_\_\_\_\_

D.O.B. (dd/mm/yy): \_\_\_\_/\_\_\_\_/\_\_\_\_ Year: 201\_\_

D. O. B./ Year Unknown Sex: Male  Female  indeterminate  Not known 

No. of babies delivered: Singleton 1  Twin 2  Triplet 3  Quadruplet 4   
 Quintuplet 5  Sextuplet 6   
 Not known 9

Specify twin type of birth, like or unlike sex, zygosity: \_\_\_\_\_

No. of malformed (in multiple set): No. \_\_\_\_ Not known 

Type of birth: Live Birth (LB).  Still Birth (SB)  Spontaneous Abortion   
 TOP  Not known

Civil registration status LB  SB  No CR  Not known Birth weight (g): \_\_\_\_\_ Confirmed Length of gestation (weeks): \_\_\_\_\_ Confirmed 

Survival beyond one week of age:

Yes  No  Alive at discharge <1 Week  Not known 

Date of death (dd/mm/yy): \_\_\_\_/\_\_\_\_/\_\_\_\_ Year: \_\_\_\_\_

D. O. B. Mother (dd/mm/yy): \_\_\_\_/\_\_\_\_/\_\_\_\_ Year: \_\_\_\_\_ Confirmed 

Age of mother at delivery: \_\_\_\_\_

**Pattern of Malformations Study – RMH**

(Baby and mother)

Local ID No \_\_\_\_\_

**Mother's residence code at conception:** Province \_\_\_\_\_ District \_\_\_\_\_

Mother's residence code at delivery: Province \_\_\_\_\_ District \_\_\_\_\_

**Total No. of previous pregnancies:** None  Number ( \_\_\_ )  Not known

**When discovered:**

At birth  Less than 1 wk  1-4 wk  1-12 m  >12 m  Prenatal diagnosis

At abortion (sp) or termination  Not known  Postnatal diagnosis, age not known

**Condition at discovery:** Alive  Dead  Not known

**Gestational age at discovery (wk):** \_\_\_\_\_

**First positive prenatal test:**

US at <14 wks  US at 14-21 wks  US at ≥ 22 wk  US GA unknown   
Serum/combined screening  CVS  Amniocentesis  Other tests positive

No positive test, all results negative

**Specify 'other' prenatal test:** \_\_\_\_\_

**Karyotype of infant/ fetus:**

Performed, result known  Performed, result unknown

Not performed  Probe test performed  Failed  Not known

**Specify karyotype:** \_\_\_\_\_

**Post mortem exam:**

Performed, result known  Performed, result unknown

Macerated fetus  Not known  Not performed

**First surgical procedure:**

Performed (or expected) in the first year of life

Performed (or expected) after the first year of life

Prenatal surgery  No surgery required

Too sever for surgery  Not known

1  
2  
3  
4  
5  
6  
7  
8  
9  
10  
11  
12  
13  
14  
15  
16  
17  
18  
19  
20  
21  
22  
23  
24  
25  
26  
27  
28  
29  
30  
31  
32  
33  
34  
35  
36  
37  
38  
39  
40  
41  
42  
43  
44  
45  
46  
47  
48  
49  
50  
51  
52  
53  
54  
55  
56  
57  
58  
59  
60

**Pattern of Malformations Study – PSMMC**  
(Prenatal Malformations)

Local ID No \_\_\_\_\_

|                        | Code | Text |
|------------------------|------|------|
| <b>Syndrome:</b>       |      |      |
| <b>Malformation 1:</b> |      |      |
| <b>Malformation 2:</b> |      |      |
| <b>Malformation 3:</b> |      |      |
| <b>Malformation 4:</b> |      |      |
| <b>Malformation 5:</b> |      |      |
| <b>Malformation 6:</b> |      |      |
| <b>Malformation 7:</b> |      |      |
| <b>Malformation 8:</b> |      |      |

1  
2  
3  
4  
5  
6  
7  
8  
9  
10  
11  
12  
13  
14  
15  
16  
17  
18  
19  
20  
21  
22  
23  
24  
25  
26  
27  
28  
29  
30  
31  
32  
33  
34  
35  
36  
37  
38  
39  
40  
41  
42  
43  
44  
45  
46  
47  
48  
49  
50  
51  
52  
53  
54  
55  
56  
57  
58  
59  
60

### Pattern of Malformations Study – RMH

(All Malformations)

Local ID No \_\_\_\_\_

|                        | Code | Text |
|------------------------|------|------|
| <b>Syndrome:</b>       |      |      |
| <b>Malformation 1:</b> |      |      |
| <b>Malformation 2:</b> |      |      |
| <b>Malformation 3:</b> |      |      |
| <b>Malformation 4:</b> |      |      |
| <b>Malformation 5:</b> |      |      |
| <b>Malformation 6:</b> |      |      |
| <b>Malformation 7:</b> |      |      |
| <b>Malformation 8:</b> |      |      |

McKusick code: \_\_\_\_\_

#### Aetiology:

Chromosome **C**  Familial **F**  Isolated **I**  Multiple **M**

New Dominant **ND**  Other Genomic **OG**  Syndrome **S**  Teratogens **T**  Inborn

Error of Metabolism **IEM**  Control **Co**

View anomaly subgroup(s):



**Pattern of Malformations Study – RMH**

Local ID No \_\_\_\_\_

**Assisted conception:** No  Induced ovulation only  Artificial insemination   
 In vitro fertilization  Gamete intrafollopian transfer   
 Intracytoplasmic sperm injection  Egg donation  Other   
 Not known

**Mother's occupation:** House wife  Teacher  Student  Other

**Maternal Systemic illnesses;**

None  EHT  Hypothyroidism  CHD   
 RHD  CRF  Asthma  SCA  SLE   
 IDA  Anxiety  Depression  Epilepsy   
 Other  (specify) \_\_\_\_\_

**Weight before pregnancy (Kg)** \_\_\_\_\_

**Current weight (Kg)** \_\_\_\_\_

**Mother's height (m)** \_\_\_\_\_

**Body Mass Index:** <18.5  18.5 – 24.9  25 – 29.9   
 30.0 – 34.9  35.0 – 39.9  ≥ 40.0

**True DM:** Yes  No

**Gestational DM on Diet (GDOD)**

**Gestational DM on Insulin (GDOI)**

**Diabetes screening:** GTT (result) 0 time: \_\_\_\_\_ 1 hour: \_\_\_\_\_ 2 hours: \_\_\_\_\_

Booking RBS: \_\_\_\_\_

**HbA1c** \_\_\_\_\_

**Infectious disease:**

Tuberculosis: Before pregnancy  During pregnancy  1<sup>st</sup> T  2<sup>nd</sup> T  3<sup>rd</sup> T

Rubella Before pregnancy  During pregnancy  1<sup>st</sup> T  2<sup>nd</sup> T  3<sup>rd</sup> T

CMV Before pregnancy  During pregnancy  1<sup>st</sup> T  2<sup>nd</sup> T  3<sup>rd</sup> T

Toxoplasmosis Before pregnancy  During pregnancy  1<sup>st</sup> T  2<sup>nd</sup> T  3<sup>rd</sup> T

Syphilis Before pregnancy  During pregnancy  1<sup>st</sup> T  2<sup>nd</sup> T  3<sup>rd</sup> T

UTI Before pregnancy  During pregnancy  1<sup>st</sup> T  2<sup>nd</sup> T  3<sup>rd</sup> T

Fever Before pregnancy  During pregnancy  1<sup>st</sup> T  2<sup>nd</sup> T  3<sup>rd</sup> T

FLU Before pregnancy  During pregnancy  1<sup>st</sup> T  2<sup>nd</sup> T  3<sup>rd</sup> T

Others Before pregnancy  During pregnancy  1<sup>st</sup> T  2<sup>nd</sup> T  3<sup>rd</sup> T

(Specify others) \_\_\_\_\_

**Previous surgical history:** Obstetrical/Gynaecological

Specify; \_\_\_\_\_

Non Obstetrical

Specify; \_\_\_\_\_

1  
2  
3  
4  
5  
6  
7  
8  
9  
10  
11  
12  
13  
14  
15  
16  
17  
18  
19  
20  
21  
22  
23  
24  
25  
26  
27  
28  
29  
30  
31  
32  
33  
34  
35  
36  
37  
38  
39  
40  
41  
42  
43  
44  
45  
46  
47  
48  
49  
50  
51  
52  
53  
54  
55  
56  
57  
58  
59  
60

## Pattern of Malformations Study – PSMMC

### Family history & sociodemographic

Local ID No \_\_\_\_\_

#### Folic acid supplementation:

At least 0.4 mg folic acid supplement taken regularly, starting periconceptionally

Folic acid supplement taken irregularly or starting post-conceptionally

No folic acid supplement taken or not recorded

#### ATC code

Text (**only** drugs taken in the 1<sup>st</sup> trimester of pregnancy)

|          |  |  |
|----------|--|--|
| Drugs 1: |  |  |
| Drugs 2: |  |  |
| Drugs 3: |  |  |
| Drugs 4: |  |  |
| Drugs 5: |  |  |

**Consanguinity:** Not related or relationship more distant than second cousin

Relationship of second cousin or closer  Not known

#### Specific information on consanguinity:

\_\_\_\_\_

**Sibs with anomalies:** Same  Other  Same and other  No  Not known

**Previous sibs notified to the Saudi Malformations Registry:** Yes  No  Not known

**Local ID of previous sibs notified to the SMR (1):** \_\_\_\_\_

**Local ID of previous sibs notified to the SMR (2):** \_\_\_\_\_

**Local ID of previous sibs notified to the SMR (3):** \_\_\_\_\_

**Mother's family with anomalies:** Same  Other  Same and other  No

Not known  Specify \_\_\_\_\_

1  
2  
3 **Father's family with anomalies:** Same  Other  Same and other  No

4  
5 Not known  Specify \_\_\_\_\_

6  
7 **Maternal education:** Illiterate  Elementary and lower secondary

8  
9 Upper secondary  Tertiary  Not known

10  
11 **Family monthly income (SR):** \_\_\_\_\_

12  
13 **(husband or combined husband and wife income)**

14  
15 **Nationality:** Saudi  None Saudi  Only father Saudi  Only mother Saudi

16  
17 **General additional comments:**

18  
19  
20 \_\_\_\_\_

21  
22 \_\_\_\_\_

1  
2  
3  
4  
5  
6  
7  
8 **Pattern of Malformations Study – PSMMC**

9  
10 Local Vars. (1)

11  
12 Local ID No \_\_\_\_\_

13  
14 **Place of birth:** \_\_\_\_\_

15  
16 **Birth order (in multiple set),** (please write as 1<sup>st</sup>, 2<sup>nd</sup>, 3<sup>rd</sup> and so on): \_\_\_\_\_

17  
18 **Date of discovery (dd/mm/yy):** \_\_\_\_/\_\_\_\_/\_\_\_\_ **Year:** \_\_\_\_\_

19  
20 **Amniocentesis:** Performed result positive  Performed result not known

21  
22 Not performed  Performed result negative  Failed  Not known

23  
24 **Ultrasound:** Performed result positive  Performed result not known

25  
26 Not performed  Performed result negative  Failed  Not known

27  
28 **Chorionic villous sampling:** \_\_\_\_\_

29  
30 **Other techniques:**

31  
32 Performed result positive  Performed result not known  Not performed

33  
34 Performed result negative  Failed  Not known

35  
36  
37  
38 **Specify other technique for prenatal diagnosis:** \_\_\_\_\_

39  
40 (Cordocentesis,..etc)

41  
42 **No. of previous spontaneous abortions:** None  1  2  3  4

43  
44 5  6  7  8+  Not known

45  
46 **No. of previous TOP:** None  1  2  3  4  5

47  
48 6  7  8+  Not known

49  
50 **No. of previous live births:** please write the exact No (1-20) \_\_\_\_\_ Unknown

51  
52 **No. of previous stillbirths:** None  1  2  3  4

53  
54 5  6  7  8+  Not known

55  
56 **Mode of transmission:** Familial  De novo  Not known

**Habitual exposures:** Smoking F179  Oude F159   
 Other (specify) \_\_\_\_\_

**Unusual exposures:** X-ray during pregnancy (any)  Nuclear medicine during pregnancy   
 (Radiation & chemical)

**Date of birth of father:** \_\_\_\_/\_\_\_\_/\_\_\_\_ **Year:** \_\_\_\_\_ **Age of father:** \_\_\_\_\_

**Occupation of father:** Soldier  Officer  Civilian

### Pattern of Malformations Study – RMH

Local Vars. (2)

Local ID No \_\_\_\_\_

**Date of last LMP:** \_\_\_\_/\_\_\_\_/\_\_\_\_

**Certainty of LMP:** Certain  Uncertain  No LMP  Not known

**Labor:** Spontaneous  Induced  No labor

**Delivery:** Spontaneous  EMLSCS  ELSCS  ABD   
 Instrumental

#### Sources of information 1:

Notes in routine scan  Birth notification or notification of malformation at birth

Hospital case notes  Death or stillbirth certificate  Prenatal diagnosis

Lab. report (cytogenetic ... etc)  Postmortem exam  Other  Not known

**Sources of information 2:** please insert as in one \_\_\_\_\_

**Sources of information 3:** please insert as in one \_\_\_\_\_

**Sources of information 4:** please insert as in one \_\_\_\_\_

**Sources of information 5:** please insert as in one \_\_\_\_\_

**Racial information** Mother, Tribe code \_\_\_\_\_ Father, Tribe code \_\_\_\_\_

Same tribe  Different tribe

Otaibi 1, Mutairi 2, Shuhri 3, Asiri 4, Shamrani 5, Onazi 6, Shahrani 7, Zaharani 8, Harbi 9, Qahatni 10, Ghamdi 11, Shamari 12, Asmari 13, Ahmari 14, Amri 15, Dawsari 16, Harthi 17, Subaie 18, Ajman 19, Not known (99)

Other 20, specify: \_\_\_\_\_

**Chronic illness of father (including drug abuse):** \_\_\_\_\_

**Confirmation of diagnosis:**

Follow up needed for further confirmation  Confirmed at <6 months   
Confirmed at 6-12 m  Confirmed at 12-18 m  Confirmed at 18-24 m   
Not confirmed, lost for follow up

**Source:** Booked  Un booked  Referred

STROBE Statement—checklist of items that should be included in reports of observational studies

|                           | <b>Item No.</b> | <b>Recommendation</b>                                                                                                           | <b>Page No.</b> | <b>Relevant text from manuscript</b>                                                                                                                                                                                                                                                                                                                                                                                                                                                                                   |
|---------------------------|-----------------|---------------------------------------------------------------------------------------------------------------------------------|-----------------|------------------------------------------------------------------------------------------------------------------------------------------------------------------------------------------------------------------------------------------------------------------------------------------------------------------------------------------------------------------------------------------------------------------------------------------------------------------------------------------------------------------------|
| <b>Title and abstract</b> | 1               | (a) Indicate the study's design with a commonly used term in the title or the abstract                                          | 1               | Observational, prospective cohort design with a nested case-control study                                                                                                                                                                                                                                                                                                                                                                                                                                              |
|                           |                 | (b) Provide in the abstract an informative and balanced summary of what was done and what was found                             | 2               | Abstract<br>Of the 28 646 eligible pregnancy outcomes, 1179 were diagnosed with a BD, for an overall prevalence of 412/10000 total births, or 1 in 24 births.                                                                                                                                                                                                                                                                                                                                                          |
| <b>Introduction</b>       |                 |                                                                                                                                 |                 |                                                                                                                                                                                                                                                                                                                                                                                                                                                                                                                        |
| Background/rationale      | 2               | Explain the scientific background and rationale for the investigation being reported                                            | 4               | Birth defects (BD) are increasingly recognized as a global health priority because of their lifelong impact on health and survival. <sup>1,2</sup><br>BD affect approximately an estimated 1 in 33 newborns, contribute each year to 300,000 deaths in the first month of life, and are associated with 3.2 million birth-related disabilities. <sup>3</sup> Accordingly, the World Health Assembly has emphasized the urgent need for action to help prevent, diagnose, and provide timely intervention. <sup>1</sup> |
| Objectives                | 3               | State specific objectives, including any prespecified hypotheses                                                                | 4               | In this study, we implemented an integrated approach to generate these data in well-defined cohort of women, tracked from mid-gestation through the second year of life of their children, to assess concurrently the burden of potentially modifiable risk factors, the occurrence of BD, and survival of affected children, as a basis for better prevention and care. <sup>4</sup>                                                                                                                                  |
| <b>Methods</b>            |                 |                                                                                                                                 |                 |                                                                                                                                                                                                                                                                                                                                                                                                                                                                                                                        |
| Study design              | 4               | Present key elements of study design early in the paper                                                                         | 5               | Observational, prospective cohort design with a nested case-control study.                                                                                                                                                                                                                                                                                                                                                                                                                                             |
| Setting                   | 5               | Describe the setting, locations, and relevant dates, including periods of recruitment, exposure, follow-up, and data collection | 5               | The Prince Sultan Military Medical City (PSMMC) is a tertiary teaching institution with 1250 beds and                                                                                                                                                                                                                                                                                                                                                                                                                  |



1  
2  
3  
4  
5  
6  
7  
8  
9  
10  
11  
12  
13  
14  
15  
16  
17  
18  
19  
20  
21  
22  
23  
24  
25  
26  
27  
28  
29  
30  
31  
32  
33  
34  
35  
36  
37  
38  
39  
40  
41  
42  
43  
44  
45  
46  
47

|                              |    |                                                                                                                                                                                            |   |         |                                                                                                                                                                                                                                                                                                                                                                                                                                                                              |
|------------------------------|----|--------------------------------------------------------------------------------------------------------------------------------------------------------------------------------------------|---|---------|------------------------------------------------------------------------------------------------------------------------------------------------------------------------------------------------------------------------------------------------------------------------------------------------------------------------------------------------------------------------------------------------------------------------------------------------------------------------------|
|                              |    |                                                                                                                                                                                            |   |         | approximately 10,000 annual deliveries. PSMMC primarily serves Saudi army personnel and their families and is a referral center for the other 16 military hospitals in the Kingdom of Saudi Arabia.                                                                                                                                                                                                                                                                          |
|                              |    |                                                                                                                                                                                            |   | *15 -24 | Study period 1 July 2010 through 30 June 2013.<br>*Figures and tables                                                                                                                                                                                                                                                                                                                                                                                                        |
| Participants                 | 6  | (a) <i>Cohort study</i> —Give the eligibility criteria, and the sources and methods of selection of participants. Describe methods of follow-up                                            | 5 |         | All pregnant Saudi women who are eligible for their antenatal care at PSMMC were included and their pregnancy outcome.                                                                                                                                                                                                                                                                                                                                                       |
|                              |    | <i>Case-control study</i> —Give the eligibility criteria, and the sources and methods of case ascertainment and control selection. Give the rationale for the choice of cases and controls | 7 |         | Mothers who delivered elsewhere were not included even if they have their antenatal care at PSMMC. All mothers who care pregnant with an affected foetus (birth defect) are include. For controls a random sample of women in the cohort with a normal USS. The random sample was generated daily by taking the morning list of scheduled USS and using a random number generator ( <a href="http://www.random.org">http://www.random.org</a> ) to select potential controls |
|                              |    | <i>Cross-sectional study</i> —Give the eligibility criteria, and the sources and methods of selection of participants                                                                      |   |         |                                                                                                                                                                                                                                                                                                                                                                                                                                                                              |
|                              |    |                                                                                                                                                                                            |   |         | n/a                                                                                                                                                                                                                                                                                                                                                                                                                                                                          |
|                              |    | (b) <i>Cohort study</i> —For matched studies, give matching criteria and number of exposed and unexposed                                                                                   |   |         |                                                                                                                                                                                                                                                                                                                                                                                                                                                                              |
|                              |    | <i>Case-control study</i> —For matched studies, give matching criteria and the number of controls per case                                                                                 |   |         |                                                                                                                                                                                                                                                                                                                                                                                                                                                                              |
| Variables                    | 7  | Clearly define all outcomes, exposures, predictors, potential confounders, and effect modifiers. Give diagnostic criteria, if applicable                                                   | 8 |         | Evaluations for specific BD, Nested Case-Control Study, Follow up, Case review, coding, classification.                                                                                                                                                                                                                                                                                                                                                                      |
| Data sources/<br>measurement | 8* | For each variable of interest, give sources of data and details of methods of assessment (measurement). Describe comparability of assessment methods if there is more than one group       |   |         | n/a                                                                                                                                                                                                                                                                                                                                                                                                                                                                          |
| Bias                         | 9  | Describe any efforts to address potential sources of bias                                                                                                                                  | 5 |         | Pregnancies referred from other hospitals because of a                                                                                                                                                                                                                                                                                                                                                                                                                       |

1  
2  
3  
4  
5  
6  
7  
8  
9  
10  
11  
12  
13  
14  
15  
16  
17  
18  
19  
20  
21  
22  
23  
24  
25  
26  
27  
28  
29  
30  
31  
32  
33  
34  
35  
36  
37  
38  
39  
40  
41  
42  
43  
44  
45  
46  
47

---

|   |    |                                           |   |                                                                                                                          |
|---|----|-------------------------------------------|---|--------------------------------------------------------------------------------------------------------------------------|
|   |    |                                           |   | diagnosis of a fetal anomaly, and babies with BD delivered elsewhere and referred to PSMMC for evaluation and management |
| A | 10 | Explain how the study size was arrived at | 5 | All mother delivered at PSMMC during the study period were included                                                      |

---

Continued on next page

For peer review only

1  
2  
3  
4  
5  
6  
7  
8  
9  
10  
11  
12  
13  
14  
15  
16  
17  
18  
19  
20  
21  
22  
23  
24  
25  
26  
27  
28  
29  
30  
31  
32  
33  
34  
35  
36  
37  
38  
39  
40  
41  
42  
43  
44  
45  
46  
47

|                        |     |                                                                                                                                                                                                                                                                                                           |      |                                                                                                                                                                                                                                                                                                                                                |
|------------------------|-----|-----------------------------------------------------------------------------------------------------------------------------------------------------------------------------------------------------------------------------------------------------------------------------------------------------------|------|------------------------------------------------------------------------------------------------------------------------------------------------------------------------------------------------------------------------------------------------------------------------------------------------------------------------------------------------|
| Quantitative variables | 11  | Explain how quantitative variables were handled in the analyses.<br>If applicable, describe which groupings were chosen and why                                                                                                                                                                           | 9    | Chi-square or Fisher's exact tests.                                                                                                                                                                                                                                                                                                            |
| Statistical methods    | 12  | (a) Describe all statistical methods, including those used to control for confounding                                                                                                                                                                                                                     | 9    | Odd ratios for BD were computed first via univariate logistic regression, then with a multiple logistic model. The latter was developed by first including uncorrelated significant factors ( $p < 0.05$ ) from the univariate analysis, then reducing the number of variables by stepwise backward elimination for a more parsimonious model. |
|                        |     | (b) Describe any methods used to examine subgroups and interactions                                                                                                                                                                                                                                       |      | n/a                                                                                                                                                                                                                                                                                                                                            |
|                        |     | (c) Explain how missing data were addressed                                                                                                                                                                                                                                                               |      |                                                                                                                                                                                                                                                                                                                                                |
|                        |     | (d) <i>Cohort study</i> —If applicable, explain how loss to follow-up was addressed<br><i>Case-control study</i> —If applicable, explain how matching of cases and controls was addressed<br><i>Cross-sectional study</i> —If applicable, describe analytical methods taking account of sampling strategy | 7    | n/a<br>randomization                                                                                                                                                                                                                                                                                                                           |
|                        |     | (e) Describe any sensitivity analyses                                                                                                                                                                                                                                                                     |      | n/a                                                                                                                                                                                                                                                                                                                                            |
| <b>Results</b>         |     |                                                                                                                                                                                                                                                                                                           |      |                                                                                                                                                                                                                                                                                                                                                |
| Participants           | 13* | (a) Report numbers of individuals at each stage of study—eg numbers potentially eligible, examined for eligibility, confirmed eligible, included in the study, completing follow-up, and analysed                                                                                                         | 9-12 | Figure 2                                                                                                                                                                                                                                                                                                                                       |
|                        |     | (b) Give reasons for non-participation at each stage                                                                                                                                                                                                                                                      |      | n/a                                                                                                                                                                                                                                                                                                                                            |
|                        |     | (c) Consider use of a flow diagram                                                                                                                                                                                                                                                                        |      |                                                                                                                                                                                                                                                                                                                                                |
| Descriptive data       | 14* | (a) Give characteristics of study participants (eg demographic, clinical, social) and information on exposures and potential confounders                                                                                                                                                                  | 23   | Tables 3                                                                                                                                                                                                                                                                                                                                       |
|                        |     | (b) Indicate number of participants with missing data for each variable of interest                                                                                                                                                                                                                       |      |                                                                                                                                                                                                                                                                                                                                                |
|                        |     | (c) <i>Cohort study</i> —Summarise follow-up time (eg, average and total amount)                                                                                                                                                                                                                          | 8    | 2 – 5 years. Follow up. Case-infants (with BD) and control-infants were examined in the dedicated study clinic at 1, 6, 12, 18 and 24 months of age                                                                                                                                                                                            |
| Outcome data           | 15* | <i>Cohort study</i> —Report numbers of outcome events or summary measures over time                                                                                                                                                                                                                       |      |                                                                                                                                                                                                                                                                                                                                                |
|                        |     | <i>Case-control study</i> —Report numbers in each exposure category, or summary measures of exposure                                                                                                                                                                                                      | 9    | 1179 as cases and 1262 as controls                                                                                                                                                                                                                                                                                                             |

1  
2  
3  
4  
5  
6  
7  
8  
9  
10  
11  
12  
13  
14  
15  
16  
17  
18  
19  
20  
21  
22  
23  
24  
25  
26  
27  
28  
29  
30  
31  
32  
33  
34  
35  
36  
37  
38  
39  
40  
41  
42  
43  
44  
45  
46  
47

---

*Cross-sectional study*—Report numbers of outcome events or summary measures

---

|              |    |                                                                                                                                                                                                              |         |                                                                                                                                                                                                                                                                                                                                                                                                                                                                                                                                                           |
|--------------|----|--------------------------------------------------------------------------------------------------------------------------------------------------------------------------------------------------------------|---------|-----------------------------------------------------------------------------------------------------------------------------------------------------------------------------------------------------------------------------------------------------------------------------------------------------------------------------------------------------------------------------------------------------------------------------------------------------------------------------------------------------------------------------------------------------------|
| Main results | 16 | (a) Give unadjusted estimates and, if applicable, confounder-adjusted estimates and their precision (eg, 95% confidence interval). Make clear which confounders were adjusted for and why they were included | 5,15-21 | Of the 28 646 eligible pregnancy outcomes, 1179 were diagnosed with a BD, for an overall prevalence of 412/10000 total births, or 1 in 24 births. Of these 1179 cases, 38 (3.2%) were stillbirths and 18 (1.5%) were electively terminated because of lethal malformations (13 with anencephaly, 3 with severe hydrops fetalis and cystic hygroma, 1 with Meckel-Gruber syndrome and 1 with bilateral renal agenesis). The antenatal detection rate among women who has had antenatal ultrasound screening examination was 70.6%(561/795), tables b 1,2,3 |
|              |    | (b) Report category boundaries when continuous variables were categorized                                                                                                                                    |         |                                                                                                                                                                                                                                                                                                                                                                                                                                                                                                                                                           |
|              |    | (c) If relevant, consider translating estimates of relative risk into absolute risk for a meaningful time period                                                                                             |         |                                                                                                                                                                                                                                                                                                                                                                                                                                                                                                                                                           |

---

Continued on next page

|                          |    |                                                                                                                                                                            |    |                                                                                                                                                                                                                                                                                                                                                                                                                                                                                                                                                                                |
|--------------------------|----|----------------------------------------------------------------------------------------------------------------------------------------------------------------------------|----|--------------------------------------------------------------------------------------------------------------------------------------------------------------------------------------------------------------------------------------------------------------------------------------------------------------------------------------------------------------------------------------------------------------------------------------------------------------------------------------------------------------------------------------------------------------------------------|
| Other analyses           | 17 | Report other analyses done—eg analyses of subgroups and interactions, and sensitivity analyses                                                                             |    | n/a                                                                                                                                                                                                                                                                                                                                                                                                                                                                                                                                                                            |
| <b>Discussion</b>        |    |                                                                                                                                                                            |    |                                                                                                                                                                                                                                                                                                                                                                                                                                                                                                                                                                                |
| Key results              | 18 | Summarise key results with reference to study objectives                                                                                                                   | 1  | In this cohort of women, the burden of potentially modifiable risk factors included high rates of diabetes (7.3%), maternal age >40 years (7.0%), consanguinity (54.5%), and lack of periconceptional folic acid use (90.8%). The birth prevalence of BD was 41.2/1,000 births (1179 cases / 28646 live births and stillbirths), driven mainly by congenital heart disease (14.8 per 1000), renal malformations (11.3), neural tube defects (1.9), and chromosomal anomalies (2.7). Mortality for live births with BD at 1 and 2 years of age was 14% and 15.8%, respectively. |
| Limitations              | 19 | Discuss limitations of the study, taking into account sources of potential bias or imprecision. Discuss both direction and magnitude of any potential bias                 | 13 | Single centre study, Army personnel household only                                                                                                                                                                                                                                                                                                                                                                                                                                                                                                                             |
| Interpretation           | 20 | Give a cautious overall interpretation of results considering objectives, limitations, multiplicity of analyses, results from similar studies, and other relevant evidence |    | High prevalence of birth defects, multiple modifiable risk factors.                                                                                                                                                                                                                                                                                                                                                                                                                                                                                                            |
| Generalisability         | 21 | Discuss the generalisability (external validity) of the study results                                                                                                      |    |                                                                                                                                                                                                                                                                                                                                                                                                                                                                                                                                                                                |
| <b>Other information</b> |    |                                                                                                                                                                            |    |                                                                                                                                                                                                                                                                                                                                                                                                                                                                                                                                                                                |
| Funding                  | 22 | Give the source of funding and the role of the funders for the present study and, if applicable, for the original study on which the present article is based              | 3  | This project was supported by King Abdul-Aziz City for Science and Technology (KACST) through the National Science, Technology and Innovation Plan (NSTIP). Project No: 09-MED748-21. The funder has no role in this study.                                                                                                                                                                                                                                                                                                                                                    |

\*Give information separately for cases and controls in case-control studies and, if applicable, for exposed and unexposed groups in cohort and cross-sectional studies.

**Note:** An Explanation and Elaboration article discusses each checklist item and gives methodological background and published examples of transparent reporting. The STROBE checklist is best used in conjunction with this article (freely available on the Web sites of PLoS Medicine at <http://www.plosmedicine.org/>, Annals of Internal Medicine at <http://www.annals.org/>, and Epidemiology at <http://www.epidem.com/>). Information on the STROBE Initiative is available at [www.strobe-statement.org](http://www.strobe-statement.org).

# BMJ Open

## Congenital anomalies and associated risk factors in a Saudi population: a cohort study from pregnancy to age 2 years

|                                 |                                                                                                                                                                                                                                                                                                                                                                                                                                                       |
|---------------------------------|-------------------------------------------------------------------------------------------------------------------------------------------------------------------------------------------------------------------------------------------------------------------------------------------------------------------------------------------------------------------------------------------------------------------------------------------------------|
| Journal:                        | <i>BMJ Open</i>                                                                                                                                                                                                                                                                                                                                                                                                                                       |
| Manuscript ID                   | bmjopen-2018-026351.R1                                                                                                                                                                                                                                                                                                                                                                                                                                |
| Article Type:                   | Research                                                                                                                                                                                                                                                                                                                                                                                                                                              |
| Date Submitted by the Author:   | 02-Apr-2019                                                                                                                                                                                                                                                                                                                                                                                                                                           |
| Complete List of Authors:       | Kurdi, Ahmed; Prince Sultan Military Medical City, Majeed-Saidan, Muhammad Ali; Prince Sultan Military Medical City, Paediatrics<br>Al Rakaf, Maha; Prince Sultan Military Medical City, Obstetrics & Gynecology<br>AlHashem, Amal; Prince Sultan Military Medical City<br>Botto, Lorenzo; University of Utah, Pediatrics<br>Baaqeel, Hassan; King Saud bin Abdulaziz University for Health Sciences, College of Medicine<br>Ammari, Amer; Pediatrics |
| <b>Primary Subject Heading</b>: | Epidemiology                                                                                                                                                                                                                                                                                                                                                                                                                                          |
| Secondary Subject Heading:      | Obstetrics and gynaecology, Paediatrics                                                                                                                                                                                                                                                                                                                                                                                                               |
| Keywords:                       | Prevalence, Risk factors, Prevention, Outcome, Congenital anomaly                                                                                                                                                                                                                                                                                                                                                                                     |
|                                 |                                                                                                                                                                                                                                                                                                                                                                                                                                                       |

SCHOLARONE™  
Manuscripts

1  
2  
3  
4 **Congenital anomalies and associated risk factors in a Saudi population:**  
5  
6 **a cohort study from pregnancy to age 2 years**  
7  
8  
9

10 Ahmed M Kurdi<sup>1</sup>, Muhammad A Majeed-Saidan<sup>2</sup>, Maha S Al Rakaf<sup>1</sup>,  
11 Amal M AlHashem<sup>2</sup>, Lorenzo D Botto<sup>3</sup>, Hassan S Baaqeel<sup>4</sup>, Amer N  
12 Ammari<sup>2</sup>.  
13  
14  
15  
16

17  
18  
19  
20 <sup>1</sup> Division of Maternal and Foetal Medicine, Department of Obstetrics  
21 and Gynaecology, Prince Sultan Military Medical City (PSMMC), P.O.  
22 Box 7897, Riyadh, 11159, Saudi Arabia.  
23  
24  
25

26  
27  
28  
29 <sup>2</sup> Department of Paediatric, Division of neonatal medicine, PSMMC.  
30  
31

32  
33  
34 <sup>2</sup> Department of Paediatric, Division of medical genetics, PSMMC  
35  
36  
37

38  
39 <sup>3</sup> Department of Paediatric, Division of medical genetics, 295 Chipeta  
40 way, Suite 25010, University of Utah school of medicine, Salt Lake City,  
41 UT, USA,  
42  
43  
44

45  
46  
47  
48 <sup>4</sup> Department of Obstetrics and Gynaecology, King Saud Bin AbdulAziz  
49 university for health sciences, Jeddah, Saudi Arabia,  
50  
51  
52

53  
54  
55 **Running title:** Congenital anomalies and Risk Factors in a Saudi  
56 population  
57  
58  
59  
60

1  
2  
3  
4 **Corresponding author:**  
5

6 **Dr. Ahmed M. Kurdi, MD, German Board, DFM**  
7

8 Consultant Maternal and Foetal Medicine  
9

10 Avenue Medical Center  
11

12 Kingdom of Saudi Arabia  
13

14 Telephone: work +966-112000099 Ext. 158  
15

16 Mobile: +966505451701  
17

18 Fax: 0096611-4500185  
19

20 Email: [ahmedkurdi1950@gmail.com](mailto:ahmedkurdi1950@gmail.com)  
21  
22  
23  
24  
25  
26  
27  
28  
29  
30

31 **Abstract**  
32  
33  
34  
35

36 **Objective:** To assess the three key issues for CAs prevention and care,  
37 namely, CA prevalence, risk factor prevalence, and survival, in a  
38 longitudinal cohort in Riyadh, Saudi Arabia.  
39  
40

41 **Setting:** Tertiary care centre, Riyadh, Saudi Arabia.  
42

43 **Participants:** Saudi women enrolled during pregnancy over three years  
44 and their 28,646 eligible pregnancy outcomes (births, stillbirths and  
45 elective terminations of pregnancy for foetal anomalies [ETOPFAs]). The  
46 nested case-control study evaluated the CA risk factor profile of the  
47 underlying cohort. All CA cases (1,179) and unaffected controls (1,262)  
48 were followed through age 2 years. Referred mothers because of foetal  
49 anomaly and mothers who delivered outside the study centre and their  
50 pregnancy outcome were excluded.  
51  
52  
53  
54  
55  
56  
57  
58  
59  
60



1  
2  
3  
4 **Primary outcome measures:** Prevalence and pattern of major CAs,  
5  
6 Frequency of CA-related risk factors, and survival through age 2 years.

7 **Results:** The birth prevalence of CAs was 412/10,000 births (95% CI  
8 388.6 to 434.9), driven mainly by congenital heart disease (148 per  
9 10,000) (95% CI 134 to 162), renal malformations (113, 95% CI 110 to  
10 125), neural tube defects (19, 95% CI 25.3 to 38.3), and chromosomal  
11 anomalies (27, 95% CI 21 to 33). In this study, the burden of potentially  
12 modifiable risk factors included high rates of diabetes (7.3%, OR 1.98,  
13 95% CI 1.04 to 2.12), maternal age >40 years (7.0%, OR 2.1, 95% CI  
14 1.35 to 3.3), consanguinity (54.5%, OR 1.5, 95% CI 1.28 to 1.81). The  
15 mortality for live births with CAs at 2 years of age was 15.8%.

16 **Conclusions:** This study documented specific opportunities to improve  
17 primary prevention and care. Specifically, folic acid fortification (the  
18 neural tube defect prevalence was >3 times that theoretically achievable  
19 by optimal fortification), preconception diabetes screening and  
20 consanguinity-related counselling could have significant and broad  
21 health benefits in this cohort and arguably in the larger Saudi population.  
22  
23  
24  
25  
26  
27  
28  
29  
30  
31  
32  
33  
34  
35  
36  
37  
38  
39  
40  
41  
42  
43

#### 44 **Strengths and limitations of this study:**

- 45 • Babies with CAs are diagnosed prospectively, prenatally, and  
46 postnatally and followed up to 2 years of age.
  - 47 • Involvement of multidisciplinary teams in establishing the final  
48 diagnosis.
  - 49 • Inclusion of elective termination of pregnancies with lethal CAs and  
50 stillbirths.
- 51  
52  
53  
54  
55  
56  
57  
58  
59  
60

- Single-centre study. The pregnancy cohort was mainly from families of Saudi army personnel dependents, which could be a limiting factor.

**The original protocol of the study:** Supplementary file.

**Funding statement:** This project was supported by a generous grant from King Abdul-Aziz City for Science and Technology (KACST) through the National Science, Technology and Innovation Plan (NSTIP). Project No: 09-MED748-21.

**Disclaimer:** The funding institution had no role in the study design, data collection, analysis, interpretation of data, the writing of the various reports or the decision for submission for publication. All authors have full independence from the funder, have full access to the data in the study and take full responsibility for the integrity of the data and the accuracy of the analysis.

**Competing interests statement:**

All authors have completed the ICMJE uniform disclosure from [www.icmje.org-coi\\_disclosure.pdf](http://www.icmje.org-coi_disclosure.pdf) and declare no support from any organization for the submitted research article; no financial relationship with any organization that might have an interest in the submitted work

1  
2  
3  
4 in the previous three years; and no other relationships or activities that  
5  
6 could appear to have influenced the submitted work.  
7  
8  
9

10 **Key words:** Congenital anomalies, Prevalence, Risk factors, Prevention,  
11  
12 and Outcome  
13  
14  
15  
16  
17  
18  
19  
20  
21  
22  
23  
24  
25  
26

27 **Congenital anomalies and associated risk factors in a Saudi population:**  
28  
29 **a cohort study from pregnancy to age 2 years**  
30  
31  
32  
33

34 **Introduction**

35  
36 Because of their lifelong impact on health and survival, congenital  
37 anomalies (CAs) are increasingly recognized as a global health priority.<sup>1</sup>  
38  
39 <sup>2</sup>With better control of infections and other causes of early mortality,  
40  
41 CAs are becoming increasingly important drivers of child survival and  
42  
43 health in low- and middle-income countries.<sup>1 3</sup> CAs affect approximately  
44  
45 an estimated 1 in 33 newborns, contribute each year to 300,000 deaths  
46  
47 in the first month of life, and are associated with 3·2 million birth-related  
48  
49 disabilities.<sup>3</sup> Accordingly, the World Health Assembly has emphasized  
50  
51 the urgent need for action to help prevent, diagnose, and provide timely  
52  
53 interventions.<sup>1</sup> Data on the prevalence and mortality associated with CAs  
54  
55 are scarce in many low- and middle-income countries, with most reports  
56  
57  
58  
59  
60

1  
2  
3  
4 originating in high-income areas. For example, in a population-based  
5  
6 study of livebirths with CAs in the United Kingdom, the 20-year survival  
7  
8 rate was 85.5%.<sup>4</sup> Similarly, the 25-year survival rate among livebirths  
9  
10 with CAs in New York state was 82.5%,<sup>5</sup> with a documented  
11  
12 improvement from the 1980s (78.1% from 1983 –1988) to the early  
13  
14 2000s (89.3% from 2001- 2006). Among CAs, the major drivers of  
15  
16 mortality were cardiovascular anomalies (51.1%) and chromosomal  
17  
18 anomalies (33.1%). In Korea, infant mortality among babies with CAs  
19  
20 was 6.8/10,000 live births, and foetal mortality was 13.5/10,000 total  
21  
22 births.<sup>6</sup>  
23  
24  
25  
26  
27  
28  
29  
30

31 However, local action, whether focused on primary prevention or on  
32  
33 improving care, is most effective when based on reliable information  
34  
35 about the key indicators of the causes and outcomes of CAs in the  
36  
37 underlying population. In this study, we implemented an integrated  
38  
39 approach to generate these data in a systematic cohort of women,  
40  
41 tracked from mid-gestation through the second year of life of their  
42  
43 children, to assess the prevalence of CAs, the burden of potentially  
44  
45 modifiable risk factors, and the survival of affected children, as a basis  
46  
47 for better prevention and care.<sup>7</sup>  
48  
49  
50  
51  
52  
53  
54  
55

## 56 **Methods**

57  
58  
59  
60

1  
2  
3  
4 **Setting.** The Prince Sultan Military Medical City (PSMMC) is a tertiary  
5  
6 teaching institution with 1,250 beds and approximately 10,000 annual  
7  
8 deliveries. PSMMC primarily serves Saudi army personnel and their  
9  
10 families and is a referral centre for the other 16 military hospitals in the  
11  
12 Kingdom of Saudi Arabia. The foetal medicine unit includes advanced  
13  
14 imaging facilities, including 3D and 4D scanning. The paediatric  
15  
16 department includes all major subspecialties, including medical genetics,  
17  
18 paediatric surgery, and paediatric cardiology.  
19  
20  
21  
22  
23  
24  
25

26 **Study design** This is an observational, prospective cohort study with a  
27  
28 nested case-control study. The eligible cohort includes pregnancies of  
29  
30 women who had their antenatal care and their routine antenatal anomaly  
31  
32 ultrasound scan examination (USS) between 18 weeks and 22 weeks of  
33  
34 gestation at PSMMC from 1 July 2010 through 30 June 2013 (figure 1).  
35  
36  
37  
38

39 In addition, Saudi women who are eligible for their antenatal care at  
40  
41 PSMMC, but who did not have an antenatal screening ultrasound  
42  
43 examination and later delivered at PSMMC, are also included in the  
44  
45 study.  
46  
47  
48  
49  
50  
51

52 **Inclusions and exclusions.** Pregnancy outcomes included in the study  
53  
54 were live births, stillbirths (foetal deaths at 20 weeks' gestation or later),  
55  
56 and pregnancies electively terminated because of foetal anomalies  
57  
58 (ETOPFAs). The study excluded spontaneous abortions, pregnancies  
59  
60

1  
2  
3  
4 referred from other hospitals because of a diagnosis of a foetal anomaly,  
5  
6 and babies with CAs delivered elsewhere and referred to PSMMC for  
7  
8 evaluation and management.  
9

10  
11  
12  
13  
14 **Evaluations.** Initial antenatal screening tests included a complete blood  
15  
16 count, liver and kidney function tests, blood group and antibody  
17  
18 screening, rubella and Toxoplasma status, hepatitis B screen, random  
19  
20 blood sugar and HbA1c levels, VDRL, sickle cell screen and urine  
21  
22 analysis. A glucose tolerance test was performed at 24-28 weeks of  
23  
24 gestation.  
25  
26  
27  
28  
29  
30  
31  
32

33 When a structural birth defect was diagnosed or suspected antenatally,  
34  
35 mothers were counselled by one of the investigators (MSR, AMK),  
36  
37 demographic and exposure information was gathered, and both parents  
38  
39 were scheduled within 2-4 weeks to attend a dedicated clinic developed  
40  
41 for the study. At that time, a detailed diagnostic and care plan was  
42  
43 developed, which may have included further blood tests and foetal  
44  
45 imaging, or amniocentesis, chorionic villous and/or foetal blood sampling  
46  
47 for genetic studies. Consent was requested for cord blood collection for  
48  
49 future molecular testing.  
50  
51  
52  
53  
54  
55

56 On the first day of life, all newborns in the cohort (with and without CAs)  
57  
58 were examined by a paediatrician as part of the first clinical screening  
59  
60

1  
2  
3  
4 examination. Babies with CA, whether identified antenatally or  
5  
6 postnatally, underwent diagnostic investigations as clinically indicated  
7  
8 (e.g., echocardiogram, cardiac catheterization, or other imaging studies;  
9  
10 metabolic and molecular testing) and were referred to the appropriate  
11  
12 subspecialists. A clinical geneticist evaluated all babies with suspected  
13  
14 syndromes or multiple CAs. A letter was distributed to all clinical  
15  
16 departments describing the study and requesting that they inform the  
17  
18 study team about all infants and children with CAs born at PSMHC.  
19  
20  
21  
22  
23  
24  
25

26 **Evaluations for specific congenital anomalies.** If congenital heart disease  
27  
28 (CHD) was detected or suspected antenatally on USS examination, the  
29  
30 mother was referred to the paediatric cardiologist for a foetal  
31  
32 echocardiogram. All these infants were also re-evaluated after birth by a  
33  
34 paediatric cardiologist. Isolated atrial septal defects (ASDs II) were re-  
35  
36 evaluated at 6 to 12 months of age, and if the echocardiogram showed  
37  
38 no evidence of ASD II at the time, the infant was not considered a case.  
39  
40  
41  
42 Congenital hydronephrosis (HN) was graded using the Society of Foetal  
43  
44 Urology grading system.<sup>8</sup> Babies with grade one HN were given a repeat  
45  
46 US examination within the first year of life; if HN had resolved, the baby  
47  
48 was not considered a case. Chromosomal analysis was performed  
49  
50 was not considered a case. Chromosomal analysis was performed  
51  
52 according to standard procedures, and a minimum of 20 metaphases  
53  
54 were analysed (Applied Imaging CytoVision Karyotyping System).  
55  
56 Reports followed the International System of Human Cytogenetic  
57  
58 Nomenclature (ISCN 2013). Molecular studies were performed at the  
59  
60

1  
2  
3  
4 Biocenthia Health Group in Germany (<http://www.bioscientia.de/en/>), the  
5  
6 Mayo Medical Laboratories in the United States, and at the  
7  
8 Developmental Genetic Laboratory at King Faisal specialist hospital and  
9  
10 research centre in Saudi Arabia.  
11  
12  
13  
14  
15  
16

17 **Nested case-control study.** The nested case-control study included as  
18 cases all women in the cohort with a pregnancy diagnosed with a CA  
19 and as controls a random sample of women in the cohort with a normal  
20 USS. The random sample was generated daily by taking the morning list  
21 of scheduled USS and using a random number generator  
22 (<http://www.random.org>) to select potential controls so that the control  
23 sample would eventually be at least as large as the estimated total  
24 number of cases. If a woman initially selected as a control had a  
25 pregnancy diagnosed with a birth defect at the initial date or later, she  
26 was then included in the case group. Investigators administered an in-  
27 person structured interview to case and control mothers. The interview  
28 included information about age (for both parents); weight before  
29 pregnancy; height; parity; family income (father's income or combined  
30 parental income if the mother worked); maternal education level  
31 (illiterate, primary school graduate, secondary school graduate, or  
32 university graduate); parental occupation (mother; housewife, teacher,  
33 student and others, father; soldier, officer or civilian employee); folic acid  
34 (FA) supplement use (regular use before and during the 1<sup>st</sup> trimester of  
35 pregnancy; irregular or only postconception use; no use or uncertain use  
36  
37  
38  
39  
40  
41  
42  
43  
44  
45  
46  
47  
48  
49  
50  
51  
52  
53  
54  
55  
56  
57  
58  
59  
60



1  
2  
3  
4 as per the mother's report); parental smoking (one or both parents  
5 smoking during the current pregnancy); maternal radiation exposure  
6 during the first trimester; maternal diabetes (overt or gestational) as  
7 defined by the International Association of Diabetes and Pregnancy  
8 study groups <sup>9</sup> and HbA1c level; family history of CAs (in previous  
9 pregnancies and in maternal or paternal lineages); drug and medication  
10 use during the first trimester; and chronic maternal systemic illnesses  
11 (hypothyroidism, epilepsy, depression, essential hypertension, and  
12 bronchial asthma). Consanguinity was defined as women being first or  
13 second cousins to their husbands (supplementary file).  
14  
15  
16  
17  
18  
19  
20  
21  
22  
23  
24  
25  
26  
27  
28  
29  
30

31 **Follow-up.** Case infants and control infants were examined in the  
32 dedicated study clinic at 1, 6, 12, 18 and 24 months of age. Two  
33 neonatologists and a clinical geneticist supervised the clinic. Babies with  
34 CAs also continued to be followed by the relevant subspecialty clinics.  
35 The remaining cohort (babies without CAs not selected as controls) was  
36 re-examined at 4-8 weeks by the paediatrician for a second screening  
37 examination. A head ultrasound and a postductal pulse oximetry reading  
38 were completed in all babies attending the clinics. If the O<sub>2</sub> saturation  
39 was below 95%, the baby was referred to the paediatric cardiologist for  
40 evaluation. If any CAs were detected at the second screening  
41 examination, the babies were referred to the genetics clinic for further  
42 evaluation and diagnosis. If the second screening examination proved to  
43 be normal, then no further follow-up was arranged. However, if CAs  
44  
45  
46  
47  
48  
49  
50  
51  
52  
53  
54  
55  
56  
57  
58  
59  
60

1  
2  
3  
4 were discovered later in babies up to 2 years of age, they were included  
5  
6 in the study.  
7  
8  
9  
10

11  
12 **Case review, coding, classification.** Congenital anomalies were coded  
13 following the International Statistical Classification of Diseases and  
14 Related Health Problems, 10<sup>th</sup> revision, (ICD10, WHO-2010) according  
15 to the European Concerted Action on Congenital Anomalies and Twins  
16 (EUROCAT) recommended procedures.<sup>10</sup> We did not include isolated  
17 minor anomalies or prematurity-related conditions such as patent ductus  
18 arteriosus or hydrocephalus complicating intraventricular haemorrhage  
19 diagnosed in preterm babies (<37 completed weeks of gestation). Data  
20 were entered in a version of EUROCAT Data Management Program  
21 (EDMP) modified to include control records and the additional variables  
22 generated by the case-control study and the follow up.  
23  
24  
25  
26  
27  
28  
29  
30  
31  
32  
33  
34  
35  
36  
37  
38  
39  
40  
41

42 **Patient and public involvement:** Our long-term experience with the  
43 families and their offspring has helped us to shape the research question  
44 and the study design. All families recruited were informed about the  
45 study objectives. None of the parents were involved in the study design.  
46  
47  
48  
49  
50  
51  
52  
53  
54  
55  
56  
57  
58  
59  
60  
61  
62  
63  
64  
65  
66  
67  
68  
69  
70  
71  
72  
73  
74  
75  
76  
77  
78  
79  
80  
81  
82  
83  
84  
85  
86  
87  
88  
89  
90  
91  
92  
93  
94  
95  
96  
97  
98  
99  
100  
101  
102  
103  
104  
105  
106  
107  
108  
109  
110  
111  
112  
113  
114  
115  
116  
117  
118  
119  
120  
121  
122  
123  
124  
125  
126  
127  
128  
129  
130  
131  
132  
133  
134  
135  
136  
137  
138  
139  
140  
141  
142  
143  
144  
145  
146  
147  
148  
149  
150  
151  
152  
153  
154  
155  
156  
157  
158  
159  
160  
161  
162  
163  
164  
165  
166  
167  
168  
169  
170  
171  
172  
173  
174  
175  
176  
177  
178  
179  
180  
181  
182  
183  
184  
185  
186  
187  
188  
189  
190  
191  
192  
193  
194  
195  
196  
197  
198  
199  
200  
201  
202  
203  
204  
205  
206  
207  
208  
209  
210  
211  
212  
213  
214  
215  
216  
217  
218  
219  
220  
221  
222  
223  
224  
225  
226  
227  
228  
229  
230  
231  
232  
233  
234  
235  
236  
237  
238  
239  
240  
241  
242  
243  
244  
245  
246  
247  
248  
249  
250  
251  
252  
253  
254  
255  
256  
257  
258  
259  
260  
261  
262  
263  
264  
265  
266  
267  
268  
269  
270  
271  
272  
273  
274  
275  
276  
277  
278  
279  
280  
281  
282  
283  
284  
285  
286  
287  
288  
289  
290  
291  
292  
293  
294  
295  
296  
297  
298  
299  
300  
301  
302  
303  
304  
305  
306  
307  
308  
309  
310  
311  
312  
313  
314  
315  
316  
317  
318  
319  
320  
321  
322  
323  
324  
325  
326  
327  
328  
329  
330  
331  
332  
333  
334  
335  
336  
337  
338  
339  
340  
341  
342  
343  
344  
345  
346  
347  
348  
349  
350  
351  
352  
353  
354  
355  
356  
357  
358  
359  
360  
361  
362  
363  
364  
365  
366  
367  
368  
369  
370  
371  
372  
373  
374  
375  
376  
377  
378  
379  
380  
381  
382  
383  
384  
385  
386  
387  
388  
389  
390  
391  
392  
393  
394  
395  
396  
397  
398  
399  
400  
401  
402  
403  
404  
405  
406  
407  
408  
409  
410  
411  
412  
413  
414  
415  
416  
417  
418  
419  
420  
421  
422  
423  
424  
425  
426  
427  
428  
429  
430  
431  
432  
433  
434  
435  
436  
437  
438  
439  
440  
441  
442  
443  
444  
445  
446  
447  
448  
449  
450  
451  
452  
453  
454  
455  
456  
457  
458  
459  
460  
461  
462  
463  
464  
465  
466  
467  
468  
469  
470  
471  
472  
473  
474  
475  
476  
477  
478  
479  
480  
481  
482  
483  
484  
485  
486  
487  
488  
489  
490  
491  
492  
493  
494  
495  
496  
497  
498  
499  
500  
501  
502  
503  
504  
505  
506  
507  
508  
509  
510  
511  
512  
513  
514  
515  
516  
517  
518  
519  
520  
521  
522  
523  
524  
525  
526  
527  
528  
529  
530  
531  
532  
533  
534  
535  
536  
537  
538  
539  
540  
541  
542  
543  
544  
545  
546  
547  
548  
549  
550  
551  
552  
553  
554  
555  
556  
557  
558  
559  
560  
561  
562  
563  
564  
565  
566  
567  
568  
569  
570  
571  
572  
573  
574  
575  
576  
577  
578  
579  
580  
581  
582  
583  
584  
585  
586  
587  
588  
589  
590  
591  
592  
593  
594  
595  
596  
597  
598  
599  
600  
601  
602  
603  
604  
605  
606  
607  
608  
609  
610  
611  
612  
613  
614  
615  
616  
617  
618  
619  
620  
621  
622  
623  
624  
625  
626  
627  
628  
629  
630  
631  
632  
633  
634  
635  
636  
637  
638  
639  
640  
641  
642  
643  
644  
645  
646  
647  
648  
649  
650  
651  
652  
653  
654  
655  
656  
657  
658  
659  
660  
661  
662  
663  
664  
665  
666  
667  
668  
669  
670  
671  
672  
673  
674  
675  
676  
677  
678  
679  
680  
681  
682  
683  
684  
685  
686  
687  
688  
689  
690  
691  
692  
693  
694  
695  
696  
697  
698  
699  
700  
701  
702  
703  
704  
705  
706  
707  
708  
709  
710  
711  
712  
713  
714  
715  
716  
717  
718  
719  
720  
721  
722  
723  
724  
725  
726  
727  
728  
729  
730  
731  
732  
733  
734  
735  
736  
737  
738  
739  
740  
741  
742  
743  
744  
745  
746  
747  
748  
749  
750  
751  
752  
753  
754  
755  
756  
757  
758  
759  
760  
761  
762  
763  
764  
765  
766  
767  
768  
769  
770  
771  
772  
773  
774  
775  
776  
777  
778  
779  
780  
781  
782  
783  
784  
785  
786  
787  
788  
789  
790  
791  
792  
793  
794  
795  
796  
797  
798  
799  
800  
801  
802  
803  
804  
805  
806  
807  
808  
809  
810  
811  
812  
813  
814  
815  
816  
817  
818  
819  
820  
821  
822  
823  
824  
825  
826  
827  
828  
829  
830  
831  
832  
833  
834  
835  
836  
837  
838  
839  
840  
841  
842  
843  
844  
845  
846  
847  
848  
849  
850  
851  
852  
853  
854  
855  
856  
857  
858  
859  
860  
861  
862  
863  
864  
865  
866  
867  
868  
869  
870  
871  
872  
873  
874  
875  
876  
877  
878  
879  
880  
881  
882  
883  
884  
885  
886  
887  
888  
889  
890  
891  
892  
893  
894  
895  
896  
897  
898  
899  
900  
901  
902  
903  
904  
905  
906  
907  
908  
909  
910  
911  
912  
913  
914  
915  
916  
917  
918  
919  
920  
921  
922  
923  
924  
925  
926  
927  
928  
929  
930  
931  
932  
933  
934  
935  
936  
937  
938  
939  
940  
941  
942  
943  
944  
945  
946  
947  
948  
949  
950  
951  
952  
953  
954  
955  
956  
957  
958  
959  
960  
961  
962  
963  
964  
965  
966  
967  
968  
969  
970  
971  
972  
973  
974  
975  
976  
977  
978  
979  
980  
981  
982  
983  
984  
985  
986  
987  
988  
989  
990  
991  
992  
993  
994  
995  
996  
997  
998  
999  
1000

1  
2  
3  
4 provider through social media, newspapers, presentation at various  
5  
6 conferences, and scientific publications.  
7  
8  
9

10  
11  
12 **Institutional ethics review.** The study was approved by the Ethical  
13  
14 Committee of the PSMC (Project No. 366, series of 2009).  
15  
16

### 17 18 19 **Statistical analysis.**

20  
21  
22 Odds ratios for the association between risk factors and CAs were  
23  
24 estimated using multiple logistic regression in a two-step process. An  
25  
26 initial set of variables was selected by univariate logistic regression as  
27  
28 being associated with CA risk ( $p < 0.05$ ). Variables highly correlated with  
29  
30 other variables (e.g., insulin use) were not entered into the model. This  
31  
32 initial variable set was then reduced by stepwise backward elimination to  
33  
34 produce a more parsimonious model. The final model retained the  
35  
36 following covariates: consanguinity, maternal age group, education level,  
37  
38 diabetes and history of siblings with a congenital anomaly. The model fit  
39  
40 was assessed with the Hosmer and Lemeshow's goodness of fit test and  
41  
42 by calculating Nagelkerke R<sup>2</sup>. Statistical analysis was performed with  
43  
44 SPSS for Windows, version 15 (SPSS Inc., Chicago, Illinois).  
45  
46  
47  
48  
49  
50  
51

### 52 53 **Results**

54  
55  
56 Of the 31,032 birth outcomes of the 30,351 women followed since  
57  
58 pregnancy, 30,753 (99.1%) occurred at PSMC (figure 2). Of these,  
59  
60

1  
2  
3  
4 2,107 were spontaneous abortions (6.9%) and were not included in the  
5  
6 study, leaving 28,646 eligible births (27,726 singleton births and 920  
7  
8 multiple births). The overall stillbirth rate was slightly less than 1% (figure  
9  
10 2).

11  
12  
13  
14  
15 **Birth defect occurrence, detection, and mortality.** Of the 28,646 eligible  
16 pregnancy outcomes, 1,179 were diagnosed with a CA, for an overall  
17 prevalence of 412/10,000 (95% CI 388.6 to 434.9) total births, or 1 in 24  
18 births. Of these 1,179 cases, 38 (3.2%) were stillbirths, and 18 (1.5%)  
19 were electively terminated because of lethal malformations (13 with  
20 anencephaly, 3 with severe hydrops foetalis and cystic hygroma, 1 with  
21 Meckel-Gruber syndrome and 1 with bilateral renal agenesis) (table 1).  
22 The antenatal detection rate among women who has had an antenatal  
23 ultrasound screening examination was 70.6% (561/795). In 90% of these  
24 cases (505/561), the diagnosis was made by ultrasound scan at 22  
25 weeks of gestation or later. Of the 618 babies diagnosed postnatally,  
26 296 (47.9%) were diagnosed at birth, 239 (38.7%) between 1 and 7  
27 days, 29 (4.7%) between 1 and 4 weeks, 52 (8.4%) between 1 and 12  
28 months, and 2 (0.3%) after one year of age. Mortality among livebirths  
29 with CAs (table 1) was 14.1% in the first year, nearly half of which  
30 occurred in the first week of life, with a total mortality of 15.8% by the  
31 end of the second year of life. Mortality at two years was 0.9% in the  
32 unaffected cohort (0.24% for live births). Among the controls, there were  
33 8 stillbirths, two deaths because of prematurity and its complications and  
34 one death at 2 years of age because of acute fulminating leukaemia.  
35  
36  
37  
38  
39  
40  
41  
42  
43  
44  
45  
46  
47  
48  
49  
50  
51  
52  
53  
54  
55  
56  
57  
58  
59  
60

### Contribution of specific congenital anomalies.

Approximately half of the overall birth prevalence was due to congenital heart disease and central nervous system anomalies. Neural tube defects occurred at a rate of 19 per 10,000 (95% CI, 13.8 to 23.9) (1 in 526 births). Severe CHD occurred at a rate of 32 per 10,000 (95% CI, 25.3 to 38.3) (1 in 313 births) and accounted for 21.4% of all CHD cases. Chromosomal anomalies whose risk is associated with increased maternal age (trisomies 21, 18, and 13) occurred with a combined prevalence of 25 per 10,000 (95% CI, 19.6 to 31.3) (1 in 392 births). Trisomy 21 accounted for most cases of chromosomal anomalies, with a prevalence of 22 per 10,000 (95% CI, 16.7 to 27.4) or 1 in 456 births (table 2).

Two-thirds of all cases of CAs (773/1179, 65.6%) were isolated (e.g., they involved a single body system) (table 3).

**Risk factors.** As a proxy of risk factor prevalence in the underlying population, we used the frequency of selected maternal or parental risk factors for CAs among controls in the nested case-control study (figure 3). The most frequent potentially modifiable factors included lack of periconception folic acid supplement use, consanguinity, high body mass index, advanced maternal age, smoking (first or second-hand) and maternal diabetes. Nearly 6% of non-primiparous women had one prior child with a major CA. In the univariate analysis, the nested case-control

1  
2  
3  
4 study (table 4) detected overall increased odds ratios for all CAs  
5  
6 combined for consanguinity, advanced maternal age, high parity,  
7  
8 maternal illiteracy, maternal university education, X-ray exposure during  
9  
10 pregnancy, maternal diabetes, and positive family history of CA in a  
11  
12 sibling. Increased odds ratios with confidence intervals, including unity,  
13  
14 were also found for maternal depression and hypertension (table 4). In  
15  
16 the multiple logistic regression model, only first-degree consanguinity  
17  
18 (OR 1.5, 95% CI 1.28 to 1.81), maternal age of more than forty years  
19  
20 (OR 2.1, 95% CI 1.35 to 3.3), maternal illiteracy (OR 1.4, 95% CI 1.17 to  
21  
22 1.7), maternal university level education, (OR 1.74, 95% CI 1.24 to  
23  
24 2.44), maternal diabetes mellitus (OR 1.98, 95% CI 1.33 to 2.95) and  
25  
26 history of a sibling with an anomaly (OR 1.49, 95% CI 1.04 to 2.12) were  
27  
28 retained in the model (table 5). The Hosmer and Lemeshow goodness of  
29  
30 fit p value was 0.08, and Nagelkerke R<sup>2</sup> was 0.055, explaining 6% of the  
31  
32 effect on CAs.  
33  
34  
35  
36  
37  
38  
39  
40  
41

42 Of the 223 mothers with DM who had CA-affected fetuses (223/1,179,  
43  
44 18.9%), 36 (3%) had overt DM (ODM), and 187 (15.7%) had gestational  
45  
46 DM (GDM). Of the mothers with GDM, 50 (26.7%) required insulin.  
47  
48 Among the controls, 200 mothers had diabetes (200/1,179, 15.8%), of  
49  
50 whom 12 (0.9%) had ODM, and 188 (15.9%) had GDM. Of the latter, 29  
51  
52 (14.5%) required insulin.  
53  
54  
55  
56  
57  
58

## 59 Discussion

60

1  
2  
3  
4  
5  
6 This longitudinal study of CAs in a pregnancy cohort in Saudi Arabia,  
7 followed from mid-gestation through age 2 years, had three integrated  
8 aims: to describe the population's risk factor profile, document the  
9 associated birth prevalence of CAs, and assess survival as a critical  
10 health outcome.<sup>7</sup> Gathering information about these three critical areas  
11 is crucial when planning and evaluating policies and interventions, be  
12 they aimed at primary prevention (e.g., folic acid fortification to prevent  
13 neural tube defects) or at improving care.  
14  
15  
16  
17  
18  
19  
20  
21  
22  
23  
24  
25  
26

27 The burden of CAs was high in this population. The study documented a  
28 remarkably high birth prevalence of CAs of 412 per 10,000 or 1 in 24  
29 total births. This rate is higher than that reported in studies from many  
30 high-income countries, as those reported by EUROCAT (261/10,000  
31 births),<sup>11</sup> BINOCAR (206/10,000 births),<sup>12</sup> and the Bradford (BIB) study  
32 (305/10,000).<sup>13</sup> This prevalence of CAs is also higher than that  
33 previously reported from Saudi Arabia (115 to 257 per 10,000 live  
34 births).<sup>14-16</sup> Although some studies report an even higher prevalence,  
35 e.g., such as an antenatal CA prevalence of 521/10,000 pregnancies  
36 screened, and a prevalence among livebirths of 465/10,000,<sup>17</sup> these  
37 figures may be overestimates of the true prevalence because of the  
38 inclusion of mothers referred from other institutions. In the current study,  
39 we strove to obtain as complete an ascertainment as possible by  
40 initiating follow-up in pregnancy and extending it through the second  
41 year of life, by including stillbirths and elective termination of  
42  
43  
44  
45  
46  
47  
48  
49  
50  
51  
52  
53  
54  
55  
56  
57  
58  
59  
60



1  
2  
3  
4 pregnancies for foetal anomalies (ETOPFAs), and by successfully  
5  
6 including some genetic conditions that tend to be diagnosed after the  
7  
8 newborn period.  
9

10  
11 However, the high prevalence of CAs is likely to be due not only to the  
12  
13 completeness of the ascertainment but also to the high frequency of  
14  
15 adverse risk factors in the underlying population, as documented in the  
16  
17 controls of the nested case-control study. When focusing on factors that  
18  
19 are potentially modifiable, three such factors seem to stand out. The first  
20  
21 is insufficient folic acid use in this cohort (<10% in the periconception  
22  
23 period). The rate of neural tube defects was 19 per 10,000/births (table  
24  
25 2), at least three times higher than the rate of 6 per 10,000/births, which  
26  
27 seems achievable by providing sufficient folic acid to women of  
28  
29 childbearing age.<sup>18 19</sup> Although legislation requiring the mandatory  
30  
31 fortification of flour had been in place in Saudi Arabia for years prior to  
32  
33 this study (Kingdom of Saudi Arabia, 2000; Food fortification initiative,  
34  
35 2013),<sup>20 21</sup> our findings suggest that there are gaps in coverage or  
36  
37 effectiveness, which could be evaluated with nutrition or blood folate  
38  
39 surveys. Such information would provide important evidence to improve  
40  
41 folate sufficiency in the population, with its attendant health benefits,  
42  
43 including a substantial reduction in the burden of neural tube defects.  
44  
45 Because of the inclusion of stillbirths and pregnancy terminations, this  
46  
47 study also provides a fuller estimate of the potential benefits of primary  
48  
49 prevention than if only livebirths had been identified (representing just  
50  
51 over half of all cases, 30/54).  
52  
53  
54  
55  
56  
57  
58  
59  
60



1  
2  
3  
4 The second factor is maternal diabetes (tables 4 and 5). Diabetes is an  
5  
6 established risk factor for many CAs, and diabetes control before  
7  
8 conception has been shown to reduce and nearly normalize CA risk.<sup>9 22</sup>  
9  
10 <sup>23</sup> Several avenues for preventing diabetes and its health effects are  
11  
12 available, including population screening (many diabetic women are  
13  
14 undiagnosed), health care and counselling, and education on healthy  
15  
16 lifestyle and dietary choices starting from childhood. The current  
17  
18 reported prevalence in Saudi Arabia of overt diabetes in women above  
19  
20 age 40 years ranges from 7.7% – 21.7%.<sup>24 - 26</sup> In the study cohort, overt  
21  
22 diabetes was observed in 2% of women and increased in women 30  
23  
24 years old or older. Al-Nozha and colleagues<sup>27</sup> reported a prevalence of  
25  
26 overt diabetes of 11.6% in women aged 30-39 years and >22% in  
27  
28 women aged ≥40 years compared to 2.7% and 7.1% in our study,  
29  
30 respectively. Though lower than these estimates, the prevalence of overt  
31  
32 diabetes in the study cohort is alarmingly high.  
33  
34  
35  
36  
37  
38  
39  
40

41 Third, we observed a high rate of parental consanguinity (54.5%),  
42  
43 especially first-cousin marriages (48.0%). These marriages are common  
44  
45 in many parts of the Middle East, Africa, and the Indian subcontinent,<sup>28-30</sup>  
46  
47 with one estimate suggesting that “one billion people live in communities  
48  
49 with a preference for consanguineous marriage” (Hamamy, 2012).<sup>29</sup> This  
50  
51 preference has deep social roots. Nevertheless, education combined  
52  
53 with preconception and premarital counselling can be important  
54  
55 prevention strategies by focusing on increasing awareness to allow  
56  
57 couples to make more informed choices. Close consanguinity is a known  
58  
59  
60

1  
2  
3  
4 risk factor for CAs,<sup>30</sup> as well as Mendelian conditions such as inborn  
5 errors of metabolism (occurring in 1 in 770 births in this study), as  
6 confirmed in prior reports from Saudi Arabia and from the world  
7 literature.<sup>31 32</sup>  
8  
9  
10  
11  
12  
13  
14

15 We did not diagnose cases of congenital rubella syndrome. This is likely  
16 due to the active immunization programme in Saudi Arabia, with a  
17 measles, mumps and rubella vaccine uptake of 97%. In addition,  
18 preschool age girls are given a booster vaccine against rubella.  
19  
20  
21  
22  
23  
24  
25  
26  
27

28 In a prior publication, we reported a low regular (periconception) folic  
29 acid (FA) intake (9.7%) in this study population<sup>33</sup> and suggested  
30 fortification of rice in addition to wheat, complemented by education  
31 programmes supporting FA supplementation, as an efficient strategy to  
32 achieve folate sufficiency in the population.  
33  
34  
35  
36  
37  
38  
39

40 Finally, our findings emphasize the impact of CAs in this  
41 population by documenting not only birth prevalence but also the  
42 associated early mortality (table 1), which was 15.8% by the  
43 second year of life (nearly all in the first year). Further supporting  
44 the high impact of CAs are the findings by Majeed-Saidan and  
45 colleagues,<sup>34</sup> who reported that 36% of deaths in a large neonatal  
46 intensive care unit in Riyadh were due to lethal CAs. These  
47 findings highlight the crucial importance and urgency to improve  
48 care in addition to primary prevention.  
49  
50  
51  
52  
53  
54  
55  
56  
57  
58  
59  
60

1  
2  
3  
4  
5  
6  
7 This study demonstrated the importance of the “triple  
8  
9 surveillance” programme, suggested by Botto and Masteroiacova,<sup>4</sup>  
10  
11 for identifying the risk factors for CAs (causes), estimating the  
12  
13 burden of the disease (prevalence), and assessing disease  
14  
15 outcome (mortality). This will ultimately lead to disease burden  
16  
17 reduction or prevention by instituting appropriate interventions.  
18  
19  
20  
21  
22  
23  
24

25 The study has limitations. Because of the cohort design, the  
26  
27 resulting sample size did not allow a more detailed analysis of  
28  
29 specific CA groups. Estimates of some key risk factors, such as  
30  
31 folic acid insufficiency, were based on maternal reports (e.g.,  
32  
33 reported supplement use) rather than biomarkers. Furthermore,  
34  
35 the pregnancy cohort was mainly from families of Saudi army  
36  
37 personnel dependents. Although the Saudi Army recruits from all  
38  
39 sectors of Saudi society, a broader survey of the Saudi population  
40  
41 would provide additional information to better assess gaps and  
42  
43 opportunities for prevention and care nationwide.  
44  
45  
46  
47  
48  
49  
50

51 **Conclusion.** This longitudinal surveillance programme that encompassed  
52  
53 the causal chain from risk factors to health outcomes documented  
54  
55 several opportunities to reduce the burden of CAs through primary  
56  
57 prevention and better care. Folic acid fortification, preconception  
58  
59  
60

1  
2  
3  
4 diabetes screening, and consanguinity-related counselling could have  
5 significant health benefits in this cohort and arguably in the larger Saudi  
6 population, particularly if associated with a national CA monitoring  
7 programme to support and track the impact of interventions.  
8  
9  
10  
11  
12  
13  
14

### 15 **Acknowledgments**

16  
17 We thank the Medical Services Directorate of the Saudi Armed Forces  
18 and the PSMCMC directorate for their support during the initiation and  
19 execution of the study; the study's advisory board (Eduardo Castilla,  
20 Pierpaolo Mastroiacovo, Ester Garne, Fowzan Alkuraya, and Wesam  
21 Kurdi) for advice and guidance throughout the study; and the study  
22 secretaries for their commitment and enthusiasm.  
23  
24  
25  
26  
27  
28  
29  
30  
31

### 32 **Author's statement:**

33  
34  
35 **AMK** study conception and design, revised the manuscript. **MAMS**,  
36 study conception and design, drafting and revising the manuscript.,  
37  
38 **MSR**, study design, data collection. **AMH**, data collection, revised the  
39 manuscript. **LDB**, study design, critically revised the manuscript for  
40 intellectual content. **HSB**, statistical analysis and revised the manuscript.  
41  
42 **ANA**, study design, data collection, revised the manuscript. All authors  
43 approved the submission of the manuscript.  
44  
45  
46  
47  
48  
49  
50  
51  
52  
53  
54

55 **Patient consent form:** n/a  
56  
57  
58  
59

60 **Data sharing statement:**

1  
2  
3  
4 Dataset can be obtained on request through a third party “King  
5  
6 AbdulAziz city for science and technology.  
7  
8  
9

10 Word count: 4,210  
11  
12  
13  
14  
15  
16  
17  
18  
19

## 20 References

- 21  
22  
23  
24 1. World Health Organization. Sixty -Third World Health  
25 Assembly. CA Report by the Secretariat, A63/10. Geneva,  
26 Switzerland: World Health Organization, 2010.  
27  
28  
29  
30  
31  
32  
33
- 34 2. World Health Organization. Global Health Observatory (GHO)  
35 data. Under-five mortality 2016.  
36 [http://www.who.int/gho/child\\_health/mortality/mortality\\_under\\_f](http://www.who.int/gho/child_health/mortality/mortality_under_five_text/en/)  
37 [ive\\_text/en/](http://www.who.int/gho/child_health/mortality/mortality_under_five_text/en/) (accessed 12 December 2017).  
38  
39  
40  
41  
42  
43  
44  
45
- 46 3. Christianson AL, Howson CP, Modell B. Global report on CA:  
47 the hidden toll of dying and disabled children. White Plains  
48 (NY): March of Dimes Defects Foundation 2006.  
49  
50  
51  
52  
53
- 54 4. Tennant PWG, Pearce MS, Bythell M, *et al*.  
55  
56 20-year survival of children born with congenital anomalies:  
57  
58  
59  
60

1  
2  
3  
4 a population-based study. *Lancet* 2010; 375: 649–56.  
5  
6  
7

- 8 5. Wang Y, Hu J, Druschel CM, *et al.* Twenty-Five-Year Survival  
9 of Children with Birth Defects in New York State: A  
10 Population-Based Study. *Birth Defects Research (Part A)*  
11 201;1 91:995-1003.  
12  
13  
14  
15  
16  
17  
18 6. Ko HS, Kim DJ, Chung Y, *et al.* A national cohort study  
19 evaluating infant and fetal mortality caused by birth defects in  
20 Korea. *BMJ Open* 2017;7: e017963. doi:10.1136/bmjopen-  
21 2017-017963  
22  
23  
24  
25  
26  
27  
28  
29 7. Botto LD, Mastroiacovo P. Triple surveillance: a proposal for  
30 an integrated strategy to support and accelerate birth defect  
31 prevention. *Ann. N. Y. Acad. Sci* 2018; (1414):126-36.  
32  
33  
34  
35  
36  
37  
38 8. Avni FE, Maugey-Laulom B, Cassart M, *et al.* Foetal  
39 genitourinary tract. In: Callen PW, ed. *Ultrasonography in*  
40 *Obstetrics and Gynecology*. 5th Ed. New York: W.B. Saunders  
41 2007; 640-75.  
42  
43  
44  
45  
46  
47  
48  
49  
50 9. Metzger BE, Gabbe SG, Persson B, *et al.* International  
51 association of diabetes and pregnancy study groups  
52 recommendations on the diagnosis and classification of  
53  
54  
55  
56  
57  
58  
59  
60

1  
2  
3  
4 hyperglycemia in pregnancy. *Diabetes Care* 2010; 33(3): 676–  
5  
6 82. doi: 10.2337/dc09-1848.  
7  
8  
9

10  
11 10. EUROCAT. Eurocat Guide 1.3. Instructions for registration  
12 and surveillance of congenital anomalies. Belfast, Northern  
13 Ireland University of Ulster 2005. [http://www.eurocat-](http://www.eurocat-network.eu/content/Section%202.4-%2027_Oct2016.pdf)  
14  
15  
16  
17  
18  
19  
20  
21  
22  
23  
24  
25  
26  
27  
28  
29  
30  
31  
32  
33  
34  
35  
36  
37  
38  
39  
40  
41  
42  
43  
44  
45  
46  
47  
48  
49  
50  
51  
52  
53  
54  
55  
56  
57  
58  
59  
60

11. EUROCAT. Prevalence Tables, 2011-2015  
[http://www.eurocat-](http://www.eurocat-network.eu/newprevdata/showPDF.aspx?winx=1896&winy=940&file=allsubgroups.aspx)  
[network.eu/newprevdata/showPDF.aspx?winx=1896&winy=9](http://www.eurocat-network.eu/newprevdata/showPDF.aspx?winx=1896&winy=940&file=allsubgroups.aspx)  
[40&file=allsubgroups.aspx](http://www.eurocat-network.eu/newprevdata/showPDF.aspx?winx=1896&winy=940&file=allsubgroups.aspx) 2015. (accessed 12 December  
2017).

12. Springett A, Budd J, Draper ES, *et al.* Congenital Anomaly  
Statistics 2012 England and Wales, London 2014.  
[www.binocar.org/content/Annual%20report%202012\\_FINAL](http://www.binocar.org/content/Annual%20report%202012_FINAL_nologo.pdf)  
[nologo.pdf](http://www.binocar.org/content/Annual%20report%202012_FINAL_nologo.pdf).

13. Sheridan E, Wright J, Small N, *et al.* Risk factors for  
congenital anomaly in a multiethnic birth cohort: an analysis of  
the Born in Bradford study. *Lancet* 2013; 382(9901): 1350–9.  
doi: 10.1016/S0140-6736(13)61132-0.

14. Al Bu Ali WH, Balaha MH, Al Moghannum MS, *et al.* Risk  
factors and birth prevalence of CA and inborn errors of

1  
2  
3  
4 metabolism in Al Ahsa, Saudi Arabia. *Pan Afr Med J* 2011; 8:  
5  
6 14.  
7  
8  
9

10  
11 15. Fida NM, Al-Aama J, Nichols W, *et al*. A prospective study of  
12 congenital malformations among live born neonates at a  
13 University Hospital in Western Saudi Arabia. *Saudi Med J*  
14 2007; 28(9): 1367–73.  
15  
16  
17  
18

19  
20  
21  
22 16. Refat MY, Al-Moghanem M, McDonald, *et al*. Major CA at  
23 King Fahd Hofuf Hospital: Prevalence, risk factors and  
24 outcome. *Ann Saudi Med* 1995; 15(4): 339–43.  
25  
26  
27  
28

29  
30  
31  
32 17. Sallout B, Obedat N, Shakeel F, *et al*. Prevalence of major  
33 congenital anomalies at King Fahad Medical City in Saudi  
34 Arabia: a tertiary care centre-based study. *Ann Saudi Med*  
35 2015; 35(5): 343–51.  
36  
37  
38  
39

40  
41  
42  
43 18. Kancherla V, Oakley GP Jr, Brent RL. Urgent global  
44 opportunities to prevent CA. *Semin Foetal Neonatal Med*  
45 2014; 19(3): 153–60.  
46  
47  
48  
49

50  
51  
52  
53 19. Youngblood ME, Williamson R, Bell KN, *et al*. Update on  
54 global prevention of folic acid-preventable spina bifida and  
55 anencephaly. *CA Res A Clin Mol Teratol* 2013; 97(10): 658–  
56  
57  
58 63. doi: 10.1002/CAra.23166. Epub 2013.  
59  
60



- 1  
2  
3  
4  
5  
6 20. Kingdom of Saudi Arabia, Ministry of health, Nutritional  
7  
8 department directive. Number 652/1/26, 2000; 13/09/2000.  
9  
10  
11  
12  
13 21. Food Fortification Initiative. (2013).  
14  
15 [http://www.ffinetwork.org/country\\_profiles/country.php?record](http://www.ffinetwork.org/country_profiles/country.php?record=194)  
16 [=194](http://www.ffinetwork.org/country_profiles/country.php?record=194) (accessed 12 December 2017).  
17  
18  
19  
20  
21  
22 22. Kitzmiller JL, Wallerstein R, Correa A, *et al*. Preconception  
23 care for women with diabetes and prevention of major  
24 congenital malformations. *CA Res A Clin Mol Teratol* 2010;  
25 88(10): 791–03. doi: 10.1002/CAra.20734.  
26  
27  
28  
29  
30  
31  
32  
33 23. Simeone RM, Devine OJ, Marcinkevage JA, *et al*/Diabetes  
34 and congenital heart defects: a systematic review, meta-  
35 analysis, and modeling project. *Am J Prev Med* 2014; 48(2):  
36 195–204. doi: 10.1016/j.amepre.2014.09.002.  
37  
38  
39  
40  
41  
42  
43  
44  
45 24. Al-Nuaim AR, Al-Rubean K, Al-Mazrou Y, *et al*. Prevalence of  
46 diabetes mellitus, obesity and hypercholesterolemia in Saudi  
47 Arabia: national chronic disease survey. Riyadh (KSA):  
48 Ministry of Health and King Saud University. ISBN: 1995;  
49 9960-603-01-6.  
50  
51  
52  
53  
54  
55  
56  
57  
58  
59  
60

- 1  
2  
3  
4 25. El-Hazmi M, Warsy A, Al-Swailem AR, *et al.* Diabetes  
5  
6 mellitus as a health problem in Saudi Arabia. East Mediterr  
7  
8 Health J 1998 (4): 58–67.  
9  
10  
11  
12  
13 26. Warsy AS, el-Hazmi MA. Diabetes mellitus, hypertension and  
14  
15 obesity--common multifactorial disorders in Saudis. East  
16  
17 Mediterr Health J 1999; 5(6): 1236–42.  
18  
19  
20  
21  
22 27. Al-Nozha MM, Al-Maatouq M, Al-Mazrou YY. *et al.* Diabetes  
23  
24 mellitus in Saudi Arabia. Saudi Med J 2004; 25(11): 1603–10.  
25  
26  
27  
28  
29 28. El-Mouzan MI, Al-Salloum AA, Al-Herbish AS, *et al.* Regional  
30  
31 variations in the prevalence of consanguinity in Saudi Arabia.  
32  
33 Saudi Med J 2007; 28(12): 1881–4.  
34  
35  
36  
37  
38  
39 29. Hamamy H. Consanguineous marriages: Preconception  
40  
41 consultation in primary health care settings. J Community  
42  
43 Genet 2012; 3(3): 185–92.  
44  
45  
46  
47  
48 30. Majeed-Saidan MA, Ammari AN, AlHashem AM, *et al.* Effect  
49  
50 of consanguinity on CA in Saudi women: results from a nested  
51  
52 case-control study. CA Res A Clin Mol Teratol 2015; 103(2):  
53  
54 100–4. doi: 10.1002/CAra.23331.  
55  
56  
57  
58  
59  
60

- 1  
2  
3  
4 31. Mak CM, Lee HC, Chan AY, *et al.* Inborn errors of  
5  
6 metabolism and expanded newborn screening: review and  
7  
8 update. *Crit Rev Clin Lab Sci* 2013; 50(6): 142–62. doi:  
9  
10 10.3109/10408363.2013.847896.  
11  
12  
13  
14  
15 32. Moammar H, Cheriyan G, Mathew R, *et al.* Incidence and  
16  
17 patterns of inborn errors of metabolism in the Eastern  
18  
19 Province of Saudi Arabia, 1983-2008. *Ann Saudi Med* 2010;  
20  
21 30(4): 271–7. doi: 10.4103/0256-4947.65254.  
22  
23  
24  
25  
26  
27  
28 33. Al Rakaf MS, Kurdi AM, Ammari AN, *et al.* Patterns  
29  
30 of folic acid use in pregnant Saudi women and prevalence of  
31  
32 neural tube defects — Results from a nested case–control  
33  
34 study. *Preventive Medicine Reports* 2 (2015) 572–576.  
35  
36  
37  
38 34. Majeed-Saidan MA, Kashlan FT, Al-Zahrani AA, *et al.* Pattern  
39  
40 of neonatal and postneonatal deaths over a decade (1995--  
41  
42 2004) at a Military Hospital in Saudi Arabia. *Saudi Med J*  
43  
44 2008; 29(6):879-83.  
45  
46  
47  
48  
49  
50  
51

## 52 Tables

53  
54  
55  
56  
57  
58  
59  
60

Legend: Table 1 Distribution and rates of congenital anomalies (CA) among the cohort's pregnancy outcomes, and associated mortality.

|               | Total cohort |     | With CA |      |             | Timing of CA detection |      |           |      | Mortality among livebirths with CA |      |          |     |                            |      |
|---------------|--------------|-----|---------|------|-------------|------------------------|------|-----------|------|------------------------------------|------|----------|-----|----------------------------|------|
|               | No           | %   | No.     | %    | Rate /10000 | Prenatal               |      | Postnatal |      | Overall (0-2 years)                |      | 1st week |     | Total 1 <sup>st</sup> year |      |
| Birth outcome | No           | %   | No.     | %    | Rate /10000 | No.                    | %    | No.       | %    | No.                                | %    | No.      | %   | No.                        | %    |
| Live births   | 28 369       | 99  | 1 123   | 95.3 | 396         | 505                    | 45.0 | 618       | 55   | 177                                | 15.8 | 64       | 5.7 | 158                        | 14.1 |
| Stillbirths   | 259          | 0.9 | 38      | 3.2  | 1467        | 38                     | 100  |           |      |                                    |      |          |     |                            |      |
| ETOPFA        | 18           | 0.1 | 18      | 1.5  | 10000       | 18                     | 100  |           |      |                                    |      |          |     |                            |      |
| Total         | 28 646       |     | 1 179   |      | 412         | 561                    | 47.6 | 618       | 52.4 |                                    |      |          |     |                            |      |

Footnote:

†ETOPFA, Terminations of pregnancy for foetal anomalies.

Stillbirth (foetal death at 20 weeks of gestation or greater).

Table 2 Prevalence and distribution of congenital anomalies, overall and by pregnancy outcome.

| Birth defects | Number* | % | Prevalence per 1000 | Live births | Prevalence per 10000 live birth | Stillbirth | ETOPFA |
|---------------|---------|---|---------------------|-------------|---------------------------------|------------|--------|
|               |         |   |                     |             |                                 |            |        |

|                                   |      |      | births<br>(total<br>births<br>= 28646) |      |      | (total live<br>births<br>= 28376) |     |      |    |      |
|-----------------------------------|------|------|----------------------------------------|------|------|-----------------------------------|-----|------|----|------|
|                                   |      |      |                                        | No.  | %    |                                   | No. | %    | No | (%)  |
| Any                               | 1179 | 100  | 412                                    | 1123 | 95.3 | 396                               | 38  | 3.2  | 18 | 1.5  |
| Nervous system                    | 160  | 13.6 | 56                                     | 129  | 80.6 | 45.7                              | 18  | 11.3 | 13 | 8.1  |
| Neural Tube Defects               | 54   | 4.6  | 19                                     | 30   | 55.5 | 10.6                              | 11  | 20.4 | 13 | 24.1 |
| Anencephalus                      | 26   | 2.2  | 9                                      | 7    | 26.9 | 2.5                               | 8   | 30.8 | 11 | 42.3 |
| Encephalocele                     | 11   | 0.9  | 4                                      | 9    | 81.8 | 3.2                               | 1   | 9.1  | 1  | 9.1  |
| Spina Bifida                      | 17   | 1.4  | 6                                      | 14   | 82.4 | 4.9                               | 2   | 11.8 | 1  | 5.9  |
| Hydrocephaly                      | 25   | 2.1  | 9                                      | 23   | 92.0 | 8.1                               | 2   | 8.0  |    |      |
| Microcephaly                      | 28   | 2.4  | 10                                     | 24   | 85.7 | 8.5                               | 4   | 14.3 |    |      |
| Eye                               | 33   | 2.8  | 12                                     | 33   | 100  | 11.6                              |     |      |    |      |
| Anophthalmus/microphthalmus       | 11   | 0.9  | 4                                      | 11   | 100  | 3.9                               |     |      |    |      |
| Congenital cataract               | 5    | 0.4  | 2                                      | 5    | 100  | 1.8                               |     |      |    |      |
| Congenital glaucoma               | 9    | 0.8  | 3                                      | 9    | 100  | 3.2                               |     |      |    |      |
| Ear, face and neck                | 7    | 0.6  | 2                                      | 7    | 100  | 2.5                               |     |      |    |      |
| Anotia/microtia                   | 7    | 0.6  | 2                                      | 7    | 100  | 2.5                               |     |      |    |      |
| Cardiac                           | 425  | 36.0 | 148                                    | 420  | 90.9 | 148                               | 4   | 0.9  |    |      |
| Severe congenital heart defects * | 91   | 7.7  | 32                                     | 89   | 97.8 | 31.4                              | 2   | 2.2  |    |      |
| Common arterial truncus           | 3    | 0.3  | 1                                      | 3    | 100  | 1.1                               |     |      |    |      |
| Transposition of great vessels    | 13   | 1.1  | 5                                      | 13   | 100  | 4.6                               |     |      |    |      |
| Single ventricle                  | 6    | 0.5  | 2                                      | 6    | 100  | 2.1                               |     |      |    |      |

|                                         |     |      |      |     |      |      |   |      |   |     |
|-----------------------------------------|-----|------|------|-----|------|------|---|------|---|-----|
| Atrioventricular septal defect          | 17  | 1.4  | 6    | 15  | 88.2 | 5.3  | 2 | 11.8 |   |     |
| Tetralogy of Fallot                     | 15  | 1.3  | 5    | 15  | 100  | 5.3  |   |      |   |     |
| Tricuspid atresia and stenosis          | 4   | 0.3  | 1    | 4   | 100  | 1.4  |   |      |   |     |
| Pulmonary valve stenosis                | 22  | 1.9  | 8    | 21  | 95.5 | 7.4  | 1 | 4.5  |   |     |
| Pulmonary valve atresia                 | 9   | 0.8  | 3    | 9   | 100  | 3.2  |   |      |   |     |
| Aortic valve atresia/stenosis           | 5   | 0.4  | 2    | 5   | 100  | 1.8  |   |      |   |     |
| Hypoplastic left heart                  | 15  | 1.3  | 5    | 15  | 100  | 5.3  |   |      |   |     |
| Hypoplastic right heart                 | 5   | 0.4  | 2    | 5   | 100  | 1.8  |   |      |   |     |
| Coarctation of aorta                    | 14  | 1.2  | 5    | 14  | 100  | 4.9  |   |      |   |     |
| Total anomalous pulmonary venous return | 2   | 0.2  | 0.7  | 2   | 100  | 0.7  |   |      |   |     |
| Ventricular septal defect               | 171 | 14.5 | 60   | 171 | 100  | 60.2 |   |      |   |     |
| Atrial septal defect                    | 214 | 18.2 | 74.7 | 214 | 100  | 75.4 |   |      |   |     |
| Oro-facial clefts                       |     |      |      |     |      |      |   |      |   |     |
| Cleft lip with or without palate        | 42  | 3.6  | 14.7 | 35  | 83.3 | 12.3 | 5 | 11.9 | 2 | 4.8 |
| Cleft palate only                       | 11  | 0.9  | 3.8  | 11  | 100  | 3.9  |   |      |   |     |
| Respiratory                             | 33  | 2.8  | 11.5 | 33  | 100  | 11.6 |   |      |   |     |
| Choanal atresia                         | 5   | 0.4  | 1.7  | 5   | 100  | 1.8  |   |      |   |     |
| Digestive system                        | 74  | 6.3  | 25.8 | 71  | 95.9 | 25.0 | 3 | 4.1  |   |     |
| Esophageal atresia with/without fistula | 12  | 1.0  | 4.2  | 12  | 100  | 4.2  |   |      |   |     |
| Ano-rectal atresia and stenosis         | 26  | 2.2  | 9.1  | 25  | 96.2 | 8.8  | 1 | 3.8  |   |     |
| Diaphragmatic hernia                    | 18  | 1.5  | 6.3  | 16  | 88.9 | 5.6  | 2 | 11.1 |   |     |
| Abdominal wall defects                  | 7   | 0.6  | 2.4  | 6   | 85.7 | 2.1  | 1 | 14.3 |   |     |
| Gastroschisis                           | 2   | 0.2  | 0.7  | 1   | 50.0 | 0.4  | 1 | 50.0 |   |     |

|                                  |     |      |      |     |      |       |   |      |   |      |
|----------------------------------|-----|------|------|-----|------|-------|---|------|---|------|
| Omphalocele                      | 5   | 0.4  | 1.7  | 5   | 100  | 1.8   |   |      |   |      |
| Urinary                          | 323 | 27.4 | 113  | 318 | 98.5 | 112.1 | 4 | 1.2  | 1 | 0.3  |
| Bilateral renal agenesis         | 18  | 1.5  | 6.3  | 15  | 83.3 | 5.3   | 2 | 11.1 | 1 | 5.6  |
| Renal dysplasia                  | 60  | 5.1  | 21   | 58  | 96.7 | 20.4  | 2 | 3.3  |   |      |
| Congenital hydronephrosis        | 194 | 16.5 | 67.7 | 194 | 100  | 68.4  |   |      |   |      |
| Genital                          | 127 | 10.8 | 44.3 | 126 | 99.2 | 44.4  | 1 | 0.8  |   |      |
| Hypospadias                      | 108 | 9.2  | 37.7 | 108 | 100  | 38.1  |   |      |   |      |
| Indeterminate sex                | 3   | 0.3  | 1.0  | 2   | 66.7 | 0.7   | 1 | 33.3 |   |      |
| Limb                             | 99  | 8.4  | 34.6 | 92  | 92.9 | 32.4  | 4 | 4.0  | 3 | 3.0  |
| Limb deficiencies, all           | 17  | 1.4  | 5.9  | 17  | 100  | 6.0   |   |      |   |      |
| Upper limb deficiency            | 12  | 1.0  | 4.2  | 12  | 100  | 4.2   |   |      |   |      |
| Lower limb deficiency            | 7   | 0.6  | 2.4  | 7   | 100  | 2.5   |   |      |   |      |
| Club foot - talipes equinovarus  | 19  | 1.6  | 6.6  | 15  | 78.9 | 5.3   | 2 | 10.5 | 2 | 10.5 |
| Hip dislocation and/or dysplasia | 24  | 2.0  | 8.4  | 23  | 95.8 | 8.1   |   |      | 1 | 4.2  |
| Polydactyly                      | 23  | 2.0  | 8.0  | 23  | 100  | 8.1   |   |      |   |      |
| Syndactyly                       | 9   | 0.8  | 3.1  | 9   | 100  | 3.2   |   |      |   |      |
| Musculo-skeletal                 | 40  | 3.4  | 14   | 33  | 82.5 | 11.6  | 7 | 17.5 |   |      |
| Craniosynostosis                 | 6   | 0.5  | 2.1  | 6   | 100  | 2.1   |   |      |   |      |
| Achondroplasia                   | 3   | 0.3  | 1    | 2   | 66.7 | 0.7   | 1 | 33.3 |   |      |
| Thanatophoric dysplasia          | 2   | 0.2  | 0.7  | 2   | 100  | 0.7   |   |      |   |      |
| Jeune syndrome                   | 2   | 0.2  | 0.7  | 1   | 50.0 | 0.4   | 1 | 50.5 |   |      |
| Other malformations              | 42  | 3.6  | 14.7 | 40  | 95.2 | 14.1  | 1 | 2.4  | 1 | 2.4  |
| Situs inversus                   | 10  | 0.8  | 3.5  | 10  | 100  | 3.5   |   |      |   |      |
| By underlying cause              |     |      |      |     |      |       |   |      |   |      |

|                                              |    |     |      |    |      |      |   |      |   |     |
|----------------------------------------------|----|-----|------|----|------|------|---|------|---|-----|
| Chromosomal                                  | 82 | 7.0 | 8.6  | 79 | 96.3 | 27.8 | 3 | 3.7  |   |     |
| Down Syndrome/trisomy 21                     | 63 | 5.3 | 22   | 62 | 98.4 | 21.8 | 1 | 1.6  |   |     |
| Edward syndrome/trisomy 18                   | 8  | 0.7 | 2.8  | 7  | 87.5 | 2.5  | 1 | 12.5 |   |     |
| Patau syndrome/trisomy 13                    | 2  | 0.2 | 0.7  | 2  | 100  | 0.7  |   |      |   |     |
| Turner syndrome                              | 3  | 0.3 | 1    | 2  | 66.7 | 0.7  | 1 | 33.3 |   |     |
| Wolff-Hirschhorn syndrome                    | 1  | 0.1 | 0.3  | 1  | 100  | 0.4  |   |      |   |     |
| Genetic syndromes (including microdeletions) | 38 | 3.2 | 13.2 | 36 | 94.7 | 12.7 | 1 | 2.6  | 1 | 2.6 |
| Teratogenic (Carbamazepine embryopathy)      | 1  | 0.1 | 0.3  | 1  | 100  | 0.4  |   |      |   |     |
| Conditions outside Q chapter of ICD-10       |    |     |      |    |      |      |   |      |   |     |
| Inborn error of metabolism                   | 37 | 3.1 | 12.9 | 37 | 100  | 13.0 |   |      |   |     |
| Endocrine disorders                          | 7  | 0.6 | 0.2  | 7  | 100  | 2.5  |   |      |   |     |
| Other                                        | 11 | 0.9 | 4    | 11 | 100  | 3.9  |   |      |   |     |

Legend:

\* The total number of birth defects is greater than the total number of affected births because some had more than one major CA.

§ Severe congenital heart disease (EUROCAT definition): common arterial trunk (Q200), double outlet right ventricle (Q201), transposition of great arteries (Q203), single ventricle (Q204), atrioventricular septal defect (AVSD) (Q212), tetralogy of Fallot (Q213), pulmonary valve atresia (Q220), Ebstein anomaly (Q225), hypoplastic right heart (Q226), aortic valve atresia and stenosis (Q230), mitral valve anomalies (Q232, Q233), hypoplastic left heart (Q234), coarctation of the aorta (Q251), aortic atresia / interrupted aortic arch (Q252), total anomalous pulmonary venous return (Q262).



Legend: Table 3 Common single congenital anomalies (CA) per body system involved

| Body system      | Total number Of CA | Isolated CA |      | Common isolated anomalies                                                                                                                                          |
|------------------|--------------------|-------------|------|--------------------------------------------------------------------------------------------------------------------------------------------------------------------|
|                  |                    | No.         | %    |                                                                                                                                                                    |
| Cardiovascular   | 424                | 265         | 62.5 | ventricular septal defects in 75 (28.3%).<br>Atrial septal defects in 67 (25.3%).<br>Pulmonary valve atresia and stenosis in 18 (6.8%).<br>Sever CHD in 54 (20.4%) |
| Urinary          | 323                | 229         | 70.8 | Congenital hydronephrosis in 147 (64.2%).<br>Bilateral renal agenesis in 3 (1.3%).                                                                                 |
| Central nervous  | 161                | 68          | 42.8 | Neural tube defects in 32 (47.1%).<br>Encephalocele in 4 (5.9%)                                                                                                    |
| Gastrointestinal | 74                 | 33          | 44.6 | Ano-rectal atresia and stenosis in 16 (48.5%).<br>Diaphragmatic hernia in 6 (18.2).                                                                                |
| Limb             | 97                 | 31          | 32   | Total limbs reduction in 9 (29%).<br>Upper limb reduction in 7 (22.6%).<br>Lower limb reduction in 3 (9.7%).                                                       |
| Eye              | 32                 | 14          | 43.8 | Congenital glaucoma in 6 (42.9%).<br>Congenital cataract in 4 (28.6%).                                                                                             |

|  |  |  |  |                                             |
|--|--|--|--|---------------------------------------------|
|  |  |  |  | Anophthalmia + microphthalmia in 3 (21.4%). |
|--|--|--|--|---------------------------------------------|

Legend: Table 4 Distribution of parental socio-demographic characteristics and association with congenital anomaly risk (univariate analysis).

| Variable             | Cases<br>(total n=1179) |      | Controls<br>(total n=1262) |      | Odds<br>Ratio <sup>†</sup> | 95% CI |       |  |
|----------------------|-------------------------|------|----------------------------|------|----------------------------|--------|-------|--|
|                      | No.                     | %    | No.                        | %    |                            | Lower  | Upper |  |
| Consanguinity        |                         |      |                            |      |                            |        |       |  |
| Non-consanguineous   | 537                     | 45.5 | 693                        | 54.9 | Ref                        | -      | -     |  |
| Consanguineous       | 642                     | 54.5 | 569                        | 45.1 | 1.53                       | 1.30   | 1.8   |  |
| Maternal age (years) |                         |      |                            |      |                            |        |       |  |
| <20                  | 24                      | 2.0  | 48                         | 3.8  | 0.58                       | 0.35   | 0.96  |  |
| 20-30                | 599                     | 50.8 | 694                        | 55.0 | Ref                        | -      | -     |  |
| 31-40                | 473                     | 40.1 | 474                        | 37.6 | 1.16                       | 0.98   | 1.37  |  |
| >40                  | 83                      | 7.0  | 46                         | 3.6  | 2.09                       | 1.43   | 3.05  |  |
| Paternal age (years) |                         |      |                            |      |                            |        |       |  |
| 20-30                | 341                     | 28.9 | 403                        | 31.9 | 0.92                       | 0.76   | 1.10  |  |
| 31-40                | 548                     | 46.5 | 593                        | 47.0 | Ref                        | -      | -     |  |
| 41-50                | 240                     | 20.4 | 225                        | 17.8 | 1.15                       | 0.93   | 1.43  |  |
| > 50                 | 50                      | 4.2  | 41                         | 3.2  | 1.32                       | 0.86   | 2.03  |  |

|                                            |     |      |     |      |      |      |      |
|--------------------------------------------|-----|------|-----|------|------|------|------|
| Maternal body mass index <sup>‡</sup>      |     |      |     |      |      |      |      |
| <18.5                                      | 24  | 2.1  | 35  | 2.8  | 0.75 | 0.44 | 1.29 |
| 18.5-24.99                                 | 324 | 27.8 | 388 | 30.8 | 0.91 | 0.74 | 1.12 |
| 25.0-29.99                                 | 352 | 30.2 | 385 | 30.5 | Ref  | -    | -    |
| ≥30                                        | 464 | 39.9 | 453 | 35.9 | 1.12 | 0.92 | 1.36 |
| Previous deliveries (parity)               |     |      |     |      |      |      |      |
| Nulliparous                                | 216 | 18.3 | 273 | 21.6 | 0.92 | 0.74 | 1.16 |
| Para 1-2                                   | 374 | 31.7 | 436 | 34.5 | Ref  | -    | -    |
| Para 3-4                                   | 283 | 24.0 | 273 | 21.6 | 1.21 | 0.97 | 1.50 |
| Para ≥5                                    | 306 | 26.0 | 280 | 22.2 | 1.27 | 1.03 | 1.58 |
| Family monthly income Saudi riyals (US \$) |     |      |     |      |      |      |      |
| <3,000 SR (<800\$)                         | 19  | 1.9  | 12  | 1.0  | 1.87 | 0.89 | 3.92 |
| 10,000-14,000 SR (2667-3999\$)             | 235 | 23.2 | 277 | 22.3 | Ref  | -    | -    |
| 3,000-6,999 SR (800-1866\$)                | 232 | 22.9 | 291 | 23.4 | 0.94 | 0.74 | 1.20 |
| 7,000-9,999 SR (1867-2666\$)               | 367 | 36.3 | 496 | 39.9 | 0.87 | 0.70 | 1.09 |
| ≥15, 000 (≥4000\$)                         | 158 | 15.6 | 167 | 13.4 | 1.12 | 0.84 | 1.47 |
| Maternal education                         |     |      |     |      |      |      |      |
| Illiterate                                 | 391 | 33.2 | 333 | 26.4 | 1.50 | 1.26 | 1.80 |
| Schooling up to high school                | 671 | 56.9 | 859 | 68.1 | Ref  | -    | -    |
| University                                 | 117 | 9.9  | 70  | 5.5  | 2.05 | 1.49 | 2.81 |
| Folic acid intake                          |     |      |     |      |      |      |      |
| Periconceptual                             | 109 | 9.2  | 128 | 10.1 | Ref  | -    | -    |

|                                                           |      |      |      |      |      |      |      |
|-----------------------------------------------------------|------|------|------|------|------|------|------|
| Improper use <sup>§</sup>                                 | 1070 | 90.8 | 1134 | 89.9 | 1.04 | 0.79 | 1.36 |
| Parental Smoking                                          |      |      |      |      |      |      |      |
| Neither parent smoked                                     | 837  | 71.0 | 888  | 70.4 | Ref  | -    | -    |
| One or both parents smoked                                | 342  | 29.0 | 374  | 29.6 | 0.97 | 0.82 | 1.16 |
| Radiation exposure in pregnancy                           |      |      |      |      |      |      |      |
| None                                                      | 1161 | 98.5 | 1254 | 99.4 | Ref  | -    | -    |
| Radiation exposure in pregnancy                           | 18   | 1.5  | 8    | 0.6  | 2.43 | 1.05 | 5.61 |
| Diabetes mellitus (DM)                                    |      |      |      |      |      |      |      |
| No DM                                                     | 956  | 81.1 | 1062 | 84.2 | Ref  | -    | -    |
| DM on insulin (all, overt & gestational)                  | 86   | 7.3  | 41   | 3.2  | 2.34 | 1.60 | 3.43 |
| Gestational DM on diet only                               | 137  | 11.6 | 157  | 12.6 | 0.91 | 0.62 | 1.16 |
| Sibs of cases and controls (primiparous mothers excluded) |      |      |      |      |      |      |      |
| No affected sibling                                       | 757  | 78.6 | 932  | 94.2 | Ref- | -    | -    |
| Sibling with CA                                           | 85   | 8.8  | 58   | 5.7  | 1.61 | 1.14 | 2.27 |
| Medication use in pregnancy                               |      |      |      |      |      |      |      |
| None                                                      | 792  | 67.2 | 951  | 75.3 | -    | -    | -    |
| Thyroxin                                                  | 102  | 8.7  | 106  | 8.4  | 1.03 | 0.78 | 1.37 |
| Insulin                                                   | 86   | 7.3  | 40   | 3.2  | 2.34 | 1.59 | 3.45 |
| Methyldopa                                                | 14   | 1.2  | 14   | 1.1  | 1.07 | 0.51 | 2.26 |

| Maternal systemic illnesses         |     |      |     |      |      |      |      |
|-------------------------------------|-----|------|-----|------|------|------|------|
| None                                | 808 | 68.5 | 971 | 76.9 | Ref- | -    | -    |
| Mothers with Hypothyroidism         | 123 | 10.4 | 128 | 10.1 | 1.03 | 0.80 | 1.34 |
| Mothers with Bronchial asthma       | 106 | 9.0  | 97  | 7.7  | 1.19 | 0.89 | 1.58 |
| Mothers with depression             | 12  | 1.0  | 6   | 0.5  | 2.15 | 0.81 | 5.75 |
| Mothers with essential hypertension | 23  | 2.0  | 15  | 1.2  | 1.65 | 0.86 | 3.19 |

Footnote:

‡BMI not available for 15 mothers

Some families declined reporting their income.

§Improper-use includes FA taken post conception and 49 mothers (43 case mothers and 6 control mothers) who were not sure about their intake.

Legend: Table 5 multiple logistic regression model results for the significant risk factors on univariate analysis

| Variable                                                | ADJUSTED OR<br>(from multiple<br>logistic regression<br>model) † |          |       | CRUDE OR (from<br>univariate analysis) |          |       |
|---------------------------------------------------------|------------------------------------------------------------------|----------|-------|----------------------------------------|----------|-------|
|                                                         | OR                                                               | 95% C.I. |       | OR                                     | 95% C.I. |       |
|                                                         |                                                                  | Lower    | Upper |                                        | Lower    | Upper |
| Consanguinity, none (reference group)                   | -                                                                | -        | -     | -                                      | -        | -     |
| Consanguinity, first degree                             | 1.5<br>2                                                         | 1.28     | 1.81  | 1.5<br>3                               | 1.30     | 1.81  |
| Maternal age, 20-30 years (reference group)             | -                                                                | -        | -     | -                                      | -        | -     |
| Maternal age, <20 years                                 | 0.5<br>4                                                         | 0.32     | 0.91  | 0.5<br>8                               | 0.35     | 0.96  |
| Maternal age, >40 years                                 | 2.1<br>1                                                         | 1.35     | 3.30  | 2.0<br>9                               | 1.43     | 3.05  |
| Maternal education, up to high school (reference group) | -                                                                | -        | -     | -                                      | -        | -     |
| Maternal education, illiterate                          | 1.4<br>1                                                         | 1.17     | 1.70  | 1.5<br>0                               | 1.26     | 1.80  |
| Maternal education, university                          | 1.7<br>4                                                         | 1.24     | 2.44  | 2.0<br>5                               | 1.49     | 2.81  |
| Diabetes on insulin, overt or gestational (yes/no)      | 1.9<br>8                                                         | 1.33     | 2.95  | 2.3<br>4                               | 1.60     | 3.43  |
| Sibling with anomalies (yes/no)                         | 1.4<br>9                                                         | 1.04     | 2.12  | 1.6<br>1                               | 1.14     | 2.27  |

1  
2  
3  
4  
5  
6 †: Adjustment for consanguinity, maternal age, maternal education, diabetes  
7  
8 mellitus, sibling with anomalies.  
9  
10  
11  
12  
13  
14  
15  
16  
17

18 **Figures legend:**

19  
20  
21  
22 Legend: Figure \_1 Catchment site and the study flow chart.  
23  
24

25 Legend: Figure \_2 Study population and distribution of pregnancies and their  
26  
27 outcomes.  
28  
29

30 Legend: Figure \_ 3 Frequency among control subjects of selected risk factors for CA.  
31  
32  
33  
34  
35  
36  
37  
38  
39  
40  
41  
42  
43  
44  
45  
46  
47  
48  
49  
50  
51  
52  
53  
54  
55  
56  
57  
58  
59  
60

Figure 1- Catchment site and the study flow chart.

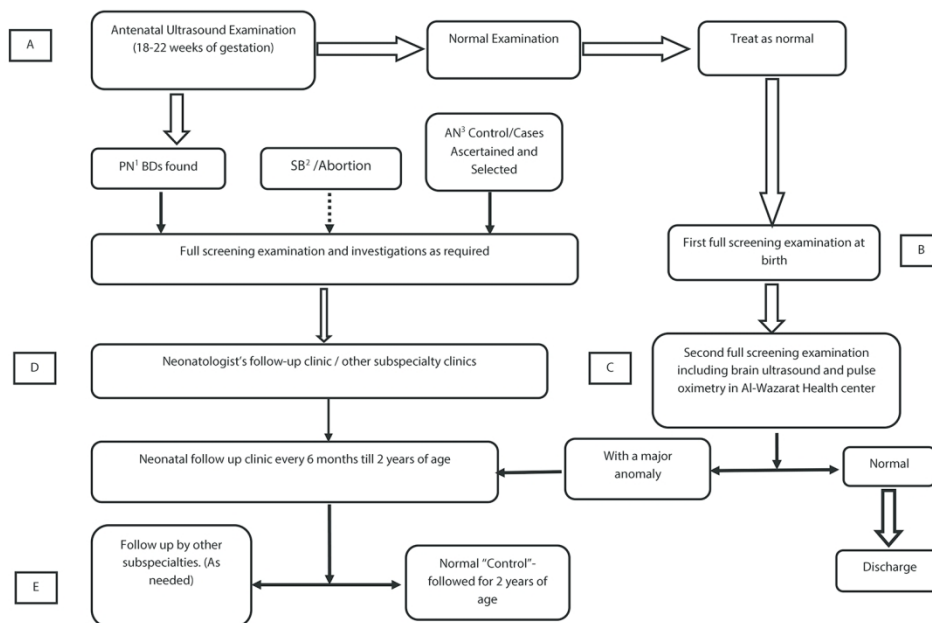

Legend: Case catchment areas (A to E). A: antenatal clinic, B: at birth, C: the "one-month clinic, D: geneticist "one-month clinic", and E: other areas. 1,2,3 are postnatal, stillbirth and antenatal respectively. BD, Birth defect

Legend: Figure \_1 Catchment site and the study flow chart.

150x120mm (300 x 300 DPI)



1  
2  
3  
4  
5  
6  
7  
8  
9  
10  
11  
12  
13  
14  
15  
16  
17  
18  
19  
20  
21  
22  
23  
24  
25  
26  
27  
28  
29  
30  
31  
32  
33  
34  
35  
36  
37  
38  
39  
40  
41  
42  
43  
44  
45  
46  
47  
48  
49  
50  
51  
52  
53  
54  
55  
56  
57  
58  
59  
60

Figure\_2 Study population and distribution of pregnancies and their outcomes.

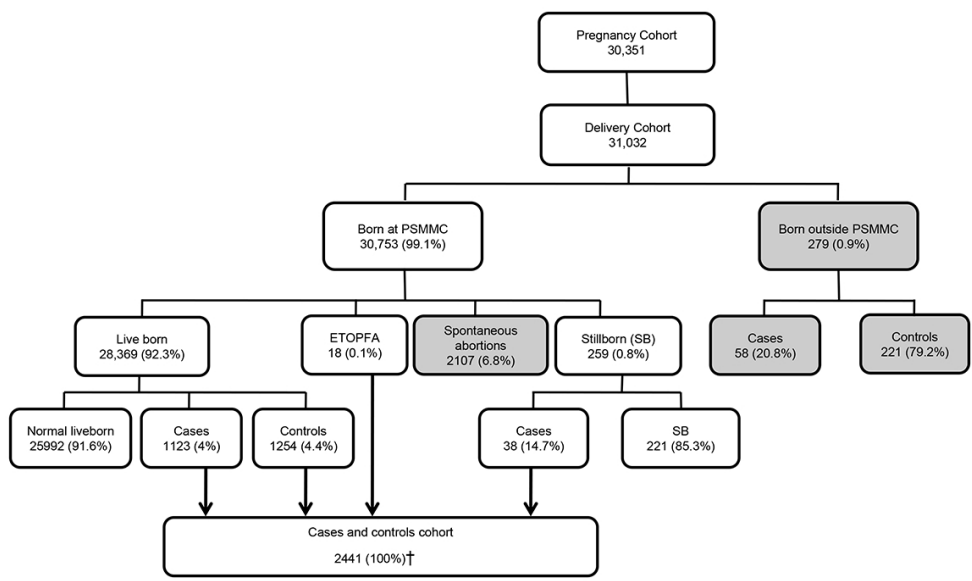

Legend:

PSMMC, Prince Sultan Military Medical City; ETOPFA, Elective termination of pregnancy for foetal anomaly.

†Eight control foetuses were stillbirth.

Figure 3. Frequency among control subjects of selected risk factors for birth defects.

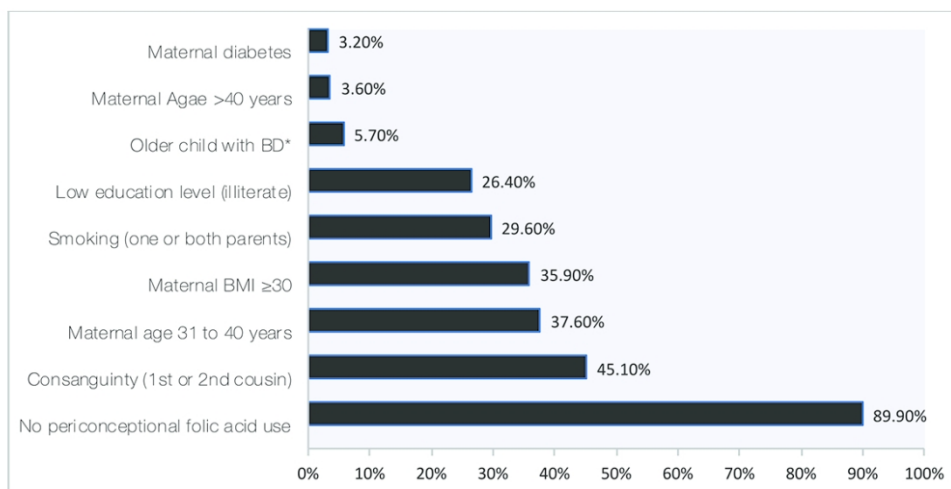

Legend:

BMI, pre-pregnancy maternal body mass index

BD, birth defect

\*Frequency of prior child with BD computed among non-primiparous women

Legend: Figure \_ 3 Frequency among control subjects of selected risk factors for birth defects.

99x79mm (300 x 300 DPI)

Supplement file

Appendix

Confidential

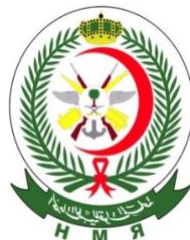

PSMMC

Booklet of

**“Pattern of Fetal Malformations in a Saudi Population”**

Study

Control

Local ID No.: \_\_\_\_\_ / Year 201

Mother’s Name:

\_\_\_\_\_

Mother’s MRN:

\_\_\_\_\_

Baby’s Name:

\_\_\_\_\_

Baby’s MRN:

\_\_\_\_\_

Date of Birth:

\_\_\_\_\_ / \_\_\_\_\_ / \_\_\_\_\_

Contact No: Mobile (husband)

\_\_\_\_\_

Mobile (wife)

\_\_\_\_\_

Home

\_\_\_\_\_

Confidential

Keep in a safe place

**Pattern of Malformations Study – PSMMC**

(Baby and mother)

Local ID No \_\_\_\_\_

D.O.B. (dd/mm/yy): \_\_\_\_/\_\_\_\_/\_\_\_\_ Year: 201\_\_

D. O. B./ Year Unknown Sex: Male  Female  indeterminate  Not known 

No. of babies delivered: Singleton 1  Twin 2  Triplet 3  Quadruplet 4   
 Quintuplet 5  Sextuplet 6   
 Not known 9

Specify twin type of birth, like or unlike sex, zygosity: \_\_\_\_\_

No. of malformed (in multiple set): No. \_\_\_\_\_ Not known Type of birth: Live Birth (LB).  Still Birth (SB)  Spontaneous Abortion TOP  Not known Civil registration status LB  SB  No CR  Not known Birth weight (g): \_\_\_\_\_ Confirmed Length of gestation (weeks): \_\_\_\_\_ Confirmed 

Survival beyond one week of age:

Yes  No  Alive at discharge <1 Week  Not known 

Date of death (dd/mm/yy): \_\_\_\_/\_\_\_\_/\_\_\_\_ Year: \_\_\_\_\_

D. O. B. Mother (dd/mm/yy): \_\_\_\_/\_\_\_\_/\_\_\_\_ Year: \_\_\_\_\_ Confirmed 

Age of mother at delivery: \_\_\_\_\_

1  
2  
3 **Pattern of Malformations Study – RMH**

4  
5 (Baby and mother)

6  
7 **Local ID No** \_\_\_\_\_

8  
9 **Mother's residence code at conception:** Province \_\_\_\_\_ District \_\_\_\_\_

10  
11 Mother's residence code at delivery: Province \_\_\_\_\_ District \_\_\_\_\_

12  
13 **Total No. of previous pregnancies:** None  Number ( \_\_\_ )  Not known

14  
15 **When discovered:**

16  
17 At birth  Less than 1 wk  1-4 wk  1-12 m  >12 m  Prenatal diagnosis

18  
19 At abortion (sp) or termination  Not known  Postnatal diagnosis, age not known

20  
21 **Condition at discovery:** Alive  Dead  Not known

22  
23 **Gestational age at discovery (wk):** \_\_\_\_\_

24  
25 **First positive prenatal test:**

26  
27 US at <14 wks  US at 14-21 wks  US at ≥ 22 wk  US GA unknown   
28 Serum/combined screening  CVS  Amniocentesis  Other tests positive

29  
30 No positive test, all results negative

31  
32 **Specify 'other' prenatal test:** \_\_\_\_\_

33  
34 **Karyotype of infant/ fetus:**

35  
36 Performed, result known  Performed, result unknown

37  
38 Not performed  Probe test performed  Failed  Not known

39  
40 **Specify karyotype:** \_\_\_\_\_

41  
42 **Post mortem exam:**

43  
44 Performed, result known  Performed, result unknown

45  
46 Macerated fetus  Not known  Not performed

47  
48 **First surgical procedure:**

49  
50 Performed (or expected) in the first year of life

51  
52 Performed (or expected) after the first year of life

53  
54 Prenatal surgery  No surgery required

55  
56 Too sever for surgery  Not known

**Pattern of Malformations Study – PSMMC**

(Prenatal Malformations)

Local ID No \_\_\_\_\_

**Code                      Text**

|                        |  |  |
|------------------------|--|--|
| <b>Syndrome:</b>       |  |  |
| <b>Malformation 1:</b> |  |  |
| <b>Malformation 2:</b> |  |  |
| <b>Malformation 3:</b> |  |  |
| <b>Malformation 4:</b> |  |  |
| <b>Malformation 5:</b> |  |  |
| <b>Malformation 6:</b> |  |  |
| <b>Malformation 7:</b> |  |  |
| <b>Malformation 8:</b> |  |  |

1  
2  
3 **Pattern of Malformations Study – RMH**

4  
5 (All Malformations)

6  
7 Local ID No \_\_\_\_\_

8  
9

|    | Code                   | Text |
|----|------------------------|------|
| 11 | <b>Syndrome:</b>       |      |
| 12 |                        |      |
| 13 | <b>Malformation 1:</b> |      |
| 14 |                        |      |
| 15 | <b>Malformation 2:</b> |      |
| 16 |                        |      |
| 17 | <b>Malformation 3:</b> |      |
| 18 |                        |      |
| 19 | <b>Malformation 4:</b> |      |
| 20 |                        |      |
| 21 | <b>Malformation 5:</b> |      |
| 22 |                        |      |
| 23 | <b>Malformation 6:</b> |      |
| 24 |                        |      |
| 25 | <b>Malformation 7:</b> |      |
| 26 |                        |      |
| 27 | <b>Malformation 8:</b> |      |
| 28 |                        |      |

29

30  
31 **McKusick code:** \_\_\_\_\_

32  
33 **Aetiology:**

34  
35 Chromosome **C**  Familial **F**  Isolated **I**  Multiple **M**

36  
37 New Dominant **ND**  Other Genomic **OG**  Syndrome **S**  Teratogens **T**  Inborn

38  
39 Error of Metabolism **IEM**  Control **Co**

40  
41  
42  
43

44 **View anomaly subgroup(s):**

45  
46  
47  
48  
49  
50  
51  
52  
53  
54  
55  
56  
57  
58  
59  
60

**Pattern of Malformations Study – RMH**

Local ID No \_\_\_\_\_

**Assisted conception:** No  Induced ovulation only  Artificial insemination   
 In vitro fertilization  Gamete intrafollopian transfer   
 Intracytoplasmic sperm injection  Egg donation  Other   
 Not known

**Mother's occupation:** House wife  Teacher  Student  Other

**Maternal Systemic illnesses;**

None  EHT  Hypothyroidism  CHD   
 RHD  CRF  Asthma  SCA  SLE   
 IDA  Anxiety  Depression  Epilepsy   
 Other  (specify) \_\_\_\_\_

**Weight before pregnancy (Kg)** \_\_\_\_\_

**Current weight (Kg)** \_\_\_\_\_

**Mother's height (m)** \_\_\_\_\_

**Body Mass Index:** <18.5  18.5 – 24.9  25 – 29.9   
 30.0 – 34.9  35.0 – 39.9  ≥ 40.0

**True DM:** Yes  No

**Gestational DM on Diet (GDOD)**

**Gestational DM on Insulin (GDOI)**

**Diabetes screening:** GTT (result) 0 time: \_\_\_\_\_ 1hour: \_\_\_\_\_ 2 hours: \_\_\_\_\_

Booking RBS: \_\_\_\_\_

**HbA1c** \_\_\_\_\_



**Infectious disease:**

Tuberculosis: Before pregnancy  During pregnancy  1<sup>st</sup> T  2<sup>nd</sup> T  3<sup>rd</sup> T

Rubella Before pregnancy  During pregnancy  1<sup>st</sup> T  2<sup>nd</sup> T  3<sup>rd</sup> T

CMV Before pregnancy  During pregnancy  1<sup>st</sup> T  2<sup>nd</sup> T  3<sup>rd</sup> T

Toxoplasmosis Before pregnancy  During pregnancy  1<sup>st</sup> T  2<sup>nd</sup> T  3<sup>rd</sup> T

Syphilis Before pregnancy  During pregnancy  1<sup>st</sup> T  2<sup>nd</sup> T  3<sup>rd</sup> T

UTI Before pregnancy  During pregnancy  1<sup>st</sup> T  2<sup>nd</sup> T  3<sup>rd</sup> T

Fever Before pregnancy  During pregnancy  1<sup>st</sup> T  2<sup>nd</sup> T  3<sup>rd</sup> T

FLU Before pregnancy  During pregnancy  1<sup>st</sup> T  2<sup>nd</sup> T  3<sup>rd</sup> T

Others Before pregnancy  During pregnancy  1<sup>st</sup> T  2<sup>nd</sup> T  3<sup>rd</sup> T

(Specify others) \_\_\_\_\_

**Previous surgical history:** Obstetrical/Gynaecological

Specify; \_\_\_\_\_

Non Obstetrical

Specify; \_\_\_\_\_

1  
2  
3  
4  
5  
6  
7  
8  
9  
10  
11  
12  
13  
14  
15  
16  
17  
18  
19  
20  
21  
22  
23  
24  
25  
26  
27  
28  
29  
30  
31  
32  
33  
34  
35  
36  
37  
38  
39  
40  
41  
42  
43  
44  
45  
46  
47  
48  
49  
50  
51  
52  
53  
54  
55  
56  
57  
58  
59  
60

## Pattern of Malformations Study – PSMMC

### Family history & sociodemographic

Local ID No \_\_\_\_\_

#### Folic acid supplementation:

At least 0.4 mg folic acid supplement taken regularly, starting periconceptionally

Folic acid supplement taken irregularly or starting post-conceptionally

No folic acid supplement taken or not recorded

#### ATC code

Text (**only** drugs taken in the 1<sup>st</sup> trimester of pregnancy)

|          |  |  |
|----------|--|--|
| Drugs 1: |  |  |
| Drugs 2: |  |  |
| Drugs 3: |  |  |
| Drugs 4: |  |  |
| Drugs 5: |  |  |

**Consanguinity:** Not related or relationship more distant than second cousin

Relationship of second cousin or closer  Not known

#### Specific information on consanguinity:

\_\_\_\_\_

**Sibs with anomalies:** Same  Other  Same and other  No  Not known

**Previous sibs notified to the Saudi Malformations Registry:** Yes  No  Not known

**Local ID of previous sibs notified to the SMR (1):** \_\_\_\_\_

**Local ID of previous sibs notified to the SMR (2):** \_\_\_\_\_

**Local ID of previous sibs notified to the SMR (3):** \_\_\_\_\_

**Mother's family with anomalies:** Same  Other  Same and other  No

Not known  Specify \_\_\_\_\_

1  
2  
3  
4  
5  
6  
7  
8  
9  
10  
11  
12  
13  
14  
15  
16  
17  
18  
19  
20  
21  
22  
23  
24  
25  
26  
27  
28  
29  
30  
31  
32  
33  
34  
35  
36  
37  
38  
39  
40  
41  
42  
43  
44  
45  
46  
47  
48  
49  
50  
51  
52  
53  
54  
55  
56  
57  
58  
59  
60

**Father’s family with anomalies:** Same  Other  Same and other  No

Not known  Specify \_\_\_\_\_

**Maternal education:** Illiterate  Elementary and lower secondary

Upper secondary  Tertiary  Not known

**Family monthly income (SR):** \_\_\_\_\_

**(husband or combined husband and wife income)**

**Nationality:** Saudi  None Saudi  Only father Saudi  Only mother Saudi

**General additional comments:**

\_\_\_\_\_

\_\_\_\_\_

1  
2  
3  
4  
5  
6  
7  
8 **Pattern of Malformations Study – PSMMC**

9 Local Vars. (1)

10  
11  
12 **Local ID No** \_\_\_\_\_

13  
14 **Place of birth:** \_\_\_\_\_

15  
16 **Birth order (in multiple set),** (please write as 1<sup>st</sup>, 2<sup>nd</sup>, 3<sup>rd</sup> and so on): \_\_\_\_\_

17  
18 **Date of discovery (dd/mm/yy):** \_\_\_\_/\_\_\_\_/\_\_\_\_ **Year:** \_\_\_\_\_

19  
20 **Amniocentesis:** Performed result positive  Performed result not known

21  
22 Not performed  Performed result negative  Failed  Not known

23  
24 **Ultrasound:** Performed result positive  Performed result not known

25  
26 Not performed  Performed result negative  Failed  Not known

27  
28 **Chorionic villous sampling:** \_\_\_\_\_

29  
30 **Other techniques:**

31  
32 Performed result positive  Performed result not known  Not performed

33  
34 Performed result negative  Failed  Not known

35  
36  
37  
38 **Specify other technique for prenatal diagnosis:** \_\_\_\_\_

39  
40  
41 (Cordocentesis,..etc)

42  
43 **No. of previous spontaneous abortions:** None  1  2  3  4

44  
45 5  6  7  8+  Not known

46  
47 **No. of previous TOP:** None  1  2  3  4  5

48  
49 6  7  8+  Not known

50  
51 **No. of previous live births:** please write the exact No (1-20) \_\_\_\_\_ Unknown

52  
53 **No. of previous stillbirths:** None  1  2  3  4

54  
55 5  6  7  8+  Not known

56  
57 **Mode of transmission:** Familial  De novo  Not known

**Habitual exposures:** Smoking F179  Oude F159   
 Other (specify) \_\_\_\_\_

**Unusual exposures:** X-ray during pregnancy (any)  Nuclear medicine during pregnancy   
 (Radiation & chemical)

**Date of birth of father:** \_\_\_\_/\_\_\_\_/\_\_\_\_ **Year:** \_\_\_\_\_ **Age of father:** \_\_\_\_\_

**Occupation of father:** Soldier  Officer  Civilian

### Pattern of Malformations Study – RMH

Local Vars. (2)

Local ID No \_\_\_\_\_

**Date of last LMP:** \_\_\_\_/\_\_\_\_/\_\_\_\_

**Certainty of LMP:** Certain  Uncertain  No LMP  Not known

**Labor:** Spontaneous  Induced  No labor

**Delivery:** Spontaneous  EMLSCS  ELSCS  ABD   
 Instrumental

#### Sources of information 1:

Notes in routine scan  Birth notification or notification of malformation at birth

Hospital case notes  Death or stillbirth certificate  Prenatal diagnosis

Lab. report (cytogenetic ... etc)  Postmortem exam  Other  Not known

**Sources of information 2:** please insert as in one \_\_\_\_\_

**Sources of information 3:** please insert as in one \_\_\_\_\_

**Sources of information 4:** please insert as in one \_\_\_\_\_

**Sources of information 5:** please insert as in one \_\_\_\_\_

**Racial information** Mother, Tribe code \_\_\_\_\_ Father, Tribe code \_\_\_\_\_

Same tribe  Different tribe

Otaibi 1, Mutairi 2, Shuhri 3, Asiri 4, Shamrani 5, Onazi 6, Shahrani 7, Zaharani 8, Harbi 9, Qahatni 10, Ghamdi 11, Shamari 12, Asmari 13, Ahmari 14, Amri 15, Dawsari 16, Harthi 17, Subaie 18, Ajman 19, Not known (99)

Other 20, specify: \_\_\_\_\_

**Chronic illness of father (including drug abuse):** \_\_\_\_\_

**Confirmation of diagnosis:**

Follow up needed for further confirmation  Confirmed at <6 months   
Confirmed at 6-12 m  Confirmed at 12-18 m  Confirmed at 18-24 m   
Not confirmed, lost for follow up

**Source:** Booked  Un booked  Referred

## Checklist

**STROBE Statement**—checklist of items that should be included in reports of observational studies

|                      | Item No. | Recommendation                                                                                      | Page No. | Relevant text from manuscript                                                                                                                                                                                                                                                                                                                                                                                                                                                                                                    |
|----------------------|----------|-----------------------------------------------------------------------------------------------------|----------|----------------------------------------------------------------------------------------------------------------------------------------------------------------------------------------------------------------------------------------------------------------------------------------------------------------------------------------------------------------------------------------------------------------------------------------------------------------------------------------------------------------------------------|
| Title and abstract   | 1        | (a) Indicate the study's design with a commonly used term in the title or the abstract              | 1        | Observational, prospective cohort design with a nested case-control study                                                                                                                                                                                                                                                                                                                                                                                                                                                        |
|                      |          | (b) Provide in the abstract an informative and balanced summary of what was done and what was found | 2        | Abstract<br>Of the 28 646 eligible pregnancy outcomes, 1179 were diagnosed with a CA, for an overall prevalence of 412/10000 total births, or 1 in 24 births.                                                                                                                                                                                                                                                                                                                                                                    |
| <b>Introduction</b>  |          |                                                                                                     |          |                                                                                                                                                                                                                                                                                                                                                                                                                                                                                                                                  |
| Background/rationale | 2        | Explain the scientific background and rationale for the investigation being reported                | 4        | Congenital anomalies(CA) are increasingly recognized as a global health priority because of their lifelong impact on health and survival. <sup>1,2</sup><br><br>CA affect approximately an estimated 1 in 33 newborns, contribute each year to 300,000 deaths in the first month of life, and are associated with 3·2 million birth-related disabilities. <sup>3</sup> Accordingly, the World Health Assembly has emphasized the urgent need for action to help prevent, diagnose, and provide timely intervention. <sup>1</sup> |
| Objectives           | 3        | State specific objectives, including any prespecified hypotheses                                    | 4,5      | In this study, we implemented an integrated approach to generate these data in well-defined cohort of women, tracked from mid-gestation through the second year of life of their children, to assess concurrently the burden of potentially modifiable risk factors, the occurrence of CA, and survival of affected children, as a basis for better prevention and care. <sup>4</sup>                                                                                                                                            |
| <b>Methods</b>       |          |                                                                                                     |          |                                                                                                                                                                                                                                                                                                                                                                                                                                                                                                                                  |
| Study design         | 4        | Present key elements of study design early in the paper                                             | 5        | Observational, prospective cohort design with a nested case-control study.                                                                                                                                                                                                                                                                                                                                                                                                                                                       |





|                              |    |                                                                                                                                                                                                                                                                                                                   |      |                                                                                                                                                                                                                                                                                                                                                |
|------------------------------|----|-------------------------------------------------------------------------------------------------------------------------------------------------------------------------------------------------------------------------------------------------------------------------------------------------------------------|------|------------------------------------------------------------------------------------------------------------------------------------------------------------------------------------------------------------------------------------------------------------------------------------------------------------------------------------------------|
| Data sources/<br>measurement | 8* | For each variable of interest, give sources of data and details of methods of assessment (measurement). Describe comparability of assessment methods if there is more than one group                                                                                                                              |      | n/a                                                                                                                                                                                                                                                                                                                                            |
| Bias                         | 9  | Describe any efforts to address potential sources of bias                                                                                                                                                                                                                                                         | 5,6  | Pregnancies referred from other hospitals because of a diagnosis of a foetal anomaly, and babies with CA delivered elsewhere and referred to PSMHC for evaluation and management                                                                                                                                                               |
| Study size                   | 10 | Explain how the study size was arrived at                                                                                                                                                                                                                                                                         | 5    | All mother delivered at PSMHC during the study period were included                                                                                                                                                                                                                                                                            |
| Quantitative variables       | 11 | Explain how quantitative variables were handled in the analyses. If applicable, describe which groupings were chosen and why                                                                                                                                                                                      |      |                                                                                                                                                                                                                                                                                                                                                |
| Statistical methods          | 12 | (a) Describe all statistical methods, including those used to control for confounding                                                                                                                                                                                                                             | 9,10 | Odd ratios for CA were computed first via univariate logistic regression, then with a multiple logistic model. The latter was developed by first including uncorrelated significant factors ( $p < 0.05$ ) from the univariate analysis, then reducing the number of variables by stepwise backward elimination for a more parsimonious model. |
|                              |    | (b) Describe any methods used to examine subgroups and interactions                                                                                                                                                                                                                                               |      | n/a                                                                                                                                                                                                                                                                                                                                            |
|                              |    | (c) Explain how missing data were addressed                                                                                                                                                                                                                                                                       |      |                                                                                                                                                                                                                                                                                                                                                |
|                              |    | (d) <i>Cohort study</i> —If applicable, explain how loss to follow-up was addressed<br><br><i>Case-control study</i> —If applicable, explain how matching of cases and controls was addressed<br><br><i>Cross-sectional study</i> —If applicable, describe analytical methods taking account of sampling strategy | 7    | n/a<br>randomization<br><br>n/a                                                                                                                                                                                                                                                                                                                |

|                  |     |                                                                                                                                                                                                   |         |                                                                                                                                                                                                                                                                            |
|------------------|-----|---------------------------------------------------------------------------------------------------------------------------------------------------------------------------------------------------|---------|----------------------------------------------------------------------------------------------------------------------------------------------------------------------------------------------------------------------------------------------------------------------------|
|                  |     | (e) Describe any sensitivity analyses                                                                                                                                                             |         | n/a                                                                                                                                                                                                                                                                        |
| <b>Results</b>   |     |                                                                                                                                                                                                   |         |                                                                                                                                                                                                                                                                            |
| Participants     | 13* | (a) Report numbers of individuals at each stage of study—eg numbers potentially eligible, examined for eligibility, confirmed eligible, included in the study, completing follow-up, and analysed | 9 -11   | All mothers and their offspring were included. For details see Figure 2.                                                                                                                                                                                                   |
|                  |     | (b) Give reasons for non-participation at each stage                                                                                                                                              |         | n/a                                                                                                                                                                                                                                                                        |
|                  |     | (c) Consider use of a flow diagram                                                                                                                                                                |         |                                                                                                                                                                                                                                                                            |
| Descriptive data | 14* | (a) Give characteristics of study participants (eg demographic, clinical, social) and information on exposures and potential confounders                                                          | 29 - 32 | All demographic data were shown in Tables 4 and 5                                                                                                                                                                                                                          |
|                  |     | <i>Case-control study</i> —Report numbers in each exposure category, or summary measures of exposure                                                                                              |         |                                                                                                                                                                                                                                                                            |
|                  |     | <i>Cross-sectional study</i> —Report numbers of outcome events or summary measures                                                                                                                | 8       | 2 – 5 years. Follow up. Case-infants (with CA) and control-infants were examined in the dedicated study clinic at 1, 6, 12, 18 and 24 months of age                                                                                                                        |
| Outcome data     | 15* | <i>Cohort study</i> —Report numbers of outcome events or summary measures over time                                                                                                               |         |                                                                                                                                                                                                                                                                            |
|                  |     | <i>Case-control study</i> —Report numbers in each exposure category, or summary measures of exposure                                                                                              | 9       | 1179 as cases and 1262 as controls                                                                                                                                                                                                                                         |
|                  |     | <i>Cross-sectional study</i> —Report numbers of outcome events or summary measures                                                                                                                |         |                                                                                                                                                                                                                                                                            |
| Main results     | 16  | (a) Give unadjusted estimates and, if applicable, confounder-adjusted estimates and their precision (eg, 95% confidence interval). Make clear                                                     | 9-11    | Of the 28 646 eligible pregnancy outcomes, 1179 were diagnosed with a CA, for an overall prevalence of 412/10000 total births, or 1 in 24 births. Of these 1179 cases, 38 (3.2%) were stillbirths and 18 (1.5%) were electively terminated because of lethal malformations |

|                   |    |                                                                                                                                                                            |    |                                                                                                                                                                                                                                                                                                                                                                                                                                                                                                                                                                                |
|-------------------|----|----------------------------------------------------------------------------------------------------------------------------------------------------------------------------|----|--------------------------------------------------------------------------------------------------------------------------------------------------------------------------------------------------------------------------------------------------------------------------------------------------------------------------------------------------------------------------------------------------------------------------------------------------------------------------------------------------------------------------------------------------------------------------------|
|                   |    | which confounders were adjusted for and why they were included                                                                                                             |    | (13 with anencephaly, 3 with severe hydrops foetalis and cystic hygroma, 1 with Meckel-Gruber syndrome and 1 with bilateral renal agenesis). The antenatal detection rate among women who has had antenatal ultrasound screening examination was 70.6%(561/795), tables b 1,2,3                                                                                                                                                                                                                                                                                                |
|                   |    | (b) Report category boundaries when continuous variables were categorized                                                                                                  |    |                                                                                                                                                                                                                                                                                                                                                                                                                                                                                                                                                                                |
|                   |    | (c) If relevant, consider translating estimates of relative risk into absolute risk for a meaningful time period                                                           |    |                                                                                                                                                                                                                                                                                                                                                                                                                                                                                                                                                                                |
| Other analyses    | 17 | Report other analyses done—eg analyses of subgroups and interactions, and sensitivity analyses                                                                             |    | n/a                                                                                                                                                                                                                                                                                                                                                                                                                                                                                                                                                                            |
| <b>Discussion</b> |    |                                                                                                                                                                            |    |                                                                                                                                                                                                                                                                                                                                                                                                                                                                                                                                                                                |
| Key results       | 18 | Summarise key results with reference to study objectives                                                                                                                   | 2  | In this cohort of women, the burden of potentially modifiable risk factors included high rates of diabetes (7.3%), maternal age >40 years (7.0%), consanguinity (54.5%), and lack of periconceptional folic acid use (90.8%). The birth prevalence of CA was 41.2/1,000 births (1179 cases / 28646 live births and stillbirths), driven mainly by congenital heart disease (14.8 per 1000), renal malformations (11.3), neural tube defects (1.9), and chromosomal anomalies (2.7). Mortality for live births with CA at 1 and 2 years of age was 14% and 15.8%, respectively. |
| Limitations       | 19 | Discuss limitations of the study, taking into account sources of potential bias or imprecision. Discuss both direction and magnitude of any potential bias                 | 15 | Single centre study, Army personnel household only                                                                                                                                                                                                                                                                                                                                                                                                                                                                                                                             |
| Interpretation    | 20 | Give a cautious overall interpretation of results considering objectives, limitations, multiplicity of analyses, results from similar studies, and other relevant evidence | 15 | High prevalence of CA, multiple modifiable risk factors.                                                                                                                                                                                                                                                                                                                                                                                                                                                                                                                       |

|                          |    |                                                                                                                                                               |    |                                                                                                                                                                                                                             |
|--------------------------|----|---------------------------------------------------------------------------------------------------------------------------------------------------------------|----|-----------------------------------------------------------------------------------------------------------------------------------------------------------------------------------------------------------------------------|
| Generalizability         | 21 | Discuss the generalizability (external validity) of the study results                                                                                         | 15 | Since it's a single centre study, it should be generalized with caution as mentioned in the discussion.                                                                                                                     |
| <b>Other information</b> |    |                                                                                                                                                               |    |                                                                                                                                                                                                                             |
| Funding                  | 22 | Give the source of funding and the role of the funders for the present study and, if applicable, for the original study on which the present article is based | 2  | This project was supported by King Abdul-Aziz City for Science and Technology (KACST) through the National Science, Technology and Innovation Plan (NSTIP). Project No: 09-MED748-21. The funder has no role in this study. |

\*Give information separately for cases and controls in case-control studies and, if applicable, for exposed and unexposed groups in cohort and cross-sectional studies.

**Note:** An Explanation and Elaboration article discusses each checklist item and gives methodological background and published examples of transparent reporting. The STROBE checklist is best used in conjunction with this article (freely available on the Web sites of PLoS Medicine at <http://www.plosmedicine.org/>, Annals of Internal Medicine at <http://www.annals.org/>, and Epidemiology at <http://www.epidem.com/>). Information on the STROBE Initiative is available at [www.strobe-statement.org](http://www.strobe-statement.org).

# BMJ Open

## Congenital anomalies and associated risk factors in a Saudi population: a cohort study from pregnancy to age 2 years

|                                 |                                                                                                                                                                                                                                                                                                                                                                                                                                                       |
|---------------------------------|-------------------------------------------------------------------------------------------------------------------------------------------------------------------------------------------------------------------------------------------------------------------------------------------------------------------------------------------------------------------------------------------------------------------------------------------------------|
| Journal:                        | <i>BMJ Open</i>                                                                                                                                                                                                                                                                                                                                                                                                                                       |
| Manuscript ID                   | bmjopen-2018-026351.R2                                                                                                                                                                                                                                                                                                                                                                                                                                |
| Article Type:                   | Research                                                                                                                                                                                                                                                                                                                                                                                                                                              |
| Date Submitted by the Author:   | 19-May-2019                                                                                                                                                                                                                                                                                                                                                                                                                                           |
| Complete List of Authors:       | Kurdi, Ahmed; Prince Sultan Military Medical City, Majeed-Saidan, Muhammad Ali; Prince Sultan Military Medical City, Paediatrics<br>Al Rakaf, Maha; Prince Sultan Military Medical City, Obstetrics & Gynecology<br>AlHashem, Amal; Prince Sultan Military Medical City<br>Botto, Lorenzo; University of Utah, Pediatrics<br>Baaqeel, Hassan; King Saud bin Abdulaziz University for Health Sciences, College of Medicine<br>Ammari, Amer; Pediatrics |
| <b>Primary Subject Heading</b>: | Epidemiology                                                                                                                                                                                                                                                                                                                                                                                                                                          |
| Secondary Subject Heading:      | Obstetrics and gynaecology, Paediatrics                                                                                                                                                                                                                                                                                                                                                                                                               |
| Keywords:                       | Prevalence, Risk factors, Prevention, Outcome, Congenital anomaly                                                                                                                                                                                                                                                                                                                                                                                     |
|                                 |                                                                                                                                                                                                                                                                                                                                                                                                                                                       |

SCHOLARONE™  
Manuscripts

1  
2  
3  
4 **Congenital anomalies and associated risk factors in a Saudi**  
5  
6 **population: a cohort study from pregnancy to age 2 years**  
7  
8  
9

10 Ahmed M Kurdi<sup>1</sup>, Muhammad A Majeed-Saidan<sup>2</sup>, Maha S Al Rakaf<sup>1</sup>,  
11  
12 Amal M AlHashem<sup>2</sup>, Lorenzo D Botto<sup>3</sup>, Hassan S Baaqeel<sup>4</sup>, Amer N  
13  
14 Ammari<sup>2</sup>.  
15  
16  
17  
18  
19

20 <sup>1</sup> Division of Maternal and Foetal Medicine, Department of Obstetrics  
21 and Gynaecology, Prince Sultan Military Medical City (PSMMC), P.O.  
22 Box 7897, Riyadh, 11159, Saudi Arabia.  
23  
24  
25  
26  
27  
28

29 <sup>2</sup> Department of Paediatric, Division of neonatal medicine, PSMMC.  
30  
31  
32

33 <sup>2</sup> Department of Paediatric, Division of medical genetics, PSMMC  
34  
35  
36  
37

38 <sup>3</sup> Department of Paediatric, Division of medical genetics, 295 Chipeta  
39 way, Suite 25010, University of Utah school of medicine, Salt Lake  
40 City, UT, USA,  
41  
42  
43  
44  
45  
46

47 <sup>4</sup> Department of Obstetrics and Gynaecology, King Saud Bin  
48 AbdulAziz university for health sciences, Jeddah, Saudi Arabia,  
49  
50  
51  
52  
53

54 **Running title:** Congenital anomalies and Risk Factors in a Saudi  
55  
56  
57  
58  
59  
60  
61  
62  
63  
64  
65  
66  
67  
68  
69  
70  
71  
72  
73  
74  
75  
76  
77  
78  
79  
80  
81  
82  
83  
84  
85  
86  
87  
88  
89  
90  
91  
92  
93  
94  
95  
96  
97  
98  
99  
100  
101  
102  
103  
104  
105  
106  
107  
108  
109  
110  
111  
112  
113  
114  
115  
116  
117  
118  
119  
120  
121  
122  
123  
124  
125  
126  
127  
128  
129  
130  
131  
132  
133  
134  
135  
136  
137  
138  
139  
140  
141  
142  
143  
144  
145  
146  
147  
148  
149  
150  
151  
152  
153  
154  
155  
156  
157  
158  
159  
160  
161  
162  
163  
164  
165  
166  
167  
168  
169  
170  
171  
172  
173  
174  
175  
176  
177  
178  
179  
180  
181  
182  
183  
184  
185  
186  
187  
188  
189  
190  
191  
192  
193  
194  
195  
196  
197  
198  
199  
200  
201  
202  
203  
204  
205  
206  
207  
208  
209  
210  
211  
212  
213  
214  
215  
216  
217  
218  
219  
220  
221  
222  
223  
224  
225  
226  
227  
228  
229  
230  
231  
232  
233  
234  
235  
236  
237  
238  
239  
240  
241  
242  
243  
244  
245  
246  
247  
248  
249  
250  
251  
252  
253  
254  
255  
256  
257  
258  
259  
260  
261  
262  
263  
264  
265  
266  
267  
268  
269  
270  
271  
272  
273  
274  
275  
276  
277  
278  
279  
280  
281  
282  
283  
284  
285  
286  
287  
288  
289  
290  
291  
292  
293  
294  
295  
296  
297  
298  
299  
300  
301  
302  
303  
304  
305  
306  
307  
308  
309  
310  
311  
312  
313  
314  
315  
316  
317  
318  
319  
320  
321  
322  
323  
324  
325  
326  
327  
328  
329  
330  
331  
332  
333  
334  
335  
336  
337  
338  
339  
340  
341  
342  
343  
344  
345  
346  
347  
348  
349  
350  
351  
352  
353  
354  
355  
356  
357  
358  
359  
360  
361  
362  
363  
364  
365  
366  
367  
368  
369  
370  
371  
372  
373  
374  
375  
376  
377  
378  
379  
380  
381  
382  
383  
384  
385  
386  
387  
388  
389  
390  
391  
392  
393  
394  
395  
396  
397  
398  
399  
400  
401  
402  
403  
404  
405  
406  
407  
408  
409  
410  
411  
412  
413  
414  
415  
416  
417  
418  
419  
420  
421  
422  
423  
424  
425  
426  
427  
428  
429  
430  
431  
432  
433  
434  
435  
436  
437  
438  
439  
440  
441  
442  
443  
444  
445  
446  
447  
448  
449  
450  
451  
452  
453  
454  
455  
456  
457  
458  
459  
460  
461  
462  
463  
464  
465  
466  
467  
468  
469  
470  
471  
472  
473  
474  
475  
476  
477  
478  
479  
480  
481  
482  
483  
484  
485  
486  
487  
488  
489  
490  
491  
492  
493  
494  
495  
496  
497  
498  
499  
500  
501  
502  
503  
504  
505  
506  
507  
508  
509  
510  
511  
512  
513  
514  
515  
516  
517  
518  
519  
520  
521  
522  
523  
524  
525  
526  
527  
528  
529  
530  
531  
532  
533  
534  
535  
536  
537  
538  
539  
540  
541  
542  
543  
544  
545  
546  
547  
548  
549  
550  
551  
552  
553  
554  
555  
556  
557  
558  
559  
560  
561  
562  
563  
564  
565  
566  
567  
568  
569  
570  
571  
572  
573  
574  
575  
576  
577  
578  
579  
580  
581  
582  
583  
584  
585  
586  
587  
588  
589  
590  
591  
592  
593  
594  
595  
596  
597  
598  
599  
600  
601  
602  
603  
604  
605  
606  
607  
608  
609  
610  
611  
612  
613  
614  
615  
616  
617  
618  
619  
620  
621  
622  
623  
624  
625  
626  
627  
628  
629  
630  
631  
632  
633  
634  
635  
636  
637  
638  
639  
640  
641  
642  
643  
644  
645  
646  
647  
648  
649  
650  
651  
652  
653  
654  
655  
656  
657  
658  
659  
660  
661  
662  
663  
664  
665  
666  
667  
668  
669  
670  
671  
672  
673  
674  
675  
676  
677  
678  
679  
680  
681  
682  
683  
684  
685  
686  
687  
688  
689  
690  
691  
692  
693  
694  
695  
696  
697  
698  
699  
700  
701  
702  
703  
704  
705  
706  
707  
708  
709  
710  
711  
712  
713  
714  
715  
716  
717  
718  
719  
720  
721  
722  
723  
724  
725  
726  
727  
728  
729  
730  
731  
732  
733  
734  
735  
736  
737  
738  
739  
740  
741  
742  
743  
744  
745  
746  
747  
748  
749  
750  
751  
752  
753  
754  
755  
756  
757  
758  
759  
760  
761  
762  
763  
764  
765  
766  
767  
768  
769  
770  
771  
772  
773  
774  
775  
776  
777  
778  
779  
780  
781  
782  
783  
784  
785  
786  
787  
788  
789  
790  
791  
792  
793  
794  
795  
796  
797  
798  
799  
800  
801  
802  
803  
804  
805  
806  
807  
808  
809  
810  
811  
812  
813  
814  
815  
816  
817  
818  
819  
820  
821  
822  
823  
824  
825  
826  
827  
828  
829  
830  
831  
832  
833  
834  
835  
836  
837  
838  
839  
840  
841  
842  
843  
844  
845  
846  
847  
848  
849  
850  
851  
852  
853  
854  
855  
856  
857  
858  
859  
860  
861  
862  
863  
864  
865  
866  
867  
868  
869  
870  
871  
872  
873  
874  
875  
876  
877  
878  
879  
880  
881  
882  
883  
884  
885  
886  
887  
888  
889  
890  
891  
892  
893  
894  
895  
896  
897  
898  
899  
900  
901  
902  
903  
904  
905  
906  
907  
908  
909  
910  
911  
912  
913  
914  
915  
916  
917  
918  
919  
920  
921  
922  
923  
924  
925  
926  
927  
928  
929  
930  
931  
932  
933  
934  
935  
936  
937  
938  
939  
940  
941  
942  
943  
944  
945  
946  
947  
948  
949  
950  
951  
952  
953  
954  
955  
956  
957  
958  
959  
960  
961  
962  
963  
964  
965  
966  
967  
968  
969  
970  
971  
972  
973  
974  
975  
976  
977  
978  
979  
980  
981  
982  
983  
984  
985  
986  
987  
988  
989  
990  
991  
992  
993  
994  
995  
996  
997  
998  
999  
1000

1  
2  
3  
4 **Corresponding author:**  
5

6 **Dr. Ahmed M. Kurdi, MD, German Board, DFM**  
7

8 Consultant Maternal and Foetal Medicine  
9

10 Avenue Medical Center  
11

12 Kingdom of Saudi Arabia  
13

14 Telephone: work +966-112000099 Ext. 158  
15

16 Mobile: +966505451701  
17

18 Fax: 0096611-4500185  
19

20 Email: [ahmedkurdi1950@gmail.com](mailto:ahmedkurdi1950@gmail.com)  
21  
22  
23  
24  
25  
26  
27  
28  
29  
30

31 **Abstract**  
32  
33  
34  
35

36 **Objective:** To assess the three key issues for CAs prevention and care,  
37 namely, CA prevalence, risk factor prevalence, and survival, in a  
38 longitudinal cohort in Riyadh, Saudi Arabia.  
39  
40

41 **Setting:** Tertiary care centre, Riyadh, Saudi Arabia.  
42  
43

44 **Participants:** Saudi women enrolled during pregnancy over three  
45 years and their 28,646 eligible pregnancy outcomes (births, stillbirths  
46 and elective terminations of pregnancy for foetal anomalies  
47 [ETOPFAs]). The nested case-control study evaluated the CA risk  
48 factor profile of the underlying cohort. All CA cases (1,179) and  
49 unaffected controls (1,262) were followed through age 2 years.  
50 Referred mothers because of foetal anomaly and mothers who  
51  
52  
53  
54  
55  
56  
57  
58  
59  
60

1  
2  
3  
4 delivered outside the study centre and their pregnancy outcome were  
5 excluded.  
6

7  
8 **Primary outcome measures:** Prevalence and pattern of major CAs,  
9 Frequency of CA-related risk factors, and survival through age 2 years.  
10

11 **Results:** The birth prevalence of CAs was 412/10,000 births (95% CI  
12 388.6 to 434.9), driven mainly by congenital heart disease (148 per  
13 10,000) (95% CI 134 to 162), renal malformations (113, 95% CI 110 to  
14 125), neural tube defects (19, 95% CI 25.3 to 38.3), and chromosomal  
15 anomalies (27, 95% CI 21 to 33). In this study, the burden of  
16 potentially modifiable risk factors included high rates of diabetes  
17 (7.3%, OR 1.98, 95% CI 1.04 to 2.12), maternal age >40 years (7.0%,  
18 OR 2.1, 95% CI 1.35 to 3.3), consanguinity (54.5%, OR 1.5, 95% CI 1.28  
19 to 1.81). The mortality for live births with CAs at 2 years of age was  
20 15.8%.  
21

22 **Conclusions:** This study documented specific opportunities to  
23 improve primary prevention and care. Specifically, folic acid  
24 fortification (the neural tube defect prevalence was >3 times that  
25 theoretically achievable by optimal fortification), preconception  
26 diabetes screening and consanguinity-related counselling could have  
27 significant and broad health benefits in this cohort and arguably in  
28 the larger Saudi population.  
29  
30  
31

### 32 **Strengths and limitations of this study:**

- 33 • Babies with CAs are diagnosed prospectively, prenatally, and  
34 postnatally and followed up to 2 years of age.  
35  
36  
37  
38  
39  
40  
41  
42  
43  
44  
45  
46  
47  
48  
49  
50  
51  
52  
53  
54  
55  
56  
57  
58  
59  
60



- Involvement of multidisciplinary teams in establishing the final diagnosis.
- Inclusion of elective termination of pregnancies with lethal CAs and stillbirths.
- Single-centre study. The pregnancy cohort was mainly from families of Saudi army personnel dependents, which could be a limiting factor.

**Funding statement:** This project was supported by a generous grant from King Abdul-Aziz City for Science and Technology (KACST) through the National Science, Technology and Innovation Plan (NSTIP). Project No: 09-MED748-21.

**Disclaimer:** The funding institution had no role in the study design, data collection, analysis, interpretation of data, the writing of the various reports or the decision for submission for publication. All authors have full independence from the funder, have full access to the data in the study and take full responsibility for the integrity of the data and the accuracy of the analysis.

**Competing interests statement:** None declared

All authors have completed the ICMJE uniform disclosure from [www.icmje.org-coi\\_disclosure.pdf](http://www.icmje.org-coi_disclosure.pdf) and declare no support from any organization for the submitted research article; no financial

1  
2  
3  
4 relationship with any organization that might have an interest in the  
5 submitted work in the previous three years; and no other  
6 relationships or activities that could appear to have influenced the  
7 submitted work.  
8  
9  
10  
11  
12  
13  
14

15 **Key words:** Congenital anomalies, Prevalence, Risk factors, Prevention,  
16 and Outcome  
17  
18  
19  
20  
21  
22  
23  
24  
25  
26  
27  
28  
29  
30

## 31 **Congenital anomalies and associated risk factors in a Saudi** 32 **population: a cohort study from pregnancy to age 2 years** 33 34 35 36 37

### 38 **Introduction** 39

40 Because of their lifelong impact on health and survival, congenital  
41 anomalies (CAs) are increasingly recognized as a global health  
42 priority.<sup>1 2</sup> With better control of infections and other causes of early  
43 mortality, CAs are becoming increasingly important drivers of child  
44 survival and health in low- and middle-income countries.<sup>1 3</sup> CAs affect  
45 approximately an estimated 1 in 33 newborns, contribute each year to  
46 300,000 deaths in the first month of life, and are associated with 3·2  
47 million birth-related disabilities.<sup>3</sup> Accordingly, the World Health  
48 Assembly has emphasized the urgent need for action to help prevent,  
49  
50  
51  
52  
53  
54  
55  
56  
57  
58  
59  
60

1  
2  
3  
4 diagnose, and provide timely interventions.<sup>1</sup> Data on the prevalence  
5 and mortality associated with CAs are scarce in many low- and  
6 middle-income countries, with most reports originating in high-  
7 income areas. For example, in a population-based study of livebirths  
8 with CAs in the United Kingdom, the 20-year survival rate was 85.5%.<sup>4</sup>  
9  
10 Similarly, the 25-year survival rate among livebirths with CAs in New  
11 York state was 82.5%,<sup>5</sup> with a documented improvement from the  
12 1980s (78.1% from 1983 –1988) to the early 2000s (89.3% from 2001-  
13 2006). Among CAs, the major drivers of mortality were cardiovascular  
14 anomalies (51.1%) and chromosomal anomalies (33.1%). In Korea,  
15 infant mortality among babies with CAs was 6.8/10,000 live births,  
16 and foetal mortality was 13.5/10,000 total births.<sup>6</sup>  
17  
18  
19  
20  
21  
22  
23  
24  
25  
26  
27  
28  
29  
30  
31  
32  
33  
34  
35

36 However, local action, whether focused on primary prevention or on  
37 improving care, is most effective when based on reliable information  
38 about the key indicators of the causes and outcomes of CAs in the  
39 underlying population. In this study, we implemented an integrated  
40 approach to generate these data in a systematic cohort of women,  
41 tracked from mid-gestation through the second year of life of their  
42 children, to assess the prevalence of CAs, the burden of potentially  
43 modifiable risk factors, and the survival of affected children, as a basis  
44 for better prevention and care.<sup>7</sup>  
45  
46  
47  
48  
49  
50  
51  
52  
53  
54  
55  
56  
57  
58  
59  
60

## Methods

**Setting.** The Prince Sultan Military Medical City (PSMMC) is a tertiary teaching institution with 1,250 beds and approximately 10,000 annual deliveries. PSMMC primarily serves Saudi army personnel and their families and is a referral centre for the other 16 military hospitals in the Kingdom of Saudi Arabia. The foetal medicine unit includes advanced imaging facilities, including 3D and 4D scanning. The paediatric department includes all major subspecialties, including medical genetics, paediatric surgery, and paediatric cardiology.

**Study design** This is an observational, prospective cohort study with a nested case-control study. The eligible cohort includes pregnancies of women who had their antenatal care and their routine antenatal anomaly ultrasound scan examination (USS) between 18 weeks and 22 weeks of gestation at PSMMC from 1 July 2010 through 30 June 2013 (figure 1).

In addition, Saudi women who are eligible for their antenatal care at PSMMC, but who did not have an antenatal screening ultrasound examination and later delivered at PSMMC, are also included in the study.

**Inclusions and exclusions.** Pregnancy outcomes included in the study were live births, stillbirths (foetal deaths at 20 weeks' gestation or

1  
2  
3  
4 later), and pregnancies electively terminated because of foetal  
5  
6 anomalies (ETOPFAs). The study excluded spontaneous abortions,  
7  
8 pregnancies referred from other hospitals because of a diagnosis of a  
9  
10 foetal anomaly, and babies with CAs delivered elsewhere and referred  
11  
12 to PSMC for evaluation and management.  
13  
14  
15  
16  
17  
18

19 **Evaluations.** Initial antenatal screening tests included a complete  
20  
21 blood count, liver and kidney function tests, blood group and  
22  
23 antibody screening, rubella and Toxoplasma status, hepatitis B screen,  
24  
25 random blood sugar and HbA1c levels, VDRL, sickle cell screen and  
26  
27 urine analysis. A glucose tolerance test was performed at 24-28 weeks  
28  
29 of gestation.  
30  
31  
32  
33  
34  
35  
36

37 When a structural birth defect was diagnosed or suspected  
38  
39 antenatally, mothers were counselled by one of the investigators  
40  
41 (MSR, AMK), demographic and exposure information was gathered,  
42  
43 and both parents were scheduled within 2-4 weeks to attend a  
44  
45 dedicated clinic developed for the study. At that time, a detailed  
46  
47 diagnostic and care plan was developed, which may have included  
48  
49 further blood tests and foetal imaging, or amniocentesis, chorionic  
50  
51 villous and/or foetal blood sampling for genetic studies. Consent was  
52  
53 requested for cord blood collection for future molecular testing.  
54  
55  
56  
57  
58  
59  
60

1  
2  
3  
4 On the first day of life, all newborns in the cohort (with and without  
5  
6 CAs) were examined by a paediatrician as part of the first clinical  
7  
8 screening examination. Babies with CA, whether identified antenatally  
9  
10 or postnatally, underwent diagnostic investigations as clinically  
11  
12 indicated (e.g., echocardiogram, cardiac catheterization, or other  
13  
14 imaging studies; metabolic and molecular testing) and were referred  
15  
16 to the appropriate subspecialists. A clinical geneticist evaluated all  
17  
18 babies with suspected syndromes or multiple CAs. A letter was  
19  
20 distributed to all clinical departments describing the study and req  
21  
22 uesting that they inform the study team about all infants and children  
23  
24 with CAs born at PSMMC.  
25  
26  
27  
28  
29  
30  
31  
32

33 **Evaluations for specific congenital anomalies.** If congenital heart  
34  
35 disease (CHD) was detected or suspected antenatally on USS  
36  
37 examination, the mother was referred to the paediatric cardiologist  
38  
39 for a foetal echocardiogram. All these infants were also re-evaluated  
40  
41 after birth by a paediatric cardiologist. Isolated atrial septal defects  
42  
43 (ASDs II) were re-evaluated at 6 to 12 months of age, and if the  
44  
45 echocardiogram showed no evidence of ASD II at the time, the infant  
46  
47 was not considered a case. Congenital hydronephrosis (HN) was  
48  
49 graded using the Society of Foetal Urology grading system.<sup>8</sup> Babies  
50  
51 with grade one HN were given a repeat US examination within the  
52  
53 first year of life; if HN had resolved, the baby was not considered a  
54  
55 case. Chromosomal analysis was performed according to standard  
56  
57  
58  
59  
60

1  
2  
3  
4 procedures, and a minimum of 20 metaphases were analysed  
5  
6 (Applied Imaging CytoVision Karyotyping System). Reports followed  
7  
8 the International System of Human Cytogenetic Nomenclature (ISCN  
9  
10 2013). Molecular studies were performed at the Biocenthia Health  
11  
12 Group in Germany (<http://www.bioscientia.de/en/>), the Mayo Medical  
13  
14 Laboratories in the United States, and at the Developmental Genetic  
15  
16 Laboratory at King Faisal specialist hospital and research centre in  
17  
18 Saudi Arabia.  
19  
20  
21  
22  
23  
24  
25

26 **Nested case-control study.** The nested case-control study included  
27  
28 as cases all women in the cohort with a pregnancy diagnosed with a  
29  
30 CA and as controls a random sample of women in the cohort with a  
31  
32 normal USS. The random sample was generated daily by taking the  
33  
34 morning list of scheduled USS and using a random number generator  
35  
36 (<http://www.random.org>) to select potential controls so that the  
37  
38 control sample would eventually be at least as large as the estimated  
39  
40 total number of cases. If a woman initially selected as a control had a  
41  
42 pregnancy diagnosed with a birth defect at the initial date or later,  
43  
44 she was then included in the case group. Investigators administered  
45  
46 an in-person structured interview to case and control mothers. The  
47  
48 interview included information about age (for both parents); weight  
49  
50 before pregnancy; height; parity; family income (father's income or  
51  
52 combined parental income if the mother worked); maternal education  
53  
54 level (illiterate, primary school graduate, secondary school graduate,  
55  
56  
57  
58  
59  
60

1  
2  
3  
4 or university graduate); parental occupation (mother; housewife,  
5  
6 teacher, student and others, father; soldier, officer or civilian  
7  
8 employee); folic acid (FA) supplement use (regular use before and  
9  
10 during the 1<sup>st</sup> trimester of pregnancy; irregular or only postconception  
11  
12 use; no use or uncertain use as per the mother's report); parental  
13  
14 smoking (one or both parents smoking during the current pregnancy);  
15  
16 maternal radiation exposure during the first trimester; maternal  
17  
18 diabetes (overt or gestational) as defined by the International  
19  
20 Association of Diabetes and Pregnancy study groups <sup>9</sup> and HbA1c  
21  
22 level; family history of CAs (in previous pregnancies and in maternal  
23  
24 or paternal lineages); drug and medication use during the first  
25  
26 trimester; and chronic maternal systemic illnesses (hypothyroidism,  
27  
28 epilepsy, depression, essential hypertension, and bronchial asthma).  
29  
30 Consanguinity was defined as women being first or second cousins to  
31  
32 their husbands (supplementary file).  
33  
34  
35  
36  
37  
38  
39  
40  
41  
42

43 **Follow-up.** Case infants and control infants were examined in the  
44  
45 dedicated study clinic at 1, 6, 12, 18 and 24 months of age. Two  
46  
47 neonatologists and a clinical geneticist supervised the clinic. Babies  
48  
49 with CAs also continued to be followed by the relevant subspecialty  
50  
51 clinics. The remaining cohort (babies without CAs not selected as  
52  
53 controls) was re-examined at 4-8 weeks by the paediatrician for a  
54  
55 second screening examination. A head ultrasound and a postductal  
56  
57 pulse oximetry reading were completed in all babies attending the  
58  
59  
60



1  
2  
3  
4 clinics. If the O<sub>2</sub> saturation was below 95%, the baby was referred to  
5  
6 the paediatric cardiologist for evaluation. If any CAs were detected at  
7  
8 the second screening examination, the babies were referred to the  
9  
10 genetics clinic for further evaluation and diagnosis. If the second  
11  
12 screening examination proved to be normal, then no further follow-  
13  
14 up was arranged. However, if CAs were discovered later in babies up  
15  
16 to 2 years of age, they were included in the study.  
17  
18  
19  
20  
21  
22  
23

24 **Case review, coding, classification.** Congenital anomalies were  
25  
26 coded following the International Statistical Classification of Diseases  
27  
28 and Related Health Problems, 10<sup>th</sup> revision, (ICD10, WHO-2010)  
29  
30 according to the European Concerted Action on Congenital  
31  
32 Anomalies and Twins (EUROCAT) recommended procedures.<sup>10</sup> We did  
33  
34 not include isolated minor anomalies or prematurity-related  
35  
36 conditions such as patent ductus arteriosus or hydrocephalus  
37  
38 complicating intraventricular haemorrhage diagnosed in preterm  
39  
40 babies (<37 completed weeks of gestation). Data were entered in a  
41  
42 version of EUROCAT Data Management Program (EDMP) modified to  
43  
44 include control records and the additional variables generated by the  
45  
46 case-control study and the follow up.  
47  
48  
49  
50  
51

52 **Institutional ethics review.** The study and the consent procedure  
53  
54 were approved by the Ethical Committee of the PSMC (Project No.  
55  
56 366, series of 2009).  
57  
58  
59  
60

## Statistical analysis.

The data collected and used in this study was part of our routine care and was anonymised.

Odds ratios for the association between risk factors and CAs were estimated using multiple logistic regression in a two-step process. An initial set of variables was selected by univariate logistic regression as being associated with CA risk ( $p < 0.05$ ). Variables highly correlated with other variables (e.g., insulin use) were not entered into the model. This initial variable set was then reduced by stepwise backward elimination to produce a more parsimonious model. The final model retained the following covariates: consanguinity, maternal age group, education level, diabetes and history of siblings with a congenital anomaly. The model fit was assessed with the Hosmer and Lemeshow's goodness of fit test and by calculating Nagelkerke R<sup>2</sup>. Statistical analysis was performed with SPSS for Windows, version 15 (SPSS Inc., Chicago, Illinois).

**Patient and public involvement:** Our long-term experience with the families and their offspring has helped us to shape the research question and the study design. All families recruited were informed about the study objectives. None of the parents were involved in the study design, recruitment to and conduct of the study. The study results were disseminated to the community and to the professional

1  
2  
3  
4 health care provider through social media, newspapers, presentation  
5  
6 at various conferences, and scientific publications.  
7  
8  
9  
10

## 11 12 13 14 **Results**

15  
16  
17 Of the 31,032 birth outcomes of the 30,351 women followed since  
18 pregnancy, 30,753 (99.1%) occurred at PSMC (figure 2). Of these,  
19 2,107 were spontaneous abortions (6.9%) and were not included in  
20 the study, leaving 28,646 eligible births (27,726 singleton births and  
21 920 multiple births). The overall stillbirth rate was slightly less than  
22 1% (figure 2).  
23  
24  
25  
26  
27  
28  
29  
30  
31  
32

33 **Birth defect occurrence, detection, and mortality.** Of the 28,646  
34 eligible pregnancy outcomes, 1,179 were diagnosed with a CA, for an  
35 overall prevalence of 412/10,000 (95% CI 388.6 to 434.9) total births,  
36 or 1 in 24 births. Of these 1,179 cases, 38 (3.2%) were stillbirths, and  
37 18 (1.5%) were electively terminated because of lethal malformations  
38 (13 with anencephaly, 3 with severe hydrops foetalis and cystic  
39 hygroma, 1 with Meckel-Gruber syndrome and 1 with bilateral renal  
40 agenesis) (table 1). The antenatal detection rate among women who  
41 has had an antenatal ultrasound screening examination was 70.6%  
42 (561/795). In 90% of these cases (505/561), the diagnosis was made  
43 by ultrasound scan at 22 weeks of gestation or later. Of the 618  
44 babies diagnosed postnatally, 296 (47.9%) were diagnosed at birth,  
45  
46  
47  
48  
49  
50  
51  
52  
53  
54  
55  
56  
57  
58  
59  
60

1  
2  
3  
4 239 (38.7%) between 1 and 7 days, 29 (4.7%) between 1 and 4 weeks,  
5  
6 52 (8.4%) between 1 and 12 months, and 2 (0.3%) after one year of  
7  
8 age. Mortality among livebirths with CAs (table 1) was 14.1% in the  
9  
10 first year, nearly half of which occurred in the first week of life, with a  
11  
12 total mortality of 15.8% by the end of the second year of life.

13  
14  
15 Mortality at two years was 0.9% in the unaffected cohort (0.24% for  
16  
17 live births). Among the controls, there were 8 stillbirths, two deaths  
18  
19 because of prematurity and its complications and one death at 2  
20  
21 years of age because of acute fulminating leukaemia.  
22  
23  
24  
25  
26

### 27 **Contribution of specific congenital anomalies.**

28  
29 Approximately half of the overall birth prevalence was due to  
30  
31 congenital heart disease and central nervous system anomalies.  
32  
33 Neural tube defects occurred at a rate of 19 per 10,000 (95% CI, 13.8  
34  
35 to 23.9) (1 in 526 births). Severe CHD occurred at a rate of 32 per  
36  
37 10,000 (95% CI, 25.3 to 38.3) (1 in 313 births) and accounted for  
38  
39 21.4% of all CHD cases. Chromosomal anomalies whose risk is  
40  
41 associated with increased maternal age (trisomies 21, 18, and 13)  
42  
43 occurred with a combined prevalence of 25 per 10,000 (95% CI, 19.6  
44  
45 to 31.3) (1 in 392 births). Trisomy 21 accounted for most cases of  
46  
47 chromosomal anomalies, with a prevalence of 22 per 10,000 (95% CI,  
48  
49 16.7 to 27.4) or 1 in 456 births (table 2).  
50  
51  
52  
53  
54  
55  
56

57 Two-thirds of all cases of CAs (773/1179, 65.6%) were isolated (e.g.,  
58  
59 they involved a single body system) (table 3).  
60

1  
2  
3  
4  
5  
6 **Risk factors.** As a proxy of risk factor prevalence in the underlying  
7 population, we used the frequency of selected maternal or parental  
8 risk factors for CAs among controls in the nested case-control study  
9 (figure 3). The most frequent potentially modifiable factors included  
10 lack of periconception folic acid supplement use, consanguinity, high  
11 body mass index, advanced maternal age, smoking (first or second-  
12 hand) and maternal diabetes. Nearly 6% of non-primiparous women  
13 had one prior child with a major CA. In the univariate analysis, the  
14 nested case-control study (table 4) detected overall increased odds  
15 ratios for all CAs combined for consanguinity, advanced maternal age,  
16 high parity, maternal illiteracy, maternal university education, X-ray  
17 exposure during pregnancy, maternal diabetes, and positive family  
18 history of CA in a sibling. Increased odds ratios with confidence  
19 intervals, including unity, were also found for maternal depression  
20 and hypertension (table 4). In the multiple logistic regression model,  
21 only first-degree consanguinity (OR 1.5, 95% CI 1.28 to 1.81),  
22 maternal age of more than forty years (OR 2.1, 95% CI 1.35 to 3.3),  
23 maternal illiteracy (OR 1.4, 95% CI 1.17 to 1.7), maternal university  
24 level education, (OR 1.74, 95% CI 1.24 to 2.44), maternal diabetes  
25 mellitus (OR 1.98, 95% CI 1.33 to 2.95) and history of a sibling with an  
26 anomaly (OR 1.49, 95% CI 1.04 to 2.12) were retained in the model  
27 (table 5). The Hosmer and Lemeshow goodness of fit p value was  
28 0.08, and Nagelkerke R<sup>2</sup> was 0.055, explaining 6% of the effect on  
29 CAs.  
30  
31  
32  
33  
34  
35  
36  
37  
38  
39  
40  
41  
42  
43  
44  
45  
46  
47  
48  
49  
50  
51  
52  
53  
54  
55  
56  
57  
58  
59  
60

1  
2  
3  
4  
5  
6  
7 Of the 223 mothers with DM who had CA-affected foetuses  
8 (223/1,179, 18.9%), 36 (3%) had overt DM (ODM), and 187 (15.7%)  
9 had gestational DM (GDM). Of the mothers with GDM, 50 (26.7%)  
10 had gestational DM (GDM). Of the mothers with GDM, 50 (26.7%)  
11 required insulin. Among the controls, 200 mothers had diabetes  
12 (200/1,179, 15.8%), of whom 12 (0.9%) had ODM, and 188 (15.9%)  
13 had GDM. Of the latter, 29 (14.5%) required insulin.  
14  
15  
16  
17  
18  
19  
20

21 Maternal age over 40 years was high at 7% among mothers of babies  
22 with CA compared to 3.6% among controls mothers (OR 2.09, 95% CI  
23 1.43 to 3.05,  $p=0.0002$ ) (table 4). This was mainly due to  
24 chromosomal aneuploidy. Further subgroup analysis showed non-  
25 chromosomal anomalies (NCA) was found in 55 mothers (4.6%)  
26 compared to 3.6% among the controls mothers (OR 1.29, 95% CI 0.86  
27 to 1.9,  $p= 0.2$ ). The main NCA found were CHD in 22 (40%), 7 (12.7%)  
28 were severe CHD and neural tube defects in 5 (9.1%).  
29  
30  
31  
32  
33  
34  
35  
36  
37  
38  
39  
40  
41  
42  
43  
44  
45  
46  
47  
48  
49  
50

## Discussion

51 This longitudinal study of CAs in a pregnancy cohort in Saudi Arabia,  
52 followed from mid-gestation through age 2 years, had three  
53 integrated aims: to describe the population's risk factor profile,  
54 document the associated birth prevalence of CAs, and assess survival  
55  
56  
57  
58  
59  
60

1  
2  
3  
4 as a critical health outcome.<sup>7</sup> Gathering information about these three  
5  
6 critical areas is crucial when planning and evaluating policies and  
7  
8 interventions, be they aimed at primary prevention (e.g., folic acid  
9  
10 fortification to prevent neural tube defects) or at improving care.  
11  
12  
13

14  
15 The burden of CAs was high in this population. The study  
16  
17 documented a remarkably high birth prevalence of CAs of 412 per  
18  
19 10,000 or 1 in 24 total births. This rate is higher than that reported in  
20  
21 studies from many high-income countries, as those reported by  
22  
23 EUROCAT (261/10,000 births),<sup>11</sup> BINOCAR (206/10,000 births),<sup>12</sup> and  
24  
25 the Bradford (BIB) study (305/10,000).<sup>13</sup> This prevalence of CAs is also  
26  
27 higher than that previously reported from Saudi Arabia (115 to 257  
28  
29 per 10,000 live births).<sup>14-16</sup> Although some studies report an even  
30  
31 higher prevalence, e.g., such as an antenatal CA prevalence of  
32  
33 521/10,000 pregnancies screened, and a prevalence among livebirths  
34  
35 of 465/10,000,<sup>17</sup> these figures may be overestimates of the true  
36  
37 prevalence because of the inclusion of mothers referred from other  
38  
39 institutions. In the current study, we strove to obtain as complete an  
40  
41 ascertainment as possible by initiating follow-up in pregnancy and  
42  
43 extending it through the second year of life, by including stillbirths  
44  
45 and elective termination of pregnancies for foetal anomalies  
46  
47 (ETOPFAs), and by successfully including some genetic conditions that  
48  
49 tend to be diagnosed after the newborn period.  
50  
51  
52 However, the high prevalence of CAs is likely to be due not only to  
53  
54 the completeness of the ascertainment but also to the high frequency  
55  
56  
57  
58  
59  
60

1  
2  
3  
4 of adverse risk factors in the underlying population, as documented in  
5  
6 the controls of the nested case-control study. When focusing on  
7  
8 factors that are potentially modifiable, three such factors seem to  
9  
10 stand out. The first is insufficient folic acid use in this cohort (<10% in  
11  
12 the periconception period). The rate of neural tube defects was 19  
13  
14 per 10,000/births (table 2), at least three times higher than the rate of  
15  
16 6 per 10,000/births, which seems achievable by providing sufficient  
17  
18 folic acid to women of childbearing age.<sup>18 19</sup> Although legislation  
19  
20 requiring the mandatory fortification of flour had been in place in  
21  
22 Saudi Arabia for years prior to this study (Kingdom of Saudi Arabia,  
23  
24 2000; Food fortification initiative, 2013),<sup>20 21</sup> our findings suggest that  
25  
26 there are gaps in coverage or effectiveness, which could be evaluated  
27  
28 with nutrition or blood folate surveys. Such information would  
29  
30 provide important evidence to improve folate sufficiency in the  
31  
32 population, with its attendant health benefits, including a substantial  
33  
34 reduction in the burden of neural tube defects. Because of the  
35  
36 inclusion of stillbirths and pregnancy terminations, this study also  
37  
38 provides a fuller estimate of the potential benefits of primary  
39  
40 prevention than if only livebirths had been identified (representing  
41  
42 just over half of all cases, 30/54).  
43  
44  
45  
46  
47  
48  
49  
50  
51

52 The second factor is maternal diabetes (tables 4 and 5). Diabetes is an  
53  
54 established risk factor for many CAs, and diabetes control before  
55  
56 conception has been shown to reduce and nearly normalize CA risk.<sup>9</sup>  
57  
58  
59 <sup>22 23</sup> Several avenues for preventing diabetes and its health effects are  
60



1  
2  
3  
4 available, including population screening (many diabetic women are  
5 undiagnosed), health care and counselling, and education on healthy  
6 lifestyle and dietary choices starting from childhood. The current  
7  
8 reported prevalence in Saudi Arabia of overt diabetes in women  
9  
10 above age 40 years ranges from 7.7% – 21.7%.<sup>24 - 26</sup> In the study  
11  
12 cohort, overt diabetes was observed in 2% of women and increased  
13  
14 in women 30 years old or older. Al-Nozha and colleagues<sup>27</sup> reported  
15  
16 a prevalence of overt diabetes of 11.6% in women aged 30-39 years  
17  
18 and >22% in women aged ≥40 years compared to 2.7% and 7.1% in  
19  
20 our study, respectively. Though lower than these estimates, the  
21  
22 prevalence of overt diabetes in the study cohort is alarmingly high.  
23  
24  
25  
26  
27  
28  
29  
30

31  
32 Third, we observed a high rate of parental consanguinity (54.5%),  
33  
34 especially first-cousin marriages (48.0%). These marriages are  
35  
36 common in many parts of the Middle East, Africa, and the Indian  
37  
38 subcontinent,<sup>28-30</sup> with one estimate suggesting that “one billion  
39  
40 people live in communities with a preference for consanguineous  
41  
42 marriage” (Hamamy, 2012).<sup>29</sup> This preference has deep social roots.  
43  
44 Nevertheless, education combined with preconception and premarital  
45  
46 counselling can be important prevention strategies by focusing on  
47  
48 increasing awareness to allow couples to make more informed  
49  
50 choices. Close consanguinity is a known risk factor for CAs,<sup>30</sup> as well  
51  
52 as Mendelian conditions such as inborn errors of metabolism  
53  
54 (occurring in 1 in 770 births in this study), as confirmed in prior  
55  
56 reports from Saudi Arabia and from the world literature.<sup>31 32</sup>  
57  
58  
59  
60

1  
2  
3  
4  
5  
6 Advanced maternal age (>40 years) was high (7%) among mothers of  
7 babies affected with CA in the cohort studied. This is comparable to  
8 6% among French mothers but higher than mothers from other 14  
9 European countries (Loane et.al., 2009).<sup>33</sup> Advanced maternal age is  
10 increasing over the last two decades<sup>33,34</sup> and is affecting the  
11 prevalence of aneuploidy. The risk for NCA were similar to controls  
12 and recent reports suggest that it has a protective effect.<sup>35</sup> Several  
13 reports have shown a higher prevalence of specific CA among babies  
14 of mothers at this age group like neural tube defects, cleft lip,  
15 oesophageal atresia with or without tracheal fistula. We found a high  
16 prevalence of CHD and neural tube defects.  
17  
18  
19  
20  
21  
22  
23  
24  
25  
26  
27  
28  
29  
30

31  
32 Structured health education programs at several levels should  
33 emphasize the importance of planned pregnancies at the optimal age  
34 (20-30 years), ensure adequate periconceptual folic acid intake (400  
35 to 800 µg daily)<sup>36</sup> and detailed fetal anomaly scan. A nation-wide CA  
36 registry will help to give a fuller picture and monitor the trends and  
37 the results of any intervention.  
38  
39  
40  
41  
42  
43  
44  
45  
46  
47  
48  
49  
50

51 We did not diagnose cases of congenital rubella syndrome. This is  
52 likely due to the active immunization programme in Saudi Arabia,  
53 with a measles, mumps and rubella vaccine uptake of 97%. In  
54  
55  
56  
57  
58  
59  
60

1  
2  
3  
4 addition, preschool age girls are given a booster vaccine against  
5  
6 rubella.  
7  
8  
9

10  
11 In a prior publication, we reported a low regular (periconception) folic  
12 acid (FA) intake (9.7%) in this study population <sup>37</sup> and suggested  
13 fortification of rice in addition to wheat, complemented by education  
14 programmes supporting FA supplementation, as an efficient strategy  
15 to achieve folate sufficiency in the population.  
16  
17  
18  
19  
20  
21  
22

23  
24 Finally, our findings emphasize the impact of CAs in this  
25 population by documenting not only birth prevalence but also  
26 the associated early mortality (table 1), which was 15.8% by the  
27 second year of life (nearly all in the first year). Further  
28 supporting the high impact of CAs are the findings by Majeed-  
29 Saidan and colleagues <sup>38</sup> who reported that 36% of deaths in a  
30 large neonatal intensive care unit in Riyadh were due to lethal  
31 CAs. These findings highlight the crucial importance and  
32 urgency to improve care in addition to primary prevention.  
33  
34  
35  
36  
37  
38  
39  
40  
41  
42  
43  
44  
45  
46  
47  
48

49 This study demonstrated the importance of the "triple  
50 surveillance" programme, suggested by Botto and  
51 Masteroiacova,<sup>4</sup> for identifying the risk factors for CAs (causes),  
52 estimating the burden of the disease (prevalence), and assessing  
53 disease outcome (mortality). This will ultimately lead to disease  
54  
55  
56  
57  
58  
59  
60

1  
2  
3  
4 burden reduction or prevention by instituting appropriate  
5  
6 interventions.  
7  
8  
9  
10

11  
12 The study has limitations. Because of the cohort design,  
13  
14 the resulting sample size did not allow a more detailed analysis  
15  
16 of specific CA groups. Estimates of some key risk factors, such  
17  
18 as folic acid insufficiency, were based on maternal reports (e.g.,  
19  
20 reported supplement use) rather than biomarkers. Furthermore,  
21  
22 the pregnancy cohort was mainly from families of Saudi army  
23  
24 personnel dependents. Although the Saudi Army recruits from  
25  
26 all sectors of Saudi society, a broader survey of the Saudi  
27  
28 population would provide additional information to better  
29  
30 assess gaps and opportunities for prevention and care  
31  
32 nationwide.  
33  
34  
35  
36  
37  
38  
39  
40

41 **Conclusion.** This longitudinal surveillance programme that  
42  
43 encompassed the causal chain from risk factors to health outcomes  
44  
45 documented several opportunities to reduce the burden of CAs  
46  
47 through primary prevention and better care. Folic acid fortification,  
48  
49 preconception diabetes screening, and consanguinity-related  
50  
51 counselling could have significant health benefits in this cohort and  
52  
53 arguably in the larger Saudi population, particularly if associated with  
54  
55 a national CA monitoring programme to support and track the impact  
56  
57 of interventions.  
58  
59  
60

## Acknowledgments

We thank the Medical Services Directorate of the Saudi Armed Forces and the PSMCMC directorate for their support during the initiation and execution of the study; the study's advisory board (Eduardo Castilla, Pierpaolo Mastroiacovo, Ester Garne, Fowzan Alkuraya, and Wesam Kurdi) for advice and guidance throughout the study; and the study secretaries for their commitment and enthusiasm.

## Author's statement:

**AMK** study conception and design, revised the manuscript. **MAMS**, study conception and design, drafting and revising the manuscript., **MSR**, study design, data collection. **AMH**, data collection, revised the manuscript. **LDB**, study design, critically revised the manuscript for intellectual content. **HSB**, statistical analysis and revised the manuscript. **ANA**, study design, data collection, revised the manuscript. All authors approved the submission of the manuscript.

## Written informed consent:

Consent for cord blood samples for future DNA analysis was obtained from the mothers in the nested case-control study only.

## Data sharing statement:

1  
2  
3  
4 Dataset can be obtained on request through a third party "King  
5 AbdulAziz city for science and technology".  
6  
7  
8  
9

10 **Word count: 4,210**  
11  
12  
13  
14  
15  
16  
17  
18

## 19 **References**

- 20  
21  
22  
23  
24 1. World Health Organization. Sixty -Third World Health  
25 Assembly. CA Report by the Secretariat, A63/10. Geneva,  
26 Switzerland: World Health Organization, 2010.  
27  
28  
29  
30  
31  
32  
33 2. World Health Organization. Global Health Observatory  
34 (GHO) data. Under-five mortality 2016.  
35  
36 [http://www.who.int/gho/child health/mortality/mortality und](http://www.who.int/gho/child_health/mortality/mortality_under_five_text/en/)  
37 [er five text/en/](http://www.who.int/gho/child_health/mortality/mortality_under_five_text/en/) (accessed 12 December 2017).  
38  
39  
40  
41  
42  
43  
44  
45  
46 3. Christianson AL, Howson CP, Modell B. Global report on  
47 CA: the hidden toll of dying and disabled children. White  
48 Plains (NY): March of Dimes Defects Foundation 2006.  
49  
50  
51  
52  
53  
54  
55 4. Tennant PWG, Pearce MS, Bythell M, *et al.*  
56  
57 20-year survival of children born with congenital anomalies:  
58  
59  
60

1  
2  
3 a population-based study. *Lancet* 2010; 375: 649–56.  
4  
5  
6

- 7  
8 5. Wang Y, Hu J, Druschel CM, *et al.* Twenty-Five-Year  
9 Survival of Children with Birth Defects in New York State: A  
10 Population-Based Study. *Birth Defects Research (Part A)*  
11 201;1 91:995-1003.  
12  
13  
14  
15  
16  
17  
18 6. Ko HS, Kim DJ, Chung Y, *et al.* A national cohort study  
19 evaluating infant and fetal mortality caused by birth defects  
20 in Korea. *BMJ Open* 2017;7: e017963. doi:10.1136/bmjopen-  
21 2017-017963  
22  
23  
24  
25  
26  
27  
28 7. Botto LD, Mastroiacovo P. Triple surveillance: a proposal for  
29 an integrated strategy to support and accelerate birth  
30 defect prevention. *Ann. N. Y. Acad. Sci* 2018; (1414):126-36.  
31  
32  
33  
34  
35  
36  
37  
38 8. Avni FE, Maugey-Laulom B, Cassart M, *et al.* Foetal  
39 genitourinary tract. In: Callen PW, ed. *Ultrasonography in*  
40 *Obstetrics and Gynecology*. 5th Ed. New York: W.B.  
41 Saunders 2007; 640-75.  
42  
43  
44  
45  
46  
47  
48  
49  
50 9. Metzger BE, Gabbe SG, Persson B, *et al.* International  
51 association of diabetes and pregnancy study groups  
52 recommendations on the diagnosis and classification of  
53  
54  
55  
56  
57  
58  
59  
60

1  
2  
3  
4 hyperglycemia in pregnancy. *Diabetes Care* 2010; 33(3):  
5 676–82. doi: 10.2337/dc09-1848.  
6  
7  
8  
9

- 10  
11 10. EUROCAT. Eurocat Guide 1.3. Instructions for registration  
12 and surveillance of congenital anomalies. Belfast, Northern  
13 Ireland University of Ulster 2005. [http://www.eurocat-  
15 network.eu/content/Section%202.4-%2027%20Oct2016.pdf](http://www.eurocat-<br/>14 network.eu/content/Section%202.4-%2027%20Oct2016.pdf)  
16  
17  
18  
19  
20  
21  
22 11. EUROCAT. Prevalence Tables, 2011-2015  
23 [http://www.eurocat-  
26 network.eu/newprevdata/showPDF.aspx?winx=1896&winy=9  
27 40&file=allsubgroups.aspx](http://www.eurocat-<br/>24 network.eu/newprevdata/showPDF.aspx?winx=1896&winy=9<br/>25 40&file=allsubgroups.aspx) 2015. (accessed 12 December  
28 2017).  
29  
30  
31  
32  
33  
34 12. Springett A, Budd J, Draper ES, *et al.* Congenital Anomaly  
35 Statistics 2012 England and Wales, London 2014.  
36 [www.binocar.org/content/Annual%20report%202012\\_FINAL  
38 nologo.pdf](http://www.binocar.org/content/Annual%20report%202012_FINAL<br/>37 nologo.pdf).  
39  
40  
41  
42  
43  
44  
45  
46 13. Sheridan E, Wright J, Small N, *et al.* Risk factors for  
47 congenital anomaly in a multiethnic birth cohort: an  
48 analysis of the Born in Bradford study. *Lancet* 2013;  
49 382(9901): 1350–9. doi: 10.1016/S0140-6736(13)61132-0.  
50  
51  
52  
53  
54  
55  
56  
57 14. Al Bu Ali WH, Balaha MH, Al Moghannum MS, *et al.* Risk  
58 factors and birth prevalence of CA and inborn errors of  
59  
60



1  
2  
3  
4 metabolism in Al Ahsa, Saudi Arabia. *Pan Afr Med J* 2011; 8:  
5  
6 14.  
7  
8  
9

10  
11 15. Fida NM, Al-Aama J, Nichols W, *et al.* A prospective study  
12 of congenital malformations among live born neonates at a  
13 University Hospital in Western Saudi Arabia. *Saudi Med J*  
14 2007; 28(9): 1367–73.  
15  
16  
17  
18

19  
20  
21  
22 16. Refat MY, Al-Moghanem M, McDonald, *et al.* Major CA at  
23 King Fahd Hofuf Hospital: Prevalence, risk factors and  
24 outcome. *Ann Saudi Med* 1995; 15(4): 339–43.  
25  
26  
27  
28

29  
30  
31 17. Sallout B, Obedat N, Shakeel F, *et al.* Prevalence of major  
32 congenital anomalies at King Fahad Medical City in Saudi  
33 Arabia: a tertiary care centre-based study. *Ann Saudi Med*  
34 2015; 35(5): 343–51.  
35  
36  
37  
38  
39

40  
41  
42  
43 18. Kancherla V, Oakley GP Jr, Brent RL. Urgent global  
44 opportunities to prevent CA. *Semin Foetal Neonatal Med*  
45 2014; 19(3): 153–60.  
46  
47  
48  
49

50  
51  
52 19. Youngblood ME, Williamson R, Bell KN, *et al.* Update on  
53 global prevention of folic acid-preventable spina bifida and  
54 anencephaly. *CA Res A Clin Mol Teratol* 2013; 97(10): 658–  
55 63. doi: 10.1002/CAra.23166. Epub 2013.  
56  
57  
58  
59  
60

- 1  
2  
3  
4  
5  
6 20. Kingdom of Saudi Arabia, Ministry of health, Nutritional  
7 department directive. Number 652/1/26, 2000; 13/09/2000.  
8  
9  
10  
11  
12  
13 21. Food Fortification Initiative. (2013).  
14 [http://www.ffinetwork.org/country\\_profiles/country.php?reco](http://www.ffinetwork.org/country_profiles/country.php?record=194)  
15 [rd=194](http://www.ffinetwork.org/country_profiles/country.php?reco) (accessed 12 December 2017).  
16  
17  
18  
19  
20  
21  
22 22. Kitzmiller JL, Wallerstein R, Correa A, *et al*. Preconception  
23 care for women with diabetes and prevention of major  
24 congenital malformations. *CA Res A Clin Mol Teratol* 2010;  
25 88(10): 791–03. doi: 10.1002/CAra.20734.  
26  
27  
28  
29  
30  
31  
32  
33 23. Simeone RM, Devine OJ, Marcinkevage JA, *et al* Diabetes  
34 and congenital heart defects: a systematic review, meta-  
35 analysis, and modeling project. *Am J Prev Med* 2014; 48(2):  
36 195–204. doi: 10.1016/j.amepre.2014.09.002.  
37  
38  
39  
40  
41  
42  
43  
44  
45 24. Al-Nuaim AR, Al-Rubean K, Al-Mazrou Y, *et al*. Prevalence  
46 of diabetes mellitus, obesity and hypercholesterolemia in  
47 Saudi Arabia: national chronic disease survey. Riyadh (KSA):  
48 Ministry of Health and King Saud University. ISBN: 1995;  
49 9960-603-01-6.  
50  
51  
52  
53  
54  
55  
56  
57  
58  
59  
60

- 1  
2  
3  
4 25. El-Hazmi M, Warsy A, Al-Swailem AR, *et al.* Diabetes  
5  
6 mellitus as a health problem in Saudi Arabia. East Mediterr  
7  
8 Health J 1998 (4): 58–67.  
9  
10  
11  
12  
13 26. Warsy AS, el-Hazmi MA. Diabetes mellitus, hypertension  
14  
15 and obesity--common multifactorial disorders in Saudis.  
16  
17 East Mediterr Health J 1999; 5(6): 1236–42.  
18  
19  
20  
21  
22 27. Al-Nozha MM, Al-Maatouq M, Al-Mazrou YY. *et al.*  
23  
24 Diabetes mellitus in Saudi Arabia. Saudi Med J 2004; 25(11):  
25  
26 1603–10.  
27  
28  
29  
30  
31 28. El-Mouzan MI, Al-Salloum AA, Al-Herbish AS, *et al.*  
32  
33 Regional variations in the prevalence of consanguinity in  
34  
35 Saudi Arabia. Saudi Med J 2007; 28(12): 1881–4.  
36  
37  
38  
39  
40 29. Hamamy H. Consanguineous marriages: Preconception  
41  
42 consultation in primary health care settings. J Community  
43  
44 Genet 2012; 3(3): 185–92.  
45  
46  
47  
48  
49 30. Majeed-Saidan MA, Ammari AN, AlHashem AM, *et al.*  
50  
51 Effect of consanguinity on CA in Saudi women: results from  
52  
53 a nested case-control study. CA Res A Clin Mol Teratol  
54  
55 2015; 103(2): 100–4. doi: 10.1002/CAra.23331.  
56  
57  
58  
59  
60

- 1  
2  
3  
4 31. Mak CM, Lee HC, Chan AY, *et al*. Inborn errors of  
5  
6 metabolism and expanded newborn screening: review and  
7  
8 update. *Crit Rev Clin Lab Sci* 2013; 50(6): 142–62. doi:  
9  
10 10.3109/10408363.2013.847896.  
11  
12  
13  
14  
15 32. Moammar H, Cheriyan G, Mathew R, *et al*. Incidence and  
16  
17 patterns of inborn errors of metabolism in the Eastern  
18  
19 Province of Saudi Arabia, 1983-2008. *Ann Saudi Med* 2010;  
20  
21 30(4): 271–7. doi: 10.4103/0256-4947.65254.  
22  
23  
24  
25  
26  
27 33. Loane M, Dolk H, Morris JK, a EUROCAT working group.  
28  
29 Maternal age-specific risk of non-chromosomal anomalies.  
30  
31 *BJOG* 2009; 116:1111-19.  
32  
33  
34  
35  
36  
37 34. Nabukrea S, Wingate MS, Alexander GR, et al. First -time  
38  
39 births among women 30 years and older in the United  
40  
41 States: patterns and risk of adverse outcome. *J Reprod Med*  
42  
43 2006; 9:676-82.  
44  
45  
46  
47  
48  
49 35. Goetzinger KR, Shanks AL, Odibo AO, st al. Advanced  
50  
51 maternal age and the risk of major congenital anomalies.  
52  
53 *Am J Perinatol*. 2017; 34(3):217-22.  
54  
55  
56  
57  
58  
59  
60

- 1  
2  
3  
4 36. U.S. Preventive Task force. Folic acid for the prevention of  
5  
6 neural tube defects: US preventive services task force  
7  
8 recommendation statement. *Ann Intern Med.* 2009;  
9  
10 150:626-31.  
11  
12  
13  
14  
15  
16 37. Al Rakaf MS, Kurdi AM, Ammari AN, *et al.* Patterns  
17  
18 of folic acid use in pregnant Saudi women and prevalence  
19  
20 of  
21  
22 neural tube defects — Results from a nested case–control  
23  
24 study. *Preventive Medicine Reports* 2 (2015) 572–576.  
25  
26  
27  
28 38. Majeed-Saidan MA, Kashlan FT, Al-Zahrani AA, *et al.*  
29  
30 Pattern of neonatal and postneonatal deaths over a decade  
31  
32 (1995--2004) at a Military Hospital in Saudi Arabia. *Saudi*  
33  
34 *Med J* 2008; 29(6):879-83.  
35  
36  
37  
38  
39  
40  
41  
42  
43  
44  
45  
46  
47  
48  
49  
50  
51  
52  
53  
54  
55  
56  
57  
58  
59  
60

## Tables

Legend: Table 1 Distribution and rates of congenital anomalies (CA) among the cohort's pregnancy outcomes, and associated mortality.

|               | Total cohort |     | With CA |      |             | Timing of CA detection |      |           |      | Mortality among livebirths with CA |      |          |     |                            |      |
|---------------|--------------|-----|---------|------|-------------|------------------------|------|-----------|------|------------------------------------|------|----------|-----|----------------------------|------|
|               | No           | %   | No.     | %    | Rate /10000 | Prenatal               |      | Postnatal |      | Overall (0-2 years)                |      | 1st week |     | Total 1 <sup>st</sup> year |      |
| Birth outcome | No           | %   | No.     | %    | Rate /10000 | No.                    | %    | No.       | %    | No.                                | %    | No.      | %   | No.                        | %    |
| Live births   | 28 369       | 99  | 1 123   | 95.3 | 396         | 505                    | 45.0 | 618       | 55   | 177                                | 15.8 | 64       | 5.7 | 158                        | 14.1 |
| Stillbirths   | 259          | 0.9 | 38      | 3.2  | 1467        | 38                     | 100  |           |      |                                    |      |          |     |                            |      |
| ETOPFA        | 18           | 0.1 | 18      | 1.5  | 10000       | 18                     | 100  |           |      |                                    |      |          |     |                            |      |
| Total         | 28 646       |     | 1 179   |      | 412         | 561                    | 47.6 | 618       | 52.4 |                                    |      |          |     |                            |      |

Footnote:

†ETOPFA, Terminations of pregnancy for foetal anomalies.

Stillbirth (foetal death at 20 weeks of gestation or greater).

Table 2 Prevalence and distribution of congenital anomalies, overall and by pregnancy outcome.

| Birth defects               | Number* | %    | Prevalence per 1000 births (total births = 28646) | Live births |      | Prevalence per 10000 live birth (total live births = 28376) | Stillbirth |      | ETOPFA |      |
|-----------------------------|---------|------|---------------------------------------------------|-------------|------|-------------------------------------------------------------|------------|------|--------|------|
|                             |         |      |                                                   | No.         | %    |                                                             | No.        | %    | No.    | (%)  |
| Any                         | 1179    | 100  | 412                                               | 1123        | 95.3 | 396                                                         | 38         | 3.2  | 18     | 1.5  |
| Nervous system              | 160     | 13.6 | 56                                                | 129         | 80.6 | 45.7                                                        | 18         | 11.3 | 13     | 8.1  |
| Neural Tube Defects         | 54      | 4.6  | 19                                                | 30          | 55.5 | 10.6                                                        | 11         | 20.4 | 13     | 24.1 |
| Anencephalus                | 26      | 2.2  | 9                                                 | 7           | 26.9 | 2.5                                                         | 8          | 30.8 | 11     | 42.3 |
| Encephalocele               | 11      | 0.9  | 4                                                 | 9           | 81.8 | 3.2                                                         | 1          | 9.1  | 1      | 9.1  |
| Spina Bifida                | 17      | 1.4  | 6                                                 | 14          | 82.4 | 4.9                                                         | 2          | 11.8 | 1      | 5.9  |
| Hydrocephaly                | 25      | 2.1  | 9                                                 | 23          | 92.0 | 8.1                                                         | 2          | 8.0  |        |      |
| Microcephaly                | 28      | 2.4  | 10                                                | 24          | 85.7 | 8.5                                                         | 4          | 14.3 |        |      |
| Eye                         | 33      | 2.8  | 12                                                | 33          | 100  | 11.6                                                        |            |      |        |      |
| Anophthalmus/microphthalmus | 11      | 0.9  | 4                                                 | 11          | 100  | 3.9                                                         |            |      |        |      |
| Congenital cataract         | 5       | 0.4  | 2                                                 | 5           | 100  | 1.8                                                         |            |      |        |      |
| Congenital glaucoma         | 9       | 0.8  | 3                                                 | 9           | 100  | 3.2                                                         |            |      |        |      |
| Ear, face and neck          | 7       | 0.6  | 2                                                 | 7           | 100  | 2.5                                                         |            |      |        |      |

|                                            |     |      |      |     |      |      |   |      |   |     |
|--------------------------------------------|-----|------|------|-----|------|------|---|------|---|-----|
| Anotia/microtia                            | 7   | 0.6  | 2    | 7   | 100  | 2.5  |   |      |   |     |
| Cardiac                                    | 425 | 36.0 | 148  | 420 | 90.9 | 148  | 4 | 0.9  |   |     |
| Severe congenital heart defects<br>*       | 91  | 7.7  | 32   | 89  | 97.8 | 31.4 | 2 | 2.2  |   |     |
| Common arterial truncus                    | 3   | 0.3  | 1    | 3   | 100  | 1.1  |   |      |   |     |
| Transposition of great vessels             | 13  | 1.1  | 5    | 13  | 100  | 4.6  |   |      |   |     |
| Single ventricle                           | 6   | 0.5  | 2    | 6   | 100  | 2.1  |   |      |   |     |
| Atrioventricular septal defect             | 17  | 1.4  | 6    | 15  | 88.2 | 5.3  | 2 | 11.8 |   |     |
| Tetralogy of Fallot                        | 15  | 1.3  | 5    | 15  | 100  | 5.3  |   |      |   |     |
| Tricuspid atresia and stenosis             | 4   | 0.3  | 1    | 4   | 100  | 1.4  |   |      |   |     |
| Pulmonary valve stenosis                   | 22  | 1.9  | 8    | 21  | 95.5 | 7.4  | 1 | 4.5  |   |     |
| Pulmonary valve atresia                    | 9   | 0.8  | 3    | 9   | 100  | 3.2  |   |      |   |     |
| Aortic valve atresia/stenosis              | 5   | 0.4  | 2    | 5   | 100  | 1.8  |   |      |   |     |
| Hypoplastic left heart                     | 15  | 1.3  | 5    | 15  | 100  | 5.3  |   |      |   |     |
| Hypoplastic right heart                    | 5   | 0.4  | 2    | 5   | 100  | 1.8  |   |      |   |     |
| Coarctation of aorta                       | 14  | 1.2  | 5    | 14  | 100  | 4.9  |   |      |   |     |
| Total anomalous pulmonary<br>venous return | 2   | 0.2  | 0.7  | 2   | 100  | 0.7  |   |      |   |     |
| Ventricular septal defect                  | 171 | 14.5 | 60   | 171 | 100  | 60.2 |   |      |   |     |
| Atrial septal defect                       | 214 | 18.2 | 74.7 | 214 | 100  | 75.4 |   |      |   |     |
| Oro-facial clefts                          |     |      |      |     |      |      |   |      |   |     |
| Cleft lip with or without palate           | 42  | 3.6  | 14.7 | 35  | 83.3 | 12.3 | 5 | 11.9 | 2 | 4.8 |
| Cleft palate only                          | 11  | 0.9  | 3.8  | 11  | 100  | 3.9  |   |      |   |     |
| Respiratory                                | 33  | 2.8  | 11.5 | 33  | 100  | 11.6 |   |      |   |     |
| Choanal atresia                            | 5   | 0.4  | 1.7  | 5   | 100  | 1.8  |   |      |   |     |



|                                         |     |      |      |     |      |       |   |      |   |      |
|-----------------------------------------|-----|------|------|-----|------|-------|---|------|---|------|
| Digestive system                        | 74  | 6.3  | 25.8 | 71  | 95.9 | 25.0  | 3 | 4.1  |   |      |
| Esophageal atresia with/without fistula | 12  | 1.0  | 4.2  | 12  | 100  | 4.2   |   |      |   |      |
| Ano-rectal atresia and stenosis         | 26  | 2.2  | 9.1  | 25  | 96.2 | 8.8   | 1 | 3.8  |   |      |
| Diaphragmatic hernia                    | 18  | 1.5  | 6.3  | 16  | 88.9 | 5.6   | 2 | 11.1 |   |      |
| Abdominal wall defects                  | 7   | 0.6  | 2.4  | 6   | 85.7 | 2.1   | 1 | 14.3 |   |      |
| Gastroschisis                           | 2   | 0.2  | 0.7  | 1   | 50.0 | 0.4   | 1 | 50.0 |   |      |
| Omphalocele                             | 5   | 0.4  | 1.7  | 5   | 100  | 1.8   |   |      |   |      |
| Urinary                                 | 323 | 27.4 | 113  | 318 | 98.5 | 112.1 | 4 | 1.2  | 1 | 0.3  |
| Bilateral renal agenesis                | 18  | 1.5  | 6.3  | 15  | 83.3 | 5.3   | 2 | 11.1 | 1 | 5.6  |
| Renal dysplasia                         | 60  | 5.1  | 21   | 58  | 96.7 | 20.4  | 2 | 3.3  |   |      |
| Congenital hydronephrosis               | 194 | 16.5 | 67.7 | 194 | 100  | 68.4  |   |      |   |      |
| Genital                                 | 127 | 10.8 | 44.3 | 126 | 99.2 | 44.4  | 1 | 0.8  |   |      |
| Hypospadias                             | 108 | 9.2  | 37.7 | 108 | 100  | 38.1  |   |      |   |      |
| Indeterminate sex                       | 3   | 0.3  | 1.0  | 2   | 66.7 | 0.7   | 1 | 33.3 |   |      |
| Limb                                    | 99  | 8.4  | 34.6 | 92  | 92.9 | 32.4  | 4 | 4.0  | 3 | 3.0  |
| Limb deficiencies, all                  | 17  | 1.4  | 5.9  | 17  | 100  | 6.0   |   |      |   |      |
| Upper limb deficiency                   | 12  | 1.0  | 4.2  | 12  | 100  | 4.2   |   |      |   |      |
| Lower limb deficiency                   | 7   | 0.6  | 2.4  | 7   | 100  | 2.5   |   |      |   |      |
| Club foot - talipes equinovarus         | 19  | 1.6  | 6.6  | 15  | 78.9 | 5.3   | 2 | 10.5 | 2 | 10.5 |
| Hip dislocation and/or dysplasia        | 24  | 2.0  | 8.4  | 23  | 95.8 | 8.1   |   |      | 1 | 4.2  |
| Polydactyly                             | 23  | 2.0  | 8.0  | 23  | 100  | 8.1   |   |      |   |      |
| Syndactyly                              | 9   | 0.8  | 3.1  | 9   | 100  | 3.2   |   |      |   |      |
| Musculo-skeletal                        | 40  | 3.4  | 14   | 33  | 82.5 | 11.6  | 7 | 17.5 |   |      |

|                                              |    |     |      |    |      |      |   |      |   |     |
|----------------------------------------------|----|-----|------|----|------|------|---|------|---|-----|
| Craniosynostosis                             | 6  | 0.5 | 2.1  | 6  | 100  | 2.1  |   |      |   |     |
| Achondroplasia                               | 3  | 0.3 | 1    | 2  | 66.7 | 0.7  | 1 | 33.3 |   |     |
| Thanatophoric dysplasia                      | 2  | 0.2 | 0.7  | 2  | 100  | 0.7  |   |      |   |     |
| Jeune syndrome                               | 2  | 0.2 | 0.7  | 1  | 50.0 | 0.4  | 1 | 50.5 |   |     |
| Other malformations                          | 42 | 3.6 | 14.7 | 40 | 95.2 | 14.1 | 1 | 2.4  | 1 | 2.4 |
| Situs inversus                               | 10 | 0.8 | 3.5  | 10 | 100  | 3.5  |   |      |   |     |
| By underlying cause                          |    |     |      |    |      |      |   |      |   |     |
| Chromosomal                                  | 82 | 7.0 | 8.6  | 79 | 96.3 | 27.8 | 3 | 3.7  |   |     |
| Down Syndrome/trisomy 21                     | 63 | 5.3 | 22   | 62 | 98.4 | 21.8 | 1 | 1.6  |   |     |
| Edward syndrome/trisomy 18                   | 8  | 0.7 | 2.8  | 7  | 87.5 | 2.5  | 1 | 12.5 |   |     |
| Patau syndrome/trisomy 13                    | 2  | 0.2 | 0.7  | 2  | 100  | 0.7  |   |      |   |     |
| Turner syndrome                              | 3  | 0.3 | 1    | 2  | 66.7 | 0.7  | 1 | 33.3 |   |     |
| Wolff-Hirschhorn syndrome                    | 1  | 0.1 | 0.3  | 1  | 100  | 0.4  |   |      |   |     |
| Genetic syndromes (including microdeletions) | 38 | 3.2 | 13.2 | 36 | 94.7 | 12.7 | 1 | 2.6  | 1 | 2.6 |
| Teratogenic (Carbamazepine embryopathy)      | 1  | 0.1 | 0.3  | 1  | 100  | 0.4  |   |      |   |     |
| Conditions outside Q chapter of ICD-10       |    |     |      |    |      |      |   |      |   |     |
| Inborn error of metabolism                   | 37 | 3.1 | 12.9 | 37 | 100  | 13.0 |   |      |   |     |
| Endocrine disorders                          | 7  | 0.6 | 0.2  | 7  | 100  | 2.5  |   |      |   |     |
| Other                                        | 11 | 0.9 | 4    | 11 | 100  | 3.9  |   |      |   |     |

Legend:

\* The total number of birth defects is greater than the total number of affected births because some had more than one major CA.

§ Severe congenital heart disease (EUROCAT definition): common arterial trunk (Q200), double outlet right ventricle (Q201), transposition of great arteries (Q203), single ventricle (Q204), atrioventricular septal defect (AVSD) (Q212), tetralogy of Fallot (Q213), pulmonary valve atresia (Q220), Ebstein anomaly (Q225), hypoplastic right heart (Q226), aortic valve atresia and stenosis (Q230), mitral valve anomalies (Q232, Q233), hypoplastic left heart (Q234), coarctation of the aorta (Q251), aortic atresia / interrupted aortic arch (Q252), total anomalous pulmonary venous return (Q262).

Legend: Table 3 Common single congenital anomalies (CA) per body system involved

| Body system      | Total number Of CA | Isolated CA |      | Common isolated anomalies                                                                                                                                          |
|------------------|--------------------|-------------|------|--------------------------------------------------------------------------------------------------------------------------------------------------------------------|
|                  |                    | No.         | %    |                                                                                                                                                                    |
| Cardiovascular   | 424                | 265         | 62.5 | ventricular septal defects in 75 (28.3%).<br>Atrial septal defects in 67 (25.3%).<br>Pulmonary valve atresia and stenosis in 18 (6.8%).<br>Sever CHD in 54 (20.4%) |
| Urinary          | 323                | 229         | 70.8 | Congenital hydronephrosis in 147 (64.2%).<br>Bilateral renal agenesis in 3 (1.3%).                                                                                 |
| Central nervous  | 161                | 68          | 42.8 | Neural tube defects in 32 (47.1%).<br>Encephalocele in 4 (5.9%)                                                                                                    |
| Gastrointestinal | 74                 | 33          | 44.6 | Ano-rectal atresia and stenosis in 16 (48.5%).                                                                                                                     |

|      |    |    |      |                                                                                                                       |
|------|----|----|------|-----------------------------------------------------------------------------------------------------------------------|
|      |    |    |      | Diaphragmatic hernia in 6 (18.2).                                                                                     |
| Limb | 97 | 31 | 32   | Total limbs reduction in 9 (29%).<br>Upper limb reduction in 7 (22.6%).<br>Lower limb reduction in 3 (9.7%).          |
| Eye  | 32 | 14 | 43.8 | Congenital glaucoma in 6 (42.9%).<br>Congenital cataract in 4 (28.6%).<br>Anophthalmia + microphthalmia in 3 (21.4%). |

Legend: Table 4 Distribution of parental socio-demographic characteristics and association with congenital anomaly risk (univariate analysis).

| Variable             | Cases<br>(total n=1179) |      | Controls<br>(total n=1262) |      | Odds<br>Ratio <sup>‡</sup> | 95% CI |       |  |
|----------------------|-------------------------|------|----------------------------|------|----------------------------|--------|-------|--|
|                      | No.                     | %    | No.                        | %    |                            | Lower  | Upper |  |
| Consanguinity        |                         |      |                            |      |                            |        |       |  |
| Non-consanguineous   | 537                     | 45.5 | 693                        | 54.9 | Ref                        | -      | -     |  |
| Consanguineous       | 642                     | 54.5 | 569                        | 45.1 | 1.53                       | 1.30   | 1.8   |  |
| Maternal age (years) |                         |      |                            |      |                            |        |       |  |

|                                            |     |      |     |      |      |      |      |
|--------------------------------------------|-----|------|-----|------|------|------|------|
| <20                                        | 24  | 2.0  | 48  | 3.8  | 0.58 | 0.35 | 0.96 |
| 20-30                                      | 599 | 50.8 | 694 | 55.0 | Ref  | -    | -    |
| 31-40                                      | 473 | 40.1 | 474 | 37.6 | 1.16 | 0.98 | 1.37 |
| >40                                        | 83  | 7.0  | 46  | 3.6  | 2.09 | 1.43 | 3.05 |
| Paternal age (years)                       |     |      |     |      |      |      |      |
| 20-30                                      | 341 | 28.9 | 403 | 31.9 | 0.92 | 0.76 | 1.10 |
| 31-40                                      | 548 | 46.5 | 593 | 47.0 | Ref  | -    | -    |
| 41-50                                      | 240 | 20.4 | 225 | 17.8 | 1.15 | 0.93 | 1.43 |
| > 50                                       | 50  | 4.2  | 41  | 3.2  | 1.32 | 0.86 | 2.03 |
| Maternal body mass index <sup>‡</sup>      |     |      |     |      |      |      |      |
| <18.5                                      | 24  | 2.1  | 35  | 2.8  | 0.75 | 0.44 | 1.29 |
| 18.5-24.99                                 | 324 | 27.8 | 388 | 30.8 | 0.91 | 0.74 | 1.12 |
| 25.0-29.99                                 | 352 | 30.2 | 385 | 30.5 | Ref  | -    | -    |
| ≥30                                        | 464 | 39.9 | 453 | 35.9 | 1.12 | 0.92 | 1.36 |
| Previous deliveries (parity)               |     |      |     |      |      |      |      |
| Nulliparous                                | 216 | 18.3 | 273 | 21.6 | 0.92 | 0.74 | 1.16 |
| Para 1-2                                   | 374 | 31.7 | 436 | 34.5 | Ref  | -    | -    |
| Para 3-4                                   | 283 | 24.0 | 273 | 21.6 | 1.21 | 0.97 | 1.50 |
| Para ≥5                                    | 306 | 26.0 | 280 | 22.2 | 1.27 | 1.03 | 1.58 |
| Family monthly income Saudi riyals (US \$) |     |      |     |      |      |      |      |
| <3,000 SR (<800\$)                         | 19  | 1.9  | 12  | 1.0  | 1.87 | 0.89 | 3.92 |
| 10,000-14,000 SR (2667-3999\$)             | 235 | 23.2 | 277 | 22.3 | Ref  | -    | -    |

|                                            |      |      |      |      |      |      |      |
|--------------------------------------------|------|------|------|------|------|------|------|
| 3,000-6,999 SR (800-1866\$)                | 232  | 22.9 | 291  | 23.4 | 0.94 | 0.74 | 1.20 |
| 7,000-9,999 SR (1867-2666\$)               | 367  | 36.3 | 496  | 39.9 | 0.87 | 0.70 | 1.09 |
| ≥15, 000 (≥4000\$)                         | 158  | 15.6 | 167  | 13.4 | 1.12 | 0.84 | 1.47 |
| Maternal education                         |      |      |      |      |      |      |      |
| Illiterate                                 | 391  | 33.2 | 333  | 26.4 | 1.50 | 1.26 | 1.80 |
| Schooling up to high school                | 671  | 56.9 | 859  | 68.1 | Ref  | -    | -    |
| University                                 | 117  | 9.9  | 70   | 5.5  | 2.05 | 1.49 | 2.81 |
| Folic acid intake                          |      |      |      |      |      |      |      |
| Periconceptual                             | 109  | 9.2  | 128  | 10.1 | Ref  | -    | -    |
| Improper use <sup>s</sup>                  | 1070 | 90.8 | 1134 | 89.9 | 1.04 | 0.79 | 1.36 |
| Parental Smoking                           |      |      |      |      |      |      |      |
| Neither parent smoked                      | 837  | 71.0 | 888  | 70.4 | Ref  | -    | -    |
| One or both parents<br>smoked              | 342  | 29.0 | 374  | 29.6 | 0.97 | 0.82 | 1.16 |
| Radiation exposure in pregnancy            |      |      |      |      |      |      |      |
| None                                       | 1161 | 98.5 | 1254 | 99.4 | Ref  | -    | -    |
| Radiation exposure in<br>pregnancy         | 18   | 1.5  | 8    | 0.6  | 2.43 | 1.05 | 5.61 |
| Diabetes mellitus (DM)                     |      |      |      |      |      |      |      |
| No DM                                      | 956  | 81.1 | 1062 | 84.2 | Ref  | -    | -    |
| DM on insulin (all, overt &<br>gestational | 86   | 7.3  | 41   | 3.2  | 2.34 | 1.60 | 3.43 |
| Gestational DM on diet only                | 137  | 11.6 | 157  | 12.6 | 0.91 | 0.62 | 1.16 |

|                                                           |     |      |     |      |      |      |      |
|-----------------------------------------------------------|-----|------|-----|------|------|------|------|
|                                                           |     |      |     |      |      |      |      |
| Sibs of cases and controls (primiparous mothers excluded) |     |      |     |      |      |      |      |
| No affected sibling                                       | 757 | 78.6 | 932 | 94.2 | Ref- | -    | -    |
| Sibling with CA                                           | 85  | 8.8  | 58  | 5.7  | 1.61 | 1.14 | 2.27 |
| Medication use in pregnancy                               |     |      |     |      |      |      |      |
| None                                                      | 792 | 67.2 | 951 | 75.3 | -    | -    | -    |
| Thyroxin                                                  | 102 | 8.7  | 106 | 8.4  | 1.03 | 0.78 | 1.37 |
| Insulin                                                   | 86  | 7.3  | 40  | 3.2  | 2.34 | 1.59 | 3.45 |
| Methyldopa                                                | 14  | 1.2  | 14  | 1.1  | 1.07 | 0.51 | 2.26 |
| Maternal systemic illnesses                               |     |      |     |      |      |      |      |
| None                                                      | 808 | 68.5 | 971 | 76.9 | Ref- | -    | -    |
| Mothers with Hypothyroidism                               | 123 | 10.4 | 128 | 10.1 | 1.03 | 0.80 | 1.34 |
| Mothers with Bronchial asthma                             | 106 | 9.0  | 97  | 7.7  | 1.19 | 0.89 | 1.58 |
| Mothers with depression                                   | 12  | 1.0  | 6   | 0.5  | 2.15 | 0.81 | 5.75 |
| Mothers with essential hypertension                       | 23  | 2.0  | 15  | 1.2  | 1.65 | 0.86 | 3.19 |

Footnote:

\*BMI not available for 15 mothers

Some families declined reporting their income.

1  
2  
3  
4 §Improper-use includes FA taken post conception and 49 mothers (43 case  
5 mothers and 6 control mothers) who were not sure about their intake.  
6  
7  
8  
9  
10  
11  
12  
13  
14  
15  
16  
17  
18  
19  
20  
21  
22  
23  
24  
25  
26  
27  
28  
29  
30  
31  
32  
33  
34

Legend: Table 5 multiple logistic regression model results for the significant risk factors on univariate analysis

| Variable                                    | ADJUSTED OR (from multiple logistic regression model) † |          |       | CRUDE OR (from univariate analysis) |          |       |
|---------------------------------------------|---------------------------------------------------------|----------|-------|-------------------------------------|----------|-------|
|                                             | OR                                                      | 95% C.I. |       | OR                                  | 95% C.I. |       |
|                                             |                                                         | Lower    | Upper |                                     | Lower    | Upper |
| Consanguinity, none (reference group)       | -                                                       | -        | -     | -                                   | -        | -     |
| Consanguinity, first degree                 | 1.52                                                    | 1.28     | 1.81  | 1.53                                | 1.30     | 1.81  |
| Maternal age, 20-30 years (reference group) | -                                                       | -        | -     | -                                   | -        | -     |
| Maternal age, <20 years                     | 0.54                                                    | 0.32     | 0.91  | 0.58                                | 0.35     | 0.96  |
| Maternal age, >40 years                     | 2.11                                                    | 1.35     | 3.30  | 2.09                                | 1.43     | 3.05  |



|                                                         |      |      |      |      |      |      |
|---------------------------------------------------------|------|------|------|------|------|------|
| Maternal education, up to high school (reference group) | -    | -    | -    | -    | -    | -    |
| Maternal education, illiterate                          | 1.41 | 1.17 | 1.70 | 1.50 | 1.26 | 1.80 |
| Maternal education, university                          | 1.74 | 1.24 | 2.44 | 2.05 | 1.49 | 2.81 |
| Diabetes on insulin, overt or gestational (yes/no)      | 1.98 | 1.33 | 2.95 | 2.34 | 1.60 | 3.43 |
| Sibling with anomalies (yes/no)                         | 1.49 | 1.04 | 2.12 | 1.61 | 1.14 | 2.27 |

†: Adjustment for consanguinity, maternal age, maternal education, diabetes mellitus, sibling with anomalies.

### Figures legend:

Legend: Figure \_1 Catchment site and the study flow chart.

Legend: Figure \_2 Study population and distribution of pregnancies and their outcomes.

1  
2  
3  
4 Legend: Figure \_ 3 Frequency among control subjects of selected risk factors for  
5  
6 CA.  
7  
8  
9  
10  
11  
12  
13  
14  
15  
16  
17  
18  
19  
20  
21  
22  
23  
24  
25  
26  
27  
28  
29  
30  
31  
32  
33  
34  
35  
36  
37  
38  
39  
40  
41  
42  
43  
44  
45  
46  
47  
48  
49  
50  
51  
52  
53  
54  
55  
56  
57  
58  
59  
60

For peer review only

Figure 1- Catchment site and the study flow chart.

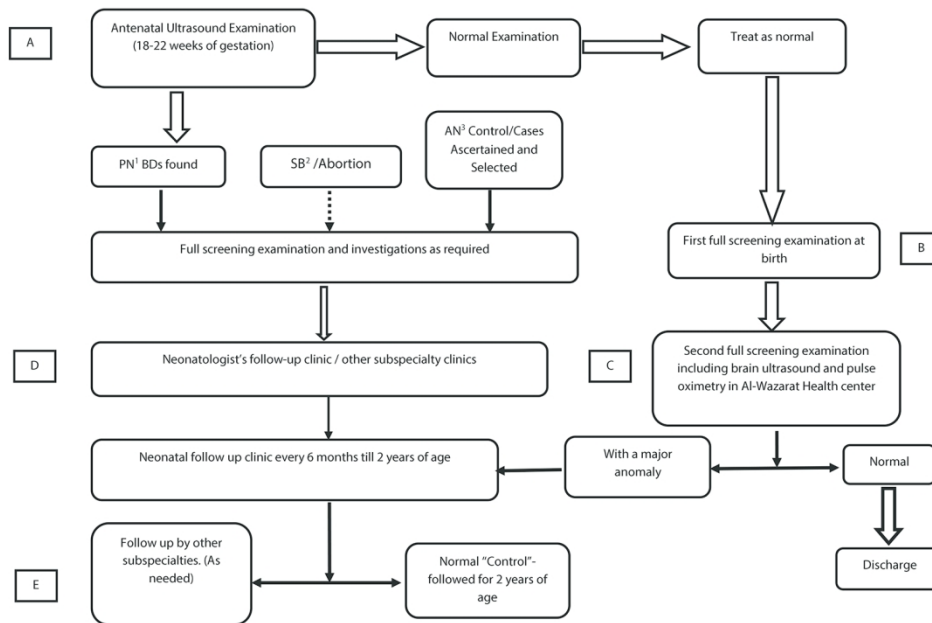

Legend: Case catchment areas (A to E). A: antenatal clinic, B: at birth, C: the "one-month clinic, D: geneticist "one-month clinic", and E: other areas. 1,2,3 are postnatal, stillbirth and antenatal respectively. BD, Birth defect

Legend: Figure \_1 Catchment site and the study flow chart.

150x120mm (300 x 300 DPI)

1  
2  
3  
4  
5  
6  
7  
8  
9  
10  
11  
12  
13  
14  
15  
16  
17  
18  
19  
20  
21  
22  
23  
24  
25  
26  
27  
28  
29  
30  
31  
32  
33  
34  
35  
36  
37  
38  
39  
40  
41  
42  
43  
44  
45  
46  
47  
48  
49  
50  
51  
52  
53  
54  
55  
56  
57  
58  
59  
60

Figure\_2 Study population and distribution of pregnancies and their outcomes.



Legend:

PSMMC, Prince Sultan Military Medical City; ETOPFA, Elective termination of pregnancy for foetal anomaly.

†Eight control foetuses were stillbirth.

Figure 3. Frequency among control subjects of selected risk factors for birth defects.

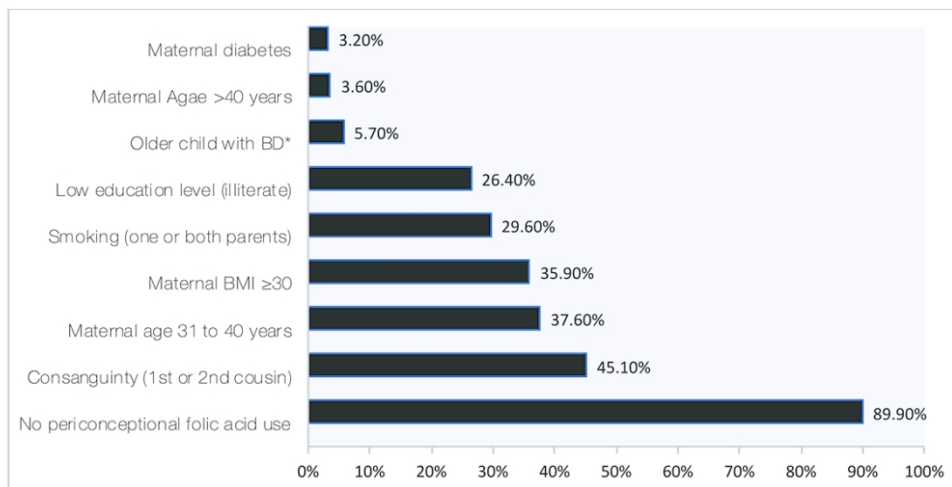

Legend:

BMI, pre-pregnancy maternal body mass index

BD, birth defect

\*Frequency of prior child with BD computed among non-primiparous women

Legend: Figure \_ 3 Frequency among control subjects of selected risk factors for birth defects.

99x79mm (300 x 300 DPI)

Supplement file

Appendix

Confidential



PSMMC

Booklet of

**“Pattern of Fetal Malformations in a Saudi Population”**

Study

Control

Local ID No.: \_\_\_\_\_ / Year 201

Mother’s Name:

\_\_\_\_\_

Mother’s MRN:

\_\_\_\_\_

Baby’s Name:

\_\_\_\_\_

Baby’s MRN:

\_\_\_\_\_

Date of Birth:

\_\_\_\_\_ / \_\_\_\_\_ / \_\_\_\_\_

Contact No: Mobile (husband)

Mobile (wife)

Home

Confidential

Keep in a safe place

**Pattern of Malformations Study – PSMMC**

(Baby and mother)

Local ID No \_\_\_\_\_

D.O.B. (dd/mm/yy): \_\_\_\_/\_\_\_\_/\_\_\_\_ Year: 201\_\_

D. O. B./ Year Unknown Sex: Male  Female  indeterminate  Not known 

No. of babies delivered: Singleton 1  Twin 2  Triplet 3  Quadruplet 4   
 Quintuplet 5  Sextuplet 6   
 Not known 9

Specify twin type of birth, like or unlike sex, zygosity: \_\_\_\_\_

No. of malformed (in multiple set): No. \_\_\_\_ Not known Type of birth: Live Birth (LB).  Still Birth (SB)  Spontaneous Abortion TOP  Not known Civil registration status LB  SB  No CR  Not known Birth weight (g): \_\_\_\_\_ Confirmed Length of gestation (weeks): \_\_\_\_\_ Confirmed 

Survival beyond one week of age:

Yes  No  Alive at discharge <1 Week  Not known 

Date of death (dd/mm/yy): \_\_\_\_/\_\_\_\_/\_\_\_\_ Year: \_\_\_\_\_

D. O. B. Mother (dd/mm/yy): \_\_\_\_/\_\_\_\_/\_\_\_\_ Year: \_\_\_\_\_ Confirmed 

Age of mother at delivery: \_\_\_\_\_

### Pattern of Malformations Study – RMH

(Baby and mother)

Local ID No \_\_\_\_\_

**Mother's residence code at conception:** Province \_\_\_\_\_ District \_\_\_\_\_

Mother's residence code at delivery: Province \_\_\_\_\_ District \_\_\_\_\_

**Total No. of previous pregnancies:** None  Number ( \_\_\_ )  Not known

**When discovered:**

At birth  Less than 1 wk  1-4 wk  1-12 m  >12 m  Prenatal diagnosis

At abortion (sp) or termination  Not known  Postnatal diagnosis, age not known

**Condition at discovery:** Alive  Dead  Not known

**Gestational age at discovery (wk):** \_\_\_\_\_

**First positive prenatal test:**

US at <14 wks  US at 14-21 wks  US at ≥ 22 wk  US GA unknown   
Serum/combined screening  CVS  Amniocentesis  Other tests positive

No positive test, all results negative

**Specify 'other' prenatal test:** \_\_\_\_\_

**Karyotype of infant/ fetus:**

Performed, result known  Performed, result unknown

Not performed  Probe test performed  Failed  Not known

**Specify karyotype:** \_\_\_\_\_

**Post mortem exam:**

Performed, result known  Performed, result unknown

Macerated fetus  Not known  Not performed

**First surgical procedure:**

Performed (or expected) in the first year of life

Performed (or expected) after the first year of life

Prenatal surgery  No surgery required

Too sever for surgery  Not known



**Pattern of Malformations Study – PSMMC**

(Prenatal Malformations)

Local ID No \_\_\_\_\_

|                        | Code | Text |
|------------------------|------|------|
| <b>Syndrome:</b>       |      |      |
| <b>Malformation 1:</b> |      |      |
| <b>Malformation 2:</b> |      |      |
| <b>Malformation 3:</b> |      |      |
| <b>Malformation 4:</b> |      |      |
| <b>Malformation 5:</b> |      |      |
| <b>Malformation 6:</b> |      |      |
| <b>Malformation 7:</b> |      |      |
| <b>Malformation 8:</b> |      |      |

1  
2  
3 **Pattern of Malformations Study – RMH**

4  
5 (All Malformations)

6  
7 Local ID No \_\_\_\_\_

8  
9

|    | Code                   | Text |
|----|------------------------|------|
| 11 | <b>Syndrome:</b>       |      |
| 12 |                        |      |
| 13 | <b>Malformation 1:</b> |      |
| 14 |                        |      |
| 15 | <b>Malformation 2:</b> |      |
| 16 |                        |      |
| 17 | <b>Malformation 3:</b> |      |
| 18 |                        |      |
| 19 | <b>Malformation 4:</b> |      |
| 20 |                        |      |
| 21 | <b>Malformation 5:</b> |      |
| 22 |                        |      |
| 23 | <b>Malformation 6:</b> |      |
| 24 |                        |      |
| 25 | <b>Malformation 7:</b> |      |
| 26 |                        |      |
| 27 | <b>Malformation 8:</b> |      |
| 28 |                        |      |

29

30  
31 **McKusick code:** \_\_\_\_\_

32  
33 **Aetiology:**

34  
35 Chromosome **C**  Familial **F**  Isolated **I**  Multiple **M**

36  
37 New Dominant **ND**  Other Genomic **OG**  Syndrome **S**  Teratogens **T**  Inborn

38  
39 Error of Metabolism **IEM**  Control **Co**

40  
41  
42  
43

44 **View anomaly subgroup(s):**

45  
46  
47  
48  
49  
50  
51  
52  
53  
54  
55  
56  
57  
58  
59  
60

**Pattern of Malformations Study – RMH**

Local ID No \_\_\_\_\_

**Assisted conception:** No  Induced ovulation only  Artificial insemination   
 In vitro fertilization  Gamete intrafollopian transfer   
 Intracytoplasmic sperm injection  Egg donation  Other   
 Not known

**Mother's occupation:** House wife  Teacher  Student  Other

**Maternal Systemic illnesses;**

None  EHT  Hypothyroidism  CHD   
 RHD  CRF  Asthma  SCA  SLE   
 IDA  Anxiety  Depression  Epilepsy   
 Other  (specify) \_\_\_\_\_

**Weight before pregnancy (Kg)** \_\_\_\_\_

**Current weight (Kg)** \_\_\_\_\_

**Mother's height (m)** \_\_\_\_\_

**Body Mass Index:** <18.5  18.5 – 24.9  25 – 29.9   
 30.0 – 34.9  35.0 – 39.9  ≥ 40.0

**True DM:** Yes  No

**Gestational DM on Diet (GDOD)**

**Gestational DM on Insulin (GDOI)**

**Diabetes screening:** GTT (result) 0 time: \_\_\_\_\_ 1hour: \_\_\_\_\_ 2 hours: \_\_\_\_\_

Booking RBS: \_\_\_\_\_

**HbA1c** \_\_\_\_\_

**Infectious disease:**

Tuberculosis: Before pregnancy  During pregnancy  1<sup>st</sup> T  2<sup>nd</sup> T  3<sup>rd</sup> T

Rubella Before pregnancy  During pregnancy  1<sup>st</sup> T  2<sup>nd</sup> T  3<sup>rd</sup> T

CMV Before pregnancy  During pregnancy  1<sup>st</sup> T  2<sup>nd</sup> T  3<sup>rd</sup> T

Toxoplasmosis Before pregnancy  During pregnancy  1<sup>st</sup> T  2<sup>nd</sup> T  3<sup>rd</sup> T

Syphilis Before pregnancy  During pregnancy  1<sup>st</sup> T  2<sup>nd</sup> T  3<sup>rd</sup> T

UTI Before pregnancy  During pregnancy  1<sup>st</sup> T  2<sup>nd</sup> T  3<sup>rd</sup> T

Fever Before pregnancy  During pregnancy  1<sup>st</sup> T  2<sup>nd</sup> T  3<sup>rd</sup> T

FLU Before pregnancy  During pregnancy  1<sup>st</sup> T  2<sup>nd</sup> T  3<sup>rd</sup> T

Others Before pregnancy  During pregnancy  1<sup>st</sup> T  2<sup>nd</sup> T  3<sup>rd</sup> T

(Specify others) \_\_\_\_\_

**Previous surgical history:** Obstetrical/Gynaecological

Specify; \_\_\_\_\_

Non Obstetrical

Specify; \_\_\_\_\_

1  
2  
3  
4  
5  
6  
7  
8  
9  
10  
11  
12  
13  
14  
15  
16  
17  
18  
19  
20  
21  
22  
23  
24  
25  
26  
27  
28  
29  
30  
31  
32  
33  
34  
35  
36  
37  
38  
39  
40  
41  
42  
43  
44  
45  
46  
47  
48  
49  
50  
51  
52  
53  
54  
55  
56  
57  
58  
59  
60

## Pattern of Malformations Study – PSMMC

### Family history & sociodemographic

Local ID No \_\_\_\_\_

#### Folic acid supplementation:

At least 0.4 mg folic acid supplement taken regularly, starting periconceptionally

Folic acid supplement taken irregularly or starting post-conceptionally

No folic acid supplement taken or not recorded

#### ATC code

Text (**only** drugs taken in the 1<sup>st</sup> trimester of pregnancy)

|          |  |  |
|----------|--|--|
| Drugs 1: |  |  |
| Drugs 2: |  |  |
| Drugs 3: |  |  |
| Drugs 4: |  |  |
| Drugs 5: |  |  |

**Consanguinity:** Not related or relationship more distant than second cousin

Relationship of second cousin or closer  Not known

#### Specific information on consanguinity:

\_\_\_\_\_

**Sibs with anomalies:** Same  Other  Same and other  No  Not known

**Previous sibs notified to the Saudi Malformations Registry:** Yes  No  Not known

**Local ID of previous sibs notified to the SMR (1):** \_\_\_\_\_

**Local ID of previous sibs notified to the SMR (2):** \_\_\_\_\_

**Local ID of previous sibs notified to the SMR (3):** \_\_\_\_\_

**Mother's family with anomalies:** Same  Other  Same and other  No

Not known  Specify \_\_\_\_\_

1  
2  
3  
4  
5  
6  
7  
8  
9  
10  
11  
12  
13  
14  
15  
16  
17  
18  
19  
20  
21  
22  
23  
24  
25  
26  
27  
28  
29  
30  
31  
32  
33  
34  
35  
36  
37  
38  
39  
40  
41  
42  
43  
44  
45  
46  
47  
48  
49  
50  
51  
52  
53  
54  
55  
56  
57  
58  
59  
60

**Father’s family with anomalies:** Same  Other  Same and other  No

Not known  Specify \_\_\_\_\_

**Maternal education:** Illiterate  Elementary and lower secondary

Upper secondary  Tertiary  Not known

**Family monthly income (SR):** \_\_\_\_\_

**(husband or combined husband and wife income)**

**Nationality:** Saudi  None Saudi  Only father Saudi  Only mother Saudi

**General additional comments:**

\_\_\_\_\_

\_\_\_\_\_

1  
2  
3  
4  
5  
6  
7  
8 **Pattern of Malformations Study – PSMMC**

9 Local Vars. (1)

10  
11  
12 Local ID No \_\_\_\_\_

13  
14 **Place of birth:** \_\_\_\_\_

15  
16 **Birth order (in multiple set),** (please write as 1<sup>st</sup>, 2<sup>nd</sup>, 3<sup>rd</sup> and so on): \_\_\_\_\_

17  
18 **Date of discovery (dd/mm/yy):** \_\_\_\_/\_\_\_\_/\_\_\_\_ **Year:** \_\_\_\_\_

19  
20 **Amniocentesis:** Performed result positive  Performed result not known

21  
22 Not performed  Performed result negative  Failed  Not known

23  
24 **Ultrasound:** Performed result positive  Performed result not known

25  
26 Not performed  Performed result negative  Failed  Not known

27  
28 **Chorionic villous sampling:** \_\_\_\_\_

29  
30 **Other techniques:**

31  
32 Performed result positive  Performed result not known  Not performed

33  
34 Performed result negative  Failed  Not known

35  
36  
37  
38  
39 **Specify other technique for prenatal diagnosis:** \_\_\_\_\_

40  
41 (Cordocentesis,..etc)

42  
43 **No. of previous spontaneous abortions:** None  1  2  3  4

44  
45 5  6  7  8+  Not known

46  
47 **No. of previous TOP:** None  1  2  3  4  5

48  
49 6  7  8+  Not known

50  
51 **No. of previous live births:** please write the exact No (1-20) \_\_\_\_\_ Unknown

52  
53 **No. of previous stillbirths:** None  1  2  3  4

54  
55 5  6  7  8+  Not known

56  
57 **Mode of transmission:** Familial  De novo  Not known

**Habitual exposures:** Smoking F179  Oude F159   
 Other (specify) \_\_\_\_\_

**Unusual exposures:** X-ray during pregnancy (any)  Nuclear medicine during pregnancy   
 (Radiation & chemical)

**Date of birth of father:** \_\_\_\_/\_\_\_\_/\_\_\_\_ **Year:** \_\_\_\_\_ **Age of father:** \_\_\_\_\_

**Occupation of father:** Soldier  Officer  Civilian

### Pattern of Malformations Study – RMH

Local Vars. (2)

Local ID No \_\_\_\_\_

**Date of last LMP:** \_\_\_\_/\_\_\_\_/\_\_\_\_

**Certainty of LMP:** Certain  Uncertain  No LMP  Not known

**Labor:** Spontaneous  Induced  No labor

**Delivery:** Spontaneous  EMLSCS  ELSCS  ABD   
 Instrumental

#### Sources of information 1:

Notes in routine scan  Birth notification or notification of malformation at birth

Hospital case notes  Death or stillbirth certificate  Prenatal diagnosis

Lab. report (cytogenetic ... etc)  Postmortem exam  Other  Not known

**Sources of information 2:** please insert as in one \_\_\_\_\_

**Sources of information 3:** please insert as in one \_\_\_\_\_

**Sources of information 4:** please insert as in one \_\_\_\_\_

**Sources of information 5:** please insert as in one \_\_\_\_\_

**Racial information** Mother, Tribe code \_\_\_\_\_ Father, Tribe code \_\_\_\_\_

Same tribe  Different tribe



Otaibi 1, Mutairi 2, Shuhri 3, Asiri 4, Shamrani 5, Onazi 6, Shahrani 7, Zaharani 8, Harbi 9, Qahatni 10, Ghamdi 11, Shamari 12, Asmari 13, Ahmari 14, Amri 15, Dawsari 16, Harthi 17, Subaie 18, Ajman 19, Not known (99)

Other 20, specify: \_\_\_\_\_

**Chronic illness of father (including drug abuse):** \_\_\_\_\_

**Confirmation of diagnosis:**

Follow up needed for further confirmation  Confirmed at <6 months   
Confirmed at 6-12 m  Confirmed at 12-18 m  Confirmed at 18-24 m   
Not confirmed, lost for follow up

**Source:** Booked  Un booked  Referred

## Checklist

**STROBE Statement**—checklist of items that should be included in reports of observational studies

|                      | Item No. | Recommendation                                                                                      | Page No. | Relevant text from manuscript                                                                                                                                                                                                                                                                                                                                                                                                                                                                                                        |
|----------------------|----------|-----------------------------------------------------------------------------------------------------|----------|--------------------------------------------------------------------------------------------------------------------------------------------------------------------------------------------------------------------------------------------------------------------------------------------------------------------------------------------------------------------------------------------------------------------------------------------------------------------------------------------------------------------------------------|
| Title and abstract   | 1        | (a) Indicate the study's design with a commonly used term in the title or the abstract              | 1        | Observational, prospective cohort design with a nested case-control study                                                                                                                                                                                                                                                                                                                                                                                                                                                            |
|                      |          | (b) Provide in the abstract an informative and balanced summary of what was done and what was found | 2        | Abstract<br>Of the 28 646 eligible pregnancy outcomes, 1179 were diagnosed with a CA, for an overall prevalence of 412/10000 total births, or 1 in 24 births.                                                                                                                                                                                                                                                                                                                                                                        |
| <b>Introduction</b>  |          |                                                                                                     |          |                                                                                                                                                                                                                                                                                                                                                                                                                                                                                                                                      |
| Background/rationale | 2        | Explain the scientific background and rationale for the investigation being reported                | 4        | <p>Congenital anomalies(CA) are increasingly recognized as a global health priority because of their lifelong impact on health and survival.<sup>1,2</sup></p> <p>CA affect approximately an estimated 1 in 33 newborns, contribute each year to 300,000 deaths in the first month of life, and are associated with 3·2 million birth-related disabilities.<sup>3</sup> Accordingly, the World Health Assembly has emphasized the urgent need for action to help prevent, diagnose, and provide timely intervention.<sup>1</sup></p> |
| Objectives           | 3        | State specific objectives, including any prespecified hypotheses                                    | 4,5      | In this study, we implemented an integrated approach to generate these data in well-defined cohort of women, tracked from mid-gestation through the second year of life of their children, to assess concurrently the burden of potentially modifiable risk factors, the occurrence of CA, and survival of affected children, as a basis for better prevention and care. <sup>4</sup>                                                                                                                                                |
| <b>Methods</b>       |          |                                                                                                     |          |                                                                                                                                                                                                                                                                                                                                                                                                                                                                                                                                      |
| Study design         | 4        | Present key elements of study design early in the paper                                             | 5        | Observational, prospective cohort design with a nested case-control study.                                                                                                                                                                                                                                                                                                                                                                                                                                                           |



|                              |    |                                                                                                                                                                                                                                                                                                                   |      |                                                                                                                                                                                                                                                                                                                                                |
|------------------------------|----|-------------------------------------------------------------------------------------------------------------------------------------------------------------------------------------------------------------------------------------------------------------------------------------------------------------------|------|------------------------------------------------------------------------------------------------------------------------------------------------------------------------------------------------------------------------------------------------------------------------------------------------------------------------------------------------|
| Data sources/<br>measurement | 8* | For each variable of interest, give sources of data and details of methods of assessment (measurement). Describe comparability of assessment methods if there is more than one group                                                                                                                              |      | n/a                                                                                                                                                                                                                                                                                                                                            |
| Bias                         | 9  | Describe any efforts to address potential sources of bias                                                                                                                                                                                                                                                         | 5,6  | Pregnancies referred from other hospitals because of a diagnosis of a foetal anomaly, and babies with CA delivered elsewhere and referred to PSMHC for evaluation and management                                                                                                                                                               |
| Study size                   | 10 | Explain how the study size was arrived at                                                                                                                                                                                                                                                                         | 5    | All mother delivered at PSMHC during the study period were included                                                                                                                                                                                                                                                                            |
| Quantitative variables       | 11 | Explain how quantitative variables were handled in the analyses. If applicable, describe which groupings were chosen and why                                                                                                                                                                                      |      |                                                                                                                                                                                                                                                                                                                                                |
| Statistical methods          | 12 | (a) Describe all statistical methods, including those used to control for confounding                                                                                                                                                                                                                             | 9,10 | Odd ratios for CA were computed first via univariate logistic regression, then with a multiple logistic model. The latter was developed by first including uncorrelated significant factors ( $p < 0.05$ ) from the univariate analysis, then reducing the number of variables by stepwise backward elimination for a more parsimonious model. |
|                              |    | (b) Describe any methods used to examine subgroups and interactions                                                                                                                                                                                                                                               |      | n/a                                                                                                                                                                                                                                                                                                                                            |
|                              |    | (c) Explain how missing data were addressed                                                                                                                                                                                                                                                                       |      |                                                                                                                                                                                                                                                                                                                                                |
|                              |    | (d) <i>Cohort study</i> —If applicable, explain how loss to follow-up was addressed<br><br><i>Case-control study</i> —If applicable, explain how matching of cases and controls was addressed<br><br><i>Cross-sectional study</i> —If applicable, describe analytical methods taking account of sampling strategy | 7    | n/a<br>randomization<br><br>n/a                                                                                                                                                                                                                                                                                                                |

|                  |     |                                                                                                                                                                                                   |         |                                                                                                                                                                                                                                                                            |
|------------------|-----|---------------------------------------------------------------------------------------------------------------------------------------------------------------------------------------------------|---------|----------------------------------------------------------------------------------------------------------------------------------------------------------------------------------------------------------------------------------------------------------------------------|
|                  |     | (e) Describe any sensitivity analyses                                                                                                                                                             |         | n/a                                                                                                                                                                                                                                                                        |
| <b>Results</b>   |     |                                                                                                                                                                                                   |         |                                                                                                                                                                                                                                                                            |
| Participants     | 13* | (a) Report numbers of individuals at each stage of study—eg numbers potentially eligible, examined for eligibility, confirmed eligible, included in the study, completing follow-up, and analysed | 9 -11   | All mothers and their offspring were included. For details see Figure 2.                                                                                                                                                                                                   |
|                  |     | (b) Give reasons for non-participation at each stage                                                                                                                                              |         | n/a                                                                                                                                                                                                                                                                        |
|                  |     | (c) Consider use of a flow diagram                                                                                                                                                                |         |                                                                                                                                                                                                                                                                            |
| Descriptive data | 14* | (a) Give characteristics of study participants (eg demographic, clinical, social) and information on exposures and potential confounders                                                          | 29 - 32 | All demographic data were shown in Tables 4 and 5                                                                                                                                                                                                                          |
|                  |     | <i>Case-control study</i> —Report numbers in each exposure category, or summary measures of exposure                                                                                              |         |                                                                                                                                                                                                                                                                            |
|                  |     | <i>Cross-sectional study</i> —Report numbers of outcome events or summary measures                                                                                                                | 8       | 2 – 5 years. Follow up. Case-infants (with CA) and control-infants were examined in the dedicated study clinic at 1, 6, 12, 18 and 24 months of age                                                                                                                        |
| Outcome data     | 15* | <i>Cohort study</i> —Report numbers of outcome events or summary measures over time                                                                                                               |         |                                                                                                                                                                                                                                                                            |
|                  |     | <i>Case-control study</i> —Report numbers in each exposure category, or summary measures of exposure                                                                                              | 9       | 1179 as cases and 1262 as controls                                                                                                                                                                                                                                         |
|                  |     | <i>Cross-sectional study</i> —Report numbers of outcome events or summary measures                                                                                                                |         |                                                                                                                                                                                                                                                                            |
| Main results     | 16  | (a) Give unadjusted estimates and, if applicable, confounder-adjusted estimates and their precision (eg, 95% confidence interval). Make clear                                                     | 9-11    | Of the 28 646 eligible pregnancy outcomes, 1179 were diagnosed with a CA, for an overall prevalence of 412/10000 total births, or 1 in 24 births. Of these 1179 cases, 38 (3.2%) were stillbirths and 18 (1.5%) were electively terminated because of lethal malformations |

|                   |    |                                                                                                                                                                            |    |                                                                                                                                                                                                                                                                                                                                                                                                                                                                                                                                                                                |
|-------------------|----|----------------------------------------------------------------------------------------------------------------------------------------------------------------------------|----|--------------------------------------------------------------------------------------------------------------------------------------------------------------------------------------------------------------------------------------------------------------------------------------------------------------------------------------------------------------------------------------------------------------------------------------------------------------------------------------------------------------------------------------------------------------------------------|
|                   |    | which confounders were adjusted for and why they were included                                                                                                             |    | (13 with anencephaly, 3 with severe hydrops foetalis and cystic hygroma, 1 with Meckel-Gruber syndrome and 1 with bilateral renal agenesis). The antenatal detection rate among women who has had antenatal ultrasound screening examination was 70.6%(561/795), tables b 1,2,3                                                                                                                                                                                                                                                                                                |
|                   |    | (b) Report category boundaries when continuous variables were categorized                                                                                                  |    |                                                                                                                                                                                                                                                                                                                                                                                                                                                                                                                                                                                |
|                   |    | (c) If relevant, consider translating estimates of relative risk into absolute risk for a meaningful time period                                                           |    |                                                                                                                                                                                                                                                                                                                                                                                                                                                                                                                                                                                |
| Other analyses    | 17 | Report other analyses done—eg analyses of subgroups and interactions, and sensitivity analyses                                                                             |    | n/a                                                                                                                                                                                                                                                                                                                                                                                                                                                                                                                                                                            |
| <b>Discussion</b> |    |                                                                                                                                                                            |    |                                                                                                                                                                                                                                                                                                                                                                                                                                                                                                                                                                                |
| Key results       | 18 | Summarise key results with reference to study objectives                                                                                                                   | 2  | In this cohort of women, the burden of potentially modifiable risk factors included high rates of diabetes (7.3%), maternal age >40 years (7.0%), consanguinity (54.5%), and lack of periconceptional folic acid use (90.8%). The birth prevalence of CA was 41.2/1,000 births (1179 cases / 28646 live births and stillbirths), driven mainly by congenital heart disease (14.8 per 1000), renal malformations (11.3), neural tube defects (1.9), and chromosomal anomalies (2.7). Mortality for live births with CA at 1 and 2 years of age was 14% and 15.8%, respectively. |
| Limitations       | 19 | Discuss limitations of the study, taking into account sources of potential bias or imprecision. Discuss both direction and magnitude of any potential bias                 | 15 | Single centre study, Army personnel household only                                                                                                                                                                                                                                                                                                                                                                                                                                                                                                                             |
| Interpretation    | 20 | Give a cautious overall interpretation of results considering objectives, limitations, multiplicity of analyses, results from similar studies, and other relevant evidence | 15 | High prevalence of CA, multiple modifiable risk factors.                                                                                                                                                                                                                                                                                                                                                                                                                                                                                                                       |

|                          |    |                                                                                                                                                               |    |                                                                                                                                                                                                                             |
|--------------------------|----|---------------------------------------------------------------------------------------------------------------------------------------------------------------|----|-----------------------------------------------------------------------------------------------------------------------------------------------------------------------------------------------------------------------------|
| Generalizability         | 21 | Discuss the generalizability (external validity) of the study results                                                                                         | 15 | Since it's a single centre study, it should be generalized with caution as mentioned in the discussion.                                                                                                                     |
| <b>Other information</b> |    |                                                                                                                                                               |    |                                                                                                                                                                                                                             |
| Funding                  | 22 | Give the source of funding and the role of the funders for the present study and, if applicable, for the original study on which the present article is based | 2  | This project was supported by King Abdul-Aziz City for Science and Technology (KACST) through the National Science, Technology and Innovation Plan (NSTIP). Project No: 09-MED748-21. The funder has no role in this study. |

\*Give information separately for cases and controls in case-control studies and, if applicable, for exposed and unexposed groups in cohort and cross-sectional studies.

**Note:** An Explanation and Elaboration article discusses each checklist item and gives methodological background and published examples of transparent reporting. The STROBE checklist is best used in conjunction with this article (freely available on the Web sites of PLoS Medicine at <http://www.plosmedicine.org/>, Annals of Internal Medicine at <http://www.annals.org/>, and Epidemiology at <http://www.epidem.com/>). Information on the STROBE Initiative is available at [www.strobe-statement.org](http://www.strobe-statement.org).
