# Supplementary material for: Congenital anomalies and associated risk factors in a Saudi population: a cohort study from pregnancy to age 2 years
Source: PubMed Central journal article supplement — BMJ Open. 2019 Sep 5;9(9):e026351. doi: 10.1136/bmjopen-2018-026351 (PMC6731804; doi:10.1136/bmjopen-2018-026351), 2019-09-05
Supplement: bmjopen-2018-026351supp001.pdf [file bmjopen-2018-026351supp001.pdf]

## Supplement file

## Appendix

---

**Confidential**

---

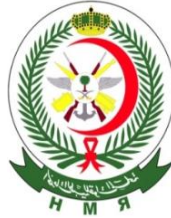

PSMMC

Booklet of

**“Pattern of Fetal Malformations in a Saudi Population”**

Study

Control

Local ID No.: \_\_\_\_\_ / Year 201

Mother's Name:

\_\_\_\_\_

Mother's MRN:

\_\_\_\_\_

Baby's Name:

\_\_\_\_\_

Baby's MRN:

\_\_\_\_\_

Date of Birth:

\_\_\_\_\_/\_\_\_\_\_/\_\_\_\_\_  
\_\_\_\_\_

Contact No: Mobile (husband)

Mobile (wife)

Home

Confidential

Keep in a safe place

**Pattern of Malformations Study – PSMMC**

(Baby and mother)

Local ID No \_\_\_\_\_

D.O.B. (dd/mm/yy): \_\_\_\_/\_\_\_\_/\_\_\_\_ Year: 201\_\_

D. O. B./ Year Unknown Sex: Male  Female  indeterminate  Not known 

No. of babies delivered: Singleton 1  Twin 2  Triplet 3  Quadruplet 4   
 Quintuplet 5  Sextuplet 6   
 Not known 9

Specify twin type of birth, like or unlike sex, zygosity: \_\_\_\_\_

No. of malformed (in multiple set): No. \_\_\_\_ Not known 

Type of birth: Live Birth (LB).  Still Birth (SB)  Spontaneous Abortion   
 TOP  Not known

Civil registration status LB  SB  No CR  Not known Birth weight (g): \_\_\_\_\_ Confirmed Length of gestation (weeks): \_\_\_\_\_ Confirmed 

Survival beyond one week of age:

Yes  No  Alive at discharge <1 Week  Not known 

Date of death (dd/mm/yy): \_\_\_\_/\_\_\_\_/\_\_\_\_ Year: \_\_\_\_\_

D. O. B. Mother (dd/mm/yy): \_\_\_\_/\_\_\_\_/\_\_\_\_ Year: \_\_\_\_\_ Confirmed 

Age of mother at delivery: \_\_\_\_\_

**Pattern of Malformations Study – RMH**

(Baby and mother)

Local ID No \_\_\_\_\_

Mother's residence code at conception: Province \_\_\_\_\_ District \_\_\_\_\_

Mother's residence code at delivery: Province \_\_\_\_\_ District \_\_\_\_\_

Total No. of previous pregnancies: None  Number ( \_\_\_ )  Not known **When discovered:**At birth  Less than 1 wk  1-4 wk  1-12 m  >12 m  Prenatal diagnosis At abortion (sp) or termination  Not known  Postnatal diagnosis, age not known Condition at discovery: Alive  Dead  Not known 

Gestational age at discovery (wk): \_\_\_\_\_

**First positive prenatal test:**US at <14 wks  US at 14-21 wks  US at ≥ 22 wk  US GA unknown   
Serum/combined screening  CVS  Amniocentesis  Other tests positive No positive test, all results negative 

Specify 'other' prenatal test: \_\_\_\_\_

**Karyotype of infant/ fetus:**Performed, result known  Performed, result unknown Not performed  Probe test performed  Failed  Not known 

Specify karyotype: \_\_\_\_\_

**Post mortem exam:**Performed, result known  Performed, result unknown Macerated fetus  Not known  Not performed **First surgical procedure:**Performed (or expected) in the first year of life Performed (or expected) after the first year of life Prenatal surgery  No surgery required Too sever for surgery  Not known

**Pattern of Malformations Study – PSMMC**

(Prenatal Malformations)

Local ID No \_\_\_\_\_

|                        | Code | Text |
|------------------------|------|------|
| <b>Syndrome:</b>       |      |      |
| <b>Malformation 1:</b> |      |      |
| <b>Malformation 2:</b> |      |      |
| <b>Malformation 3:</b> |      |      |
| <b>Malformation 4:</b> |      |      |
| <b>Malformation 5:</b> |      |      |
| <b>Malformation 6:</b> |      |      |
| <b>Malformation 7:</b> |      |      |
| <b>Malformation 8:</b> |      |      |

**Pattern of Malformations Study – RMH**

(All Malformations)

Local ID No \_\_\_\_\_

|                        | Code | Text |
|------------------------|------|------|
| <b>Syndrome:</b>       |      |      |
| <b>Malformation 1:</b> |      |      |
| <b>Malformation 2:</b> |      |      |
| <b>Malformation 3:</b> |      |      |
| <b>Malformation 4:</b> |      |      |
| <b>Malformation 5:</b> |      |      |
| <b>Malformation 6:</b> |      |      |
| <b>Malformation 7:</b> |      |      |
| <b>Malformation 8:</b> |      |      |

**McKusick code:** \_\_\_\_\_

**Aetiology:**

Chromosome **C**  Familial **F**  Isolated **I**  Multiple **M**

New Dominant **ND**  Other Genomic **OG**  Syndrome **S**  Teratogens **T**  Inborn

Error of Metabolism **IEM**  Control **Co**

**View anomaly subgroup(s):**

**Pattern of Malformations Study – RMH**

**Local ID No** \_\_\_\_\_

**Assisted conception:** No  Induced ovulation only  Artificial insemination   
 In vitro fertilization  Gamete intrafollopian transfer   
 Intracytoplasmic sperm injection  Egg donation  Other   
 Not known

**Mother's occupation:** House wife  Teacher  Student  Other

**Maternal Systemic illnesses;**

None  EHT  Hypothyroidism  CHD   
 RHD  CRF  Asthma  SCA  SLE   
 IDA  Anxiety  Depression  Epilepsy   
 Other  (specify) \_\_\_\_\_

**Weight before pregnancy (Kg)** \_\_\_\_\_

**Current weight (Kg)** \_\_\_\_\_

**Mother's height (m)** \_\_\_\_\_

**Body Mass Index:** <18.5  18.5 – 24.9  25 – 29.9   
 30.0 – 34.9  35.0 – 39.9  ≥ 40.0

**True DM:** Yes  No

**Gestational DM on Diet (GDOD)**

**Gestational DM on Insulin (GDOI)**

**Diabetes screening:** GTT (result) 0 time: \_\_\_\_\_ 1hour: \_\_\_\_\_ 2 hours: \_\_\_\_\_

Booking RBS: \_\_\_\_\_

**HbA1c** \_\_\_\_\_

**Infectious disease:**

Tuberculosis: Before pregnancy  During pregnancy  1<sup>st</sup> T  2<sup>nd</sup> T  3<sup>rd</sup> T

Rubella Before pregnancy  During pregnancy  1<sup>st</sup> T  2<sup>nd</sup> T  3<sup>rd</sup> T

CMV Before pregnancy  During pregnancy  1<sup>st</sup> T  2<sup>nd</sup> T  3<sup>rd</sup> T

Toxoplasmosis Before pregnancy  During pregnancy  1<sup>st</sup> T  2<sup>nd</sup> T  3<sup>rd</sup> T

Syphilis Before pregnancy  During pregnancy  1<sup>st</sup> T  2<sup>nd</sup> T  3<sup>rd</sup> T

UTI Before pregnancy  During pregnancy  1<sup>st</sup> T  2<sup>nd</sup> T  3<sup>rd</sup> T

Fever Before pregnancy  During pregnancy  1<sup>st</sup> T  2<sup>nd</sup> T  3<sup>rd</sup> T

FLU Before pregnancy  During pregnancy  1<sup>st</sup> T  2<sup>nd</sup> T  3<sup>rd</sup> T

Others Before pregnancy  During pregnancy  1<sup>st</sup> T  2<sup>nd</sup> T  3<sup>rd</sup> T

(Specify others) \_\_\_\_\_

**Previous surgical history:** Obstetrical/Gynaecological

Specify; \_\_\_\_\_

Non Obstetrical

Specify; \_\_\_\_\_

**Pattern of Malformations Study – PSMMC**

Family history &amp; sociodemographic

Local ID No \_\_\_\_\_

**Folic acid supplementation:**At least 0.4 mg folic acid supplement taken regularly, starting periconceptionally Folic acid supplement taken irregularly or starting post-conceptionally No folic acid supplement taken or not recorded **ATC code**Text (**only** drugs taken in the 1<sup>st</sup> trimester of pregnancy)

|                 |  |  |
|-----------------|--|--|
| <b>Drugs 1:</b> |  |  |
| <b>Drugs 2:</b> |  |  |
| <b>Drugs 3:</b> |  |  |
| <b>Drugs 4:</b> |  |  |
| <b>Drugs 5:</b> |  |  |

**Consanguinity:** Not related or relationship more distant than second cousin Relationship of second cousin or closer  Not known **Specific information on consanguinity:**

\_\_\_\_\_

**Sibs with anomalies:** Same  Other  Same and other  No  Not known **Previous sibs notified to the Saudi Malformations Registry:** Yes  No  Not known **Local ID of previous sibs notified to the SMR (1):** \_\_\_\_\_**Local ID of previous sibs notified to the SMR (2):** \_\_\_\_\_**Local ID of previous sibs notified to the SMR (3):** \_\_\_\_\_**Mother's family with anomalies:** Same  Other  Same and other  No Not known  Specify \_\_\_\_\_



**Father's family with anomalies:** Same  Other  Same and other  No

Not known  Specify \_\_\_\_\_

**Maternal education:** Illiterate  Elementary and lower secondary

Upper secondary  Tertiary  Not known

**Family monthly income (SR):** \_\_\_\_\_

**(husband or combined husband and wife income)**

**Nationality:** Saudi  None Saudi  Only father Saudi  Only mother Saudi

**General additional comments:**

---

---

### Pattern of Malformations Study – PSMMC

Local Vars. (1)

Local ID No \_\_\_\_\_

Place of birth: \_\_\_\_\_

Birth order (in multiple set), (please write as 1<sup>st</sup>, 2<sup>nd</sup>, 3<sup>rd</sup> and so on): \_\_\_\_\_

Date of discovery (dd/mm/yy): \_\_\_\_/\_\_\_\_/\_\_\_\_ Year: \_\_\_\_\_

Amniocentesis: Performed result positive  Performed result not known

Not performed  Performed result negative  Failed  Not known

Ultrasound: Performed result positive  Performed result not known

Not performed  Performed result negative  Failed  Not known

Chorionic villous sampling: \_\_\_\_\_

Other techniques:

Performed result positive  Performed result not known  Not performed

Performed result negative  Failed  Not known

Specify other technique for prenatal diagnosis: \_\_\_\_\_

(Cordocentesis,..etc)

No. of previous spontaneous abortions: None  1  2  3  4   
5  6  7  8+  Not known

No. of previous TOP: None  1  2  3  4  5   
6  7  8+  Not known

No. of previous live births: please write the exact No (1-20) \_\_\_\_\_ Unknown

No. of previous stillbirths: None  1  2  3  4   
5  6  7  8+  Not known

Mode of transmission: Familial  De novo  Not known

**Habitual exposures:** Smoking F179  Oude F159   
 Other (specify) \_\_\_\_\_

**Unusual exposures:** X-ray during pregnancy (any)  Nuclear medicine during pregnancy   
 (Radiation & chemical)

**Date of birth of father:** \_\_\_\_/\_\_\_\_/\_\_\_\_ **Year:** \_\_\_\_\_ **Age of father:** \_\_\_\_\_

**Occupation of father:** Soldier  Officer  Civilian

### Pattern of Malformations Study – RMH

Local Vars. (2)

Local ID No \_\_\_\_\_

**Date of last LMP:** \_\_\_\_/\_\_\_\_/\_\_\_\_

**Certainty of LMP:** Certain  Uncertain  No LMP  Not known

**Labor:** Spontaneous  Induced  No labor

**Delivery:** Spontaneous  EMLSCS  ELSCS  ABD   
 Instrumental

#### Sources of information 1:

Notes in routine scan  Birth notification or notification of malformation at birth

Hospital case notes  Death or stillbirth certificate  Prenatal diagnosis

Lab. report (cytogenetic ... etc)  Postmortem exam  Other  Not known

**Sources of information 2:** please insert as in one \_\_\_\_\_

**Sources of information 3:** please insert as in one \_\_\_\_\_

**Sources of information 4:** please insert as in one \_\_\_\_\_

**Sources of information 5:** please insert as in one \_\_\_\_\_

**Racial information** Mother, Tribe code \_\_\_\_\_ Father, Tribe code \_\_\_\_\_

Same tribe  Different tribe

Otaibi 1, Mutairi 2, Shuhri 3, Asiri 4, Shamrani 5, Onazi 6, Shahrani 7, Zaharani 8, Harbi 9, Qahatni 10, Ghamdi 11, Shamari 12, Asmari 13, Ahmari 14, Amri 15, Dawsari 16, Harthi 17, Subaie 18, Ajman 19, Not known (99)

Other 20, specify: \_\_\_\_\_

**Chronic illness of father (including drug abuse):** \_\_\_\_\_

**Confirmation of diagnosis:**

Follow up needed for further confirmation  Confirmed at <6 months

Confirmed at 6-12 m  Confirmed at 12-18 m  Confirmed at 18-24 m

Not confirmed, lost for follow up

**Source:** Booked  Un booked  Referred
